# Supplementary material for: Integrating Transcriptomic and Proteomic Data Using Predictive Regulatory Network Models of Host Response to Pathogens
Source: PubMed Central journal article supplement (PMC4942116; doi:10.1371/journal.pcbi.1005013), 2016-07-12
Supplement: pcbi.1005013.s008.pdf [file pcbi.1005013.s008.pdf]

**S8 Table:** Full list of mouse protein regulators predicted by MTG-LASSO.

| MTG-LASSO protein regulator | Module(s)                                      | Human homolog identified by other influenza study                 |
|-----------------------------|------------------------------------------------|-------------------------------------------------------------------|
| 2310036O22Rik               | 3070, 3159, 3199, 3206, 3249                   | Watanabe <i>et al</i> , 2014 (46)                                 |
| C3                          | 2975, 3208, 3210, 2810                         |                                                                   |
| Cpt2                        | 3072                                           |                                                                   |
| Ctsb                        | 3154                                           |                                                                   |
| Cyp2f2                      | 3249                                           |                                                                   |
| Dlg1                        | 3154                                           |                                                                   |
| Dtx3l                       | 3056                                           |                                                                   |
| Eif4a3                      | 2810                                           | Karlas <i>et al</i> , 2010 (36); Shapira <i>et al</i> , 2009 (14) |
| Evpl                        | 2977                                           |                                                                   |
| Fgb                         | 2977, 3156, 2810, 3056                         |                                                                   |
| Fgg                         | 2977                                           |                                                                   |
| Gm2a                        | 2977                                           |                                                                   |
| Hba-x                       | 3179                                           |                                                                   |
| Hnrpd1                      | 3193                                           |                                                                   |
| Hopx                        | 3154, 3280                                     |                                                                   |
| Hp                          | 3207, 3210                                     |                                                                   |
| Hpx                         | 2899, 3184, 3192, 2976, 3159, 3198, 3207       |                                                                   |
| Letmd1                      | 3135, 2950, 3047, 3072, 3139, 3179, 3187       |                                                                   |
| Nrgn                        | 2899                                           |                                                                   |
| Ogfr                        | 3062                                           |                                                                   |
| P01673                      | 3135                                           |                                                                   |
| Pkn2                        | 2977                                           |                                                                   |
| Ripk1                       | 3058                                           |                                                                   |
| S100a8                      | 3141, 3154                                     |                                                                   |
| Sdhb                        | 3072                                           | de Chasse <i>et al</i> , 2013 (102)                               |
| Serpina3k                   | 3029, 3206                                     |                                                                   |
| Serpina3m                   | 3159, 3206, 3029, 3192, 3207, 3181, 3184, 3186 |                                                                   |
| Sfxn3                       | 3154                                           |                                                                   |
| Snrpf                       | 3135, 3056, 3134, 3139, 3181, 3193             | Karlas <i>et al</i> , 2010 (36)                                   |
| Sumo2                       | 3280, 3135, 3147                               | König <i>et al</i> , 2010 (65)                                    |
| Tnks1bp1                    | 3062                                           |                                                                   |
| Ttc33                       | 3198                                           |                                                                   |
| Usp9x                       | 3154                                           | Watanabe <i>et al</i> , 2014 (46)                                 |
