# Supplementary material for: Integrating Transcriptomic and Proteomic Data Using Predictive Regulatory Network Models of Host Response to Pathogens
Source: PubMed Central journal article supplement (PMC4942116; doi:10.1371/journal.pcbi.1005013), 2016-07-12
Supplement: pcbi.1005013.s010.pdf [file pcbi.1005013.s010.pdf]

**S10 Table:** Frequencies of human protein regulators across 10-fold cross-validation.

| Module | Regulator | Frequency |
|--------|-----------|-----------|
| 1434   | THBS1     | 1.0       |
| 1472   | HIST1H1B  | 0.8       |
| 1472   | STMN4     | 0.9       |
| 1472   | THBS1     | 1.0       |
| 1482   | DDX50     | 0.9       |
| 1482   | EHD4      | 1.0       |
| 1482   | THBS1     | 1.0       |
| 1484   | APP       | 1.0       |
| 1484   | ISG15     | 0.9       |
| 1484   | ITGB4     | 0.9       |
| 1484   | NFS1      | 0.9       |
| 1484   | SERPINA3  | 0.9       |
| 1485   | THBS1     | 1.0       |
| 1487   | DDX50     | 0.9       |
| 1487   | PMM2      | 0.9       |
| 1487   | PRPF31    | 0.9       |
| 1487   | YME1L1    | 0.8       |
| 1501   | APP       | 0.9       |
| 1501   | ISG15     | 1.0       |
| 1502   | THBS1     | 1.0       |
| 1540   | HIST1H1B  | 0.9       |
| 1540   | STMN4     | 0.9       |
| 1540   | THBS1     | 1.0       |
| 1543   | IARS2     | 0.9       |
| 1543   | THBS1     | 1.0       |
| 1549   | APP       | 1.0       |
| 1549   | COLGALT1  | 0.8       |
| 1549   | ISG15     | 1.0       |
| 1549   | KLHL33    | 0.9       |
| 1549   | MAGED2    | 0.9       |
| 1549   | THBS1     | 1.0       |
| 1596   | THBS1     | 1.0       |
