# Supplementary material for: Integrating Transcriptomic and Proteomic Data Using Predictive Regulatory Network Models of Host Response to Pathogens
Source: PubMed Central journal article supplement (PMC4942116; doi:10.1371/journal.pcbi.1005013), 2016-07-12
Supplement: pcbi.1005013.s011.pdf [file pcbi.1005013.s011.pdf]

**S11 Table:** Frequencies of mouse protein regulators across 10-fold cross-validation.

| Module | Regulator     | Frequency | Module | Regulator     | Frequency |
|--------|---------------|-----------|--------|---------------|-----------|
| 2810   | Eif4a3        | 0.8       | 3154   | Ctsb          | 0.8       |
| 2810   | Fgb           | 1.0       | 3154   | S100a8        | 1.0       |
| 2899   | Hpx           | 0.9       | 3154   | Usp9x         | 0.9       |
| 2899   | Nrgn          | 1.0       | 3154   | Sfxn3         | 0.9       |
| 2950   | Letmd1        | 1.0       | 3154   | Hopx          | 0.9       |
| 2975   | C3            | 1.0       | 3154   | Dlg1          | 0.9       |
| 2976   | Hpx           | 1.0       | 3156   | Fgb           | 0.9       |
| 2977   | Gm2a          | 0.9       | 3159   | Hpx           | 1.0       |
| 2977   | Fgb           | 0.7       | 3159   | Serpina3m     | 0.7       |
| 2977   | Evpl          | 0.9       | 3159   | 2310036O22Rik | 1.0       |
| 2977   | Fgg           | 1.0       | 3179   | Letmd1        | 1.0       |
| 2977   | Pkn2          | 0.8       | 3179   | Hba-x         | 1.0       |
| 3029   | Serpina3m     | 0.9       | 3181   | Serpina3m     | 1.0       |
| 3029   | Serpina3k     | 0.9       | 3181   | Snrpf         | 1.0       |
| 3047   | Letmd1        | 1.0       | 3184   | Hpx           | 0.9       |
| 3056   | Snrpf         | 1.0       | 3184   | Serpina3m     | 1.0       |
| 3056   | Fgb           | 1.0       | 3186   | Serpina3m     | 1.0       |
| 3056   | Dtx3l         | 1.0       | 3187   | Letmd1        | 1.0       |
| 3058   | Ripk1         | 0.8       | 3192   | Hpx           | 0.9       |
| 3062   | Tnks1bp1      | 0.9       | 3192   | Serpina3m     | 0.9       |
| 3062   | Ogfr          | 1.0       | 3193   | Snrpf         | 1.0       |
| 3070   | 2310036O22Rik | 1.0       | 3193   | Hnrpd1        | 1.0       |
| 3072   | Cpt2          | 1.0       | 3198   | Hpx           | 1.0       |
| 3072   | Letmd1        | 1.0       | 3198   | Ttc33         | 0.9       |
| 3072   | Sdhb          | 0.9       | 3199   | 2310036O22Rik | 1.0       |
| 3134   | Snrpf         | 1.0       | 3206   | Serpina3m     | 0.7       |
| 3135   | Snrpf         | 0.9       | 3206   | 2310036O22Rik | 1.0       |
| 3135   | Letmd1        | 0.9       | 3206   | Serpina3k     | 0.9       |
| 3135   | P01673        | 1.0       | 3207   | Hp            | 1.0       |
| 3135   | Sumo2         | 1.0       | 3207   | Hpx           | 1.0       |
| 3139   | Letmd1        | 1.0       | 3207   | Serpina3m     | 0.9       |
| 3139   | Snrpf         | 1.0       | 3208   | C3            | 1.0       |
| 3141   | S100a8        | 1.0       | 3210   | Hp            | 1.0       |
| 3147   | Sumo2         | 1.0       | 3210   | C3            | 1.0       |
| 3249   | 2310036O22Rik | 1.0       | 3280   | Sumo2         | 0.9       |
| 3249   | Cyp2f2        | 0.7       | 3280   | Hopx          | 1.0       |
