# Supplementary material for: Integrating Transcriptomic and Proteomic Data Using Predictive Regulatory Network Models of Host Response to Pathogens
Source: PubMed Central journal article supplement (PMC4942116; doi:10.1371/journal.pcbi.1005013), 2016-07-12

**Dosage (PFU)**

**Time (days)**

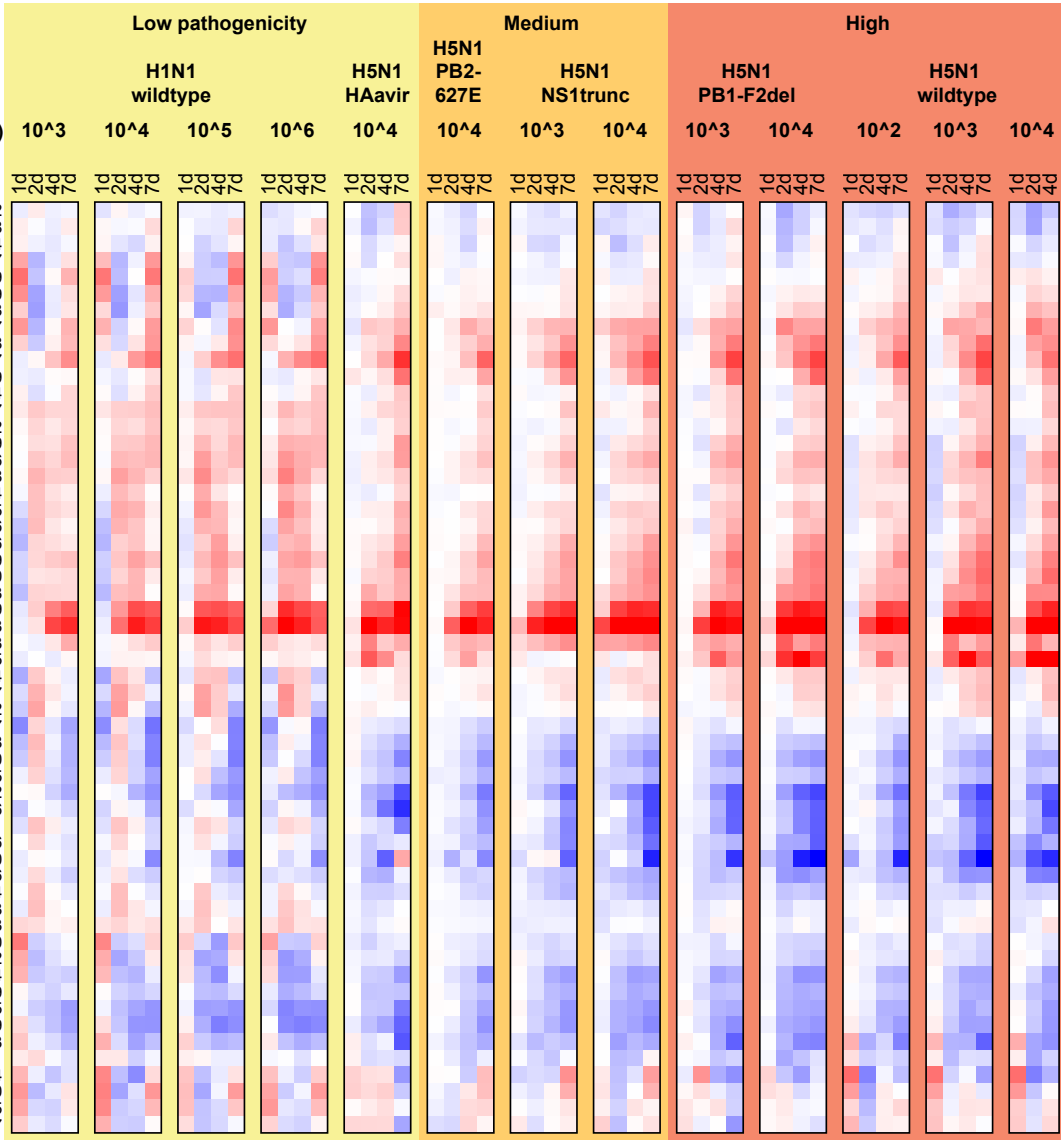

**Mouse modules from MERLIN analysis**

Module3062  
Module3058  
Module3194  
Module3047  
Module3179  
Module3139  
Module3193  
Module2977  
Module3198  
Module3207  
Module3029  
Module3184  
Module3057  
Module3142  
Module2899  
Module2976  
Module3188  
Module2894  
Module3205  
Module3036  
Module3206  
Module3159  
Module3070  
Module3133  
Module3189  
Module3203  
Module3003  
Module3155  
Module3174  
Module3197  
Module3072  
Module3187  
Module3208  
Module3210  
Module2975  
Module3192  
Module3186  
Module3181  
Module3056  
Module2810  
Module3156  
Module3134  
Module3073  
Module3253  
Module2950  
Module3182  
Module3144  
Module3199  
Module3185  
Module3249  
Module3183  
Module3141  
Module3154  
Module3280  
Module3135  
Module3147

**Genes**

11  
15  
11  
11  
11  
64  
16  
15  
94  
613  
10  
15  
11  
11  
14  
10  
21  
11  
11  
11  
30  
14  
61  
17  
10  
39  
47  
181  
11  
15  
56  
10  
11  
11  
22  
120  
29  
21  
912  
19  
19  
10  
12  
24  
19  
11  
16  
26  
33  
20  
13  
14  
13  
11  
10  
39  
40  
10  
14

**AnyMotif**  
**AnyGeneSet**  
**InfluenzaScreen**  
**ImmuneResponse**

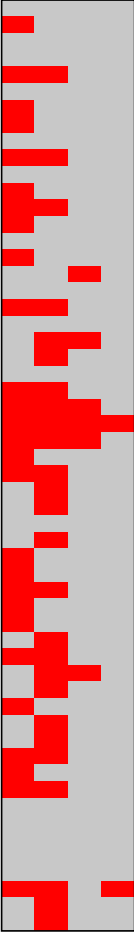

Supplement: pcbi.1005013.s012.pdf [file pcbi.1005013.s012.pdf]
