# Supplementary material for: Integrating Transcriptomic and Proteomic Data Using Predictive Regulatory Network Models of Host Response to Pathogens
Source: PubMed Central journal article supplement (PMC4942116; doi:10.1371/journal.pcbi.1005013), 2016-07-12

**A**

Precision of top ranked genes (Human)

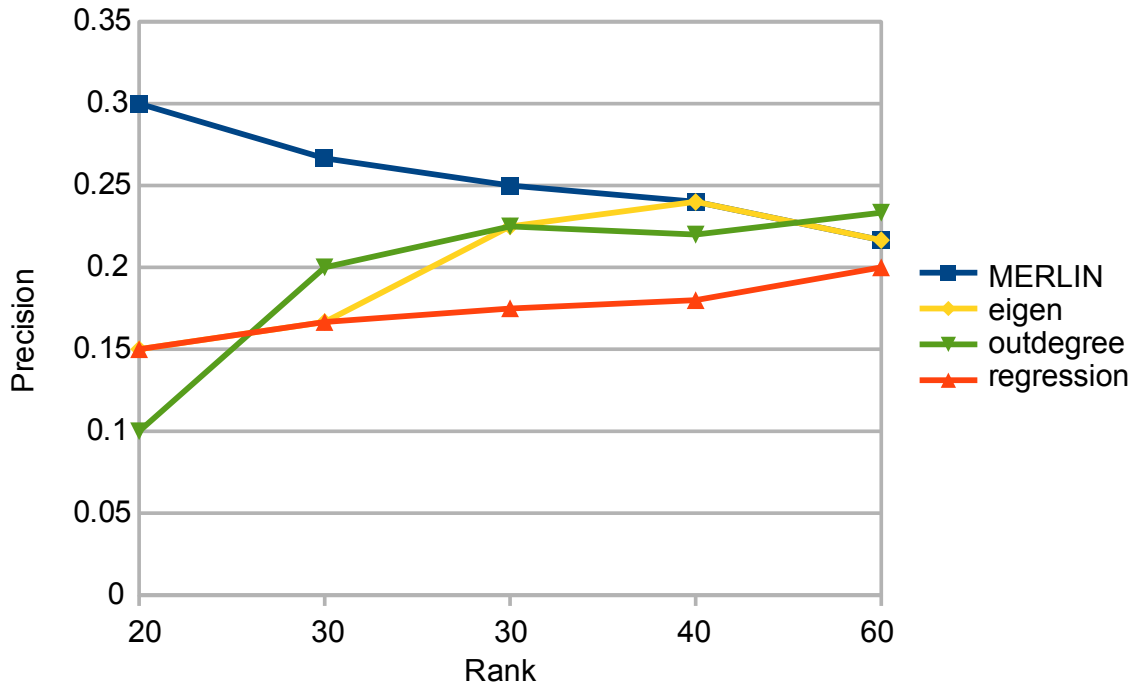**B**

Precision of top ranked genes (Mouse)

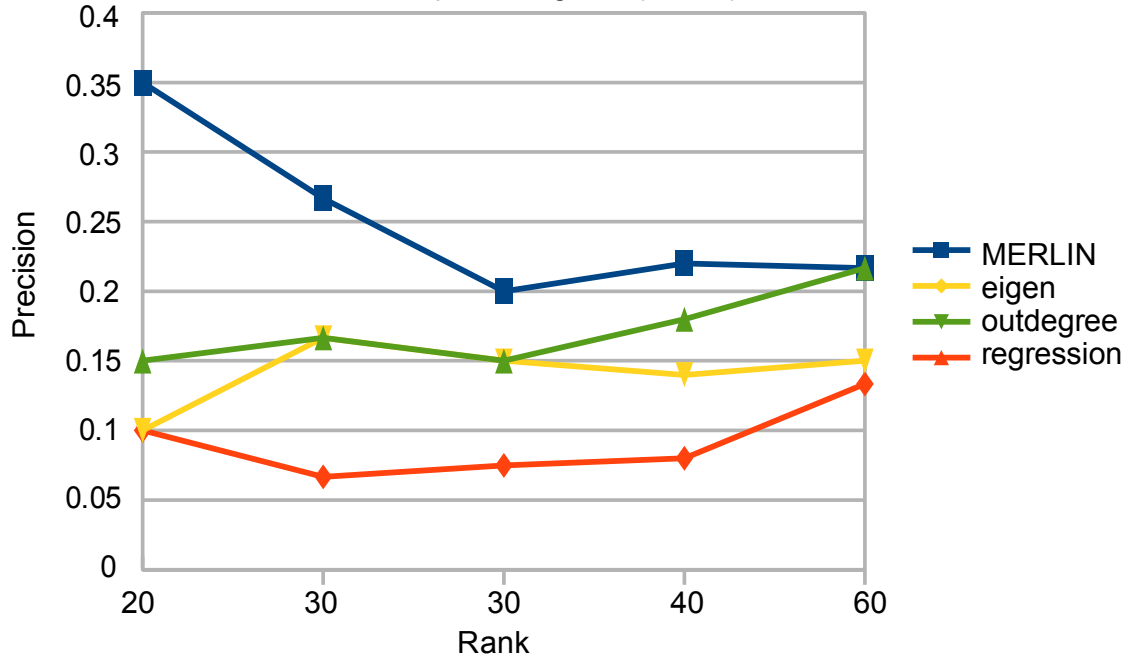

Supplement: pcbi.1005013.s013.pdf [file pcbi.1005013.s013.pdf]
