# Supplementary material for: Integrating Transcriptomic and Proteomic Data Using Predictive Regulatory Network Models of Host Response to Pathogens
Source: PubMed Central journal article supplement (PMC4942116; doi:10.1371/journal.pcbi.1005013), 2016-07-12

A

human mRNA expression (shared with proteins)

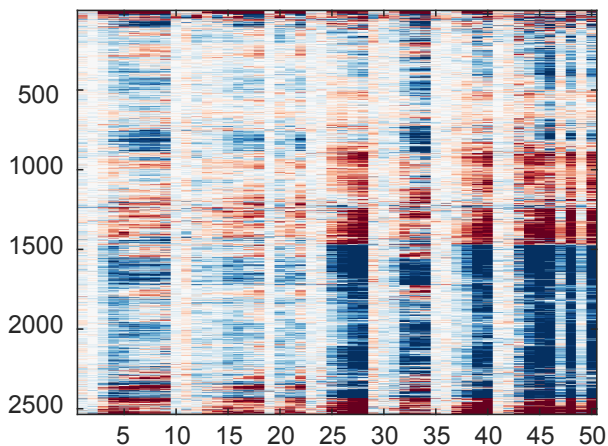

B

human protein levels (shared with mRNA)

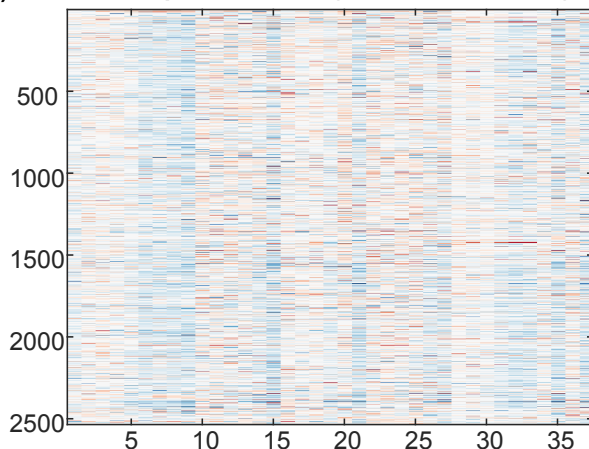

Expression

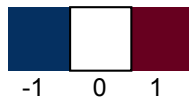

C

mouse mRNA expression (shared with proteins)

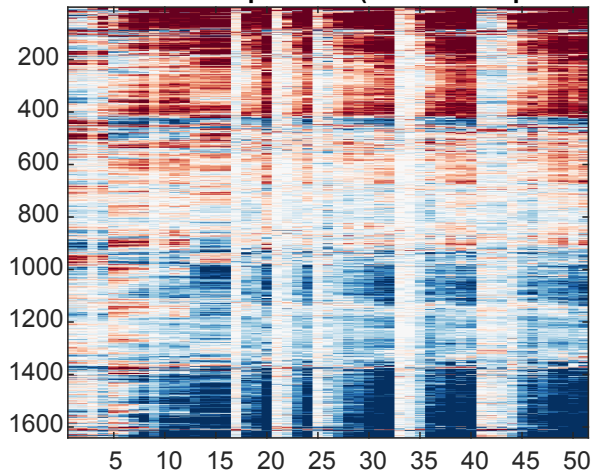

D

mouse protein levels (shared with mRNA)

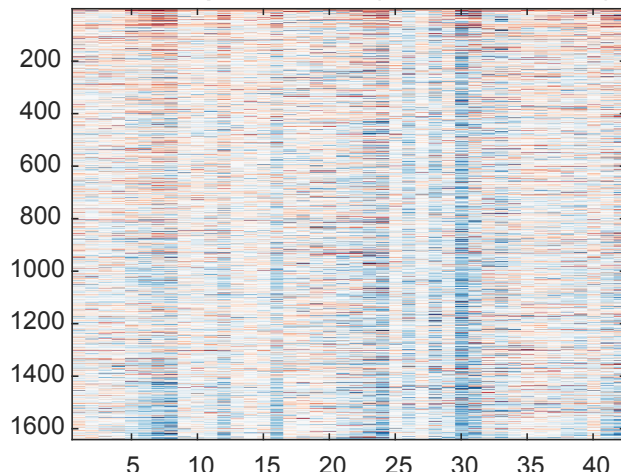

Supplement: pcbi.1005013.s014.pdf [file pcbi.1005013.s014.pdf]
