# Supplementary material for: Integrating Transcriptomic and Proteomic Data Using Predictive Regulatory Network Models of Host Response to Pathogens
Source: PubMed Central journal article supplement (PMC4942116; doi:10.1371/journal.pcbi.1005013), 2016-07-12

**A** MTG-LASSO vs. LASSO Sparsity (human)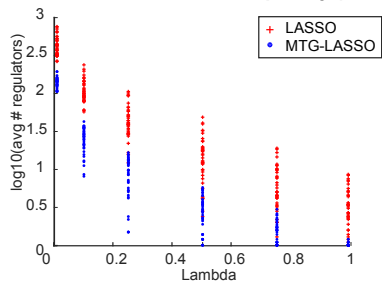**A** MTG-LASSO vs. LASSO Sparsity (mouse)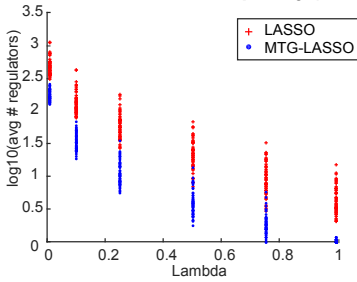**B** Pearson correlation (human)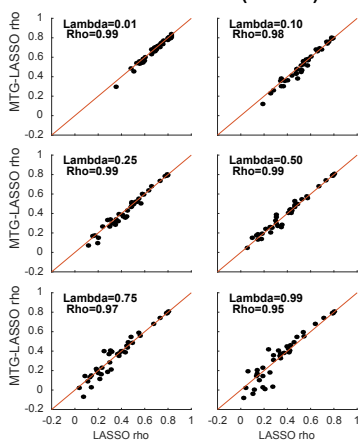**B** Pearson correlation (mouse)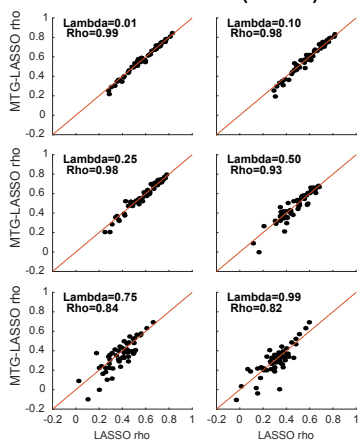**D** Human Modules (Pearson above random)  
LASSO ranking of MTG-LASSO regulators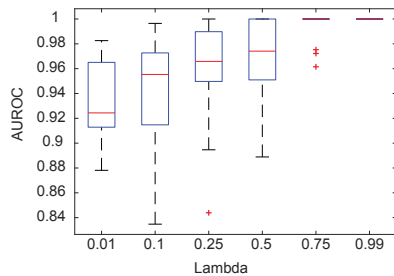**C** RMSE (human)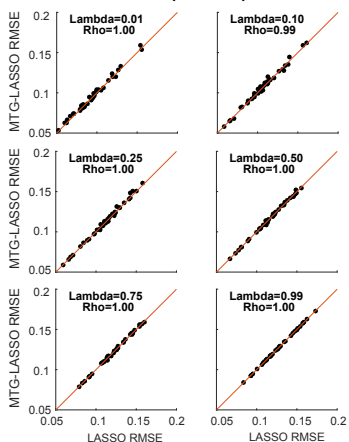**C** RMSE (mouse)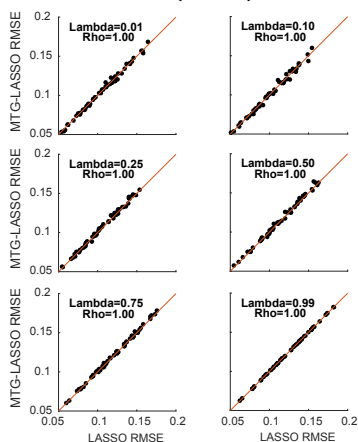**E** Mouse Modules (Pearson above random)  
LASSO ranking of MTG-LASSO regulators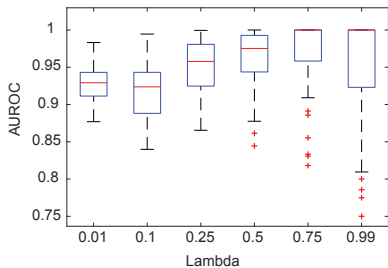

Supplement: pcbi.1005013.s015.pdf [file pcbi.1005013.s015.pdf]
