# Supplementary material for: Integrating Transcriptomic and Proteomic Data Using Predictive Regulatory Network Models of Host Response to Pathogens
Source: PubMed Central journal article supplement (PMC4942116; doi:10.1371/journal.pcbi.1005013), 2016-07-12

**A**

Number of edges over time

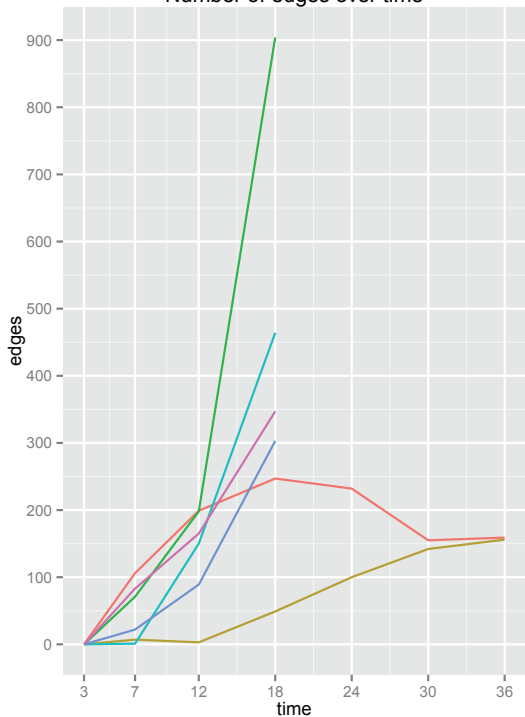**Virus treatment****Low pathogenicity (WT H1N1)**

CA04

NL

**Medium (H5N1 mutants)**

VN1203-PB2627E

VN1203-NS1trunc

**High (H5N1 mutant and WT)**

VN1203-PB1-F2Del

VN1203

**B**

Number of regulators over time

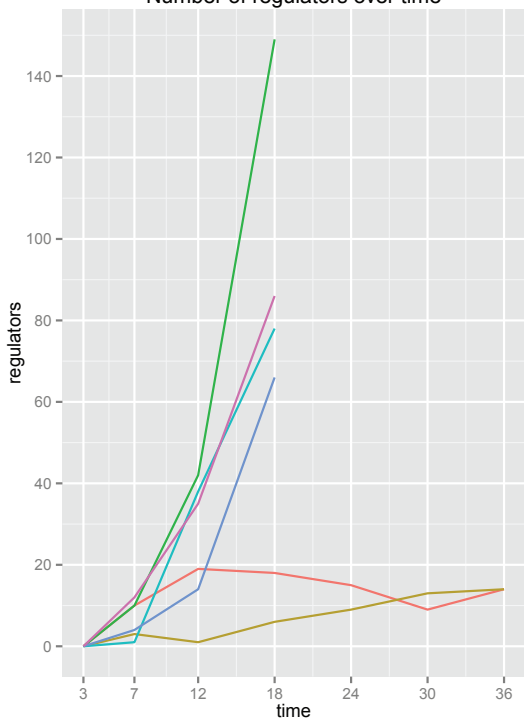**C**

Number of targets over time

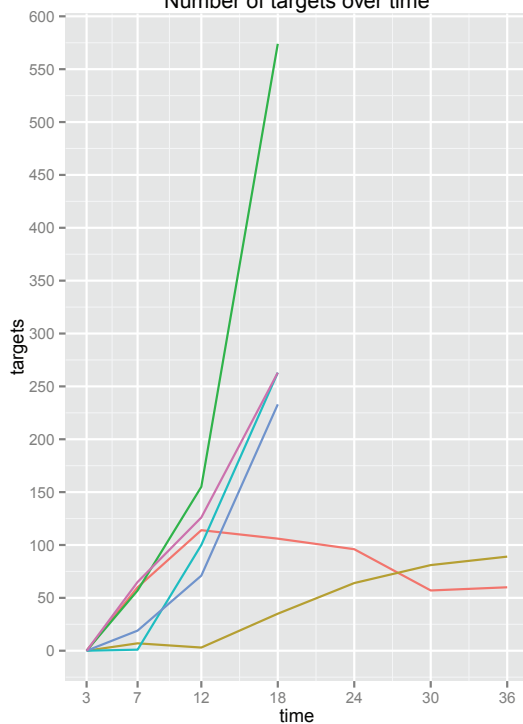

Supplement: pcbi.1005013.s016.pdf [file pcbi.1005013.s016.pdf]
