# Supplementary material for: Integrating Transcriptomic and Proteomic Data Using Predictive Regulatory Network Models of Host Response to Pathogens
Source: PubMed Central journal article supplement (PMC4942116; doi:10.1371/journal.pcbi.1005013), 2016-07-12

**A****Similarity of edges (wrt network on row)**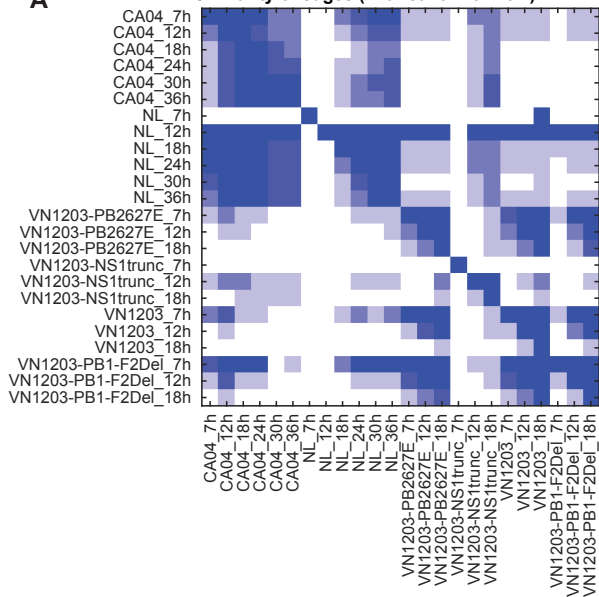

**Precision**  
|intersection|/|row network|

1 0.9 0.8 0.7 0.6 0.5 0.4 0.3 0.2 0.1 0

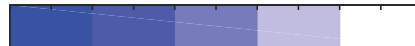

**Low pathogenicity: CA04, NL (both H1N1)**

**H5N1 and mutants:**

**Medium pathogenicity: PB2-627E, NS1trunc**

**High pathogenicity: PB1-F2del, VN1203**

**B****Similarity of regulators (wrt network on row)**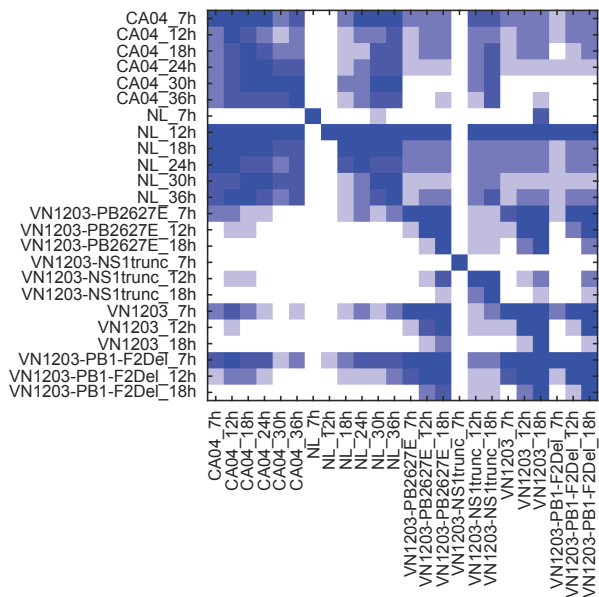**C****Similarity of targets (wrt network on row)**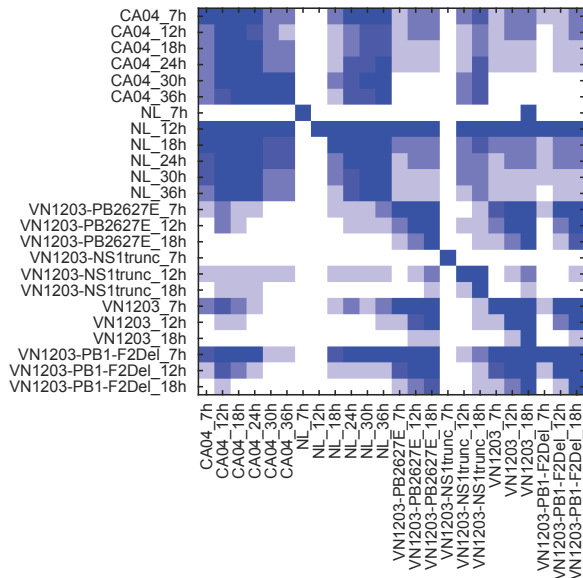

Supplement: pcbi.1005013.s017.pdf [file pcbi.1005013.s017.pdf]
