# Supplementary material for: Integrating Transcriptomic and Proteomic Data Using Predictive Regulatory Network Models of Host Response to Pathogens
Source: PubMed Central journal article supplement (PMC4942116; doi:10.1371/journal.pcbi.1005013), 2016-07-12

# Human Module 1472.

## A. Module expression

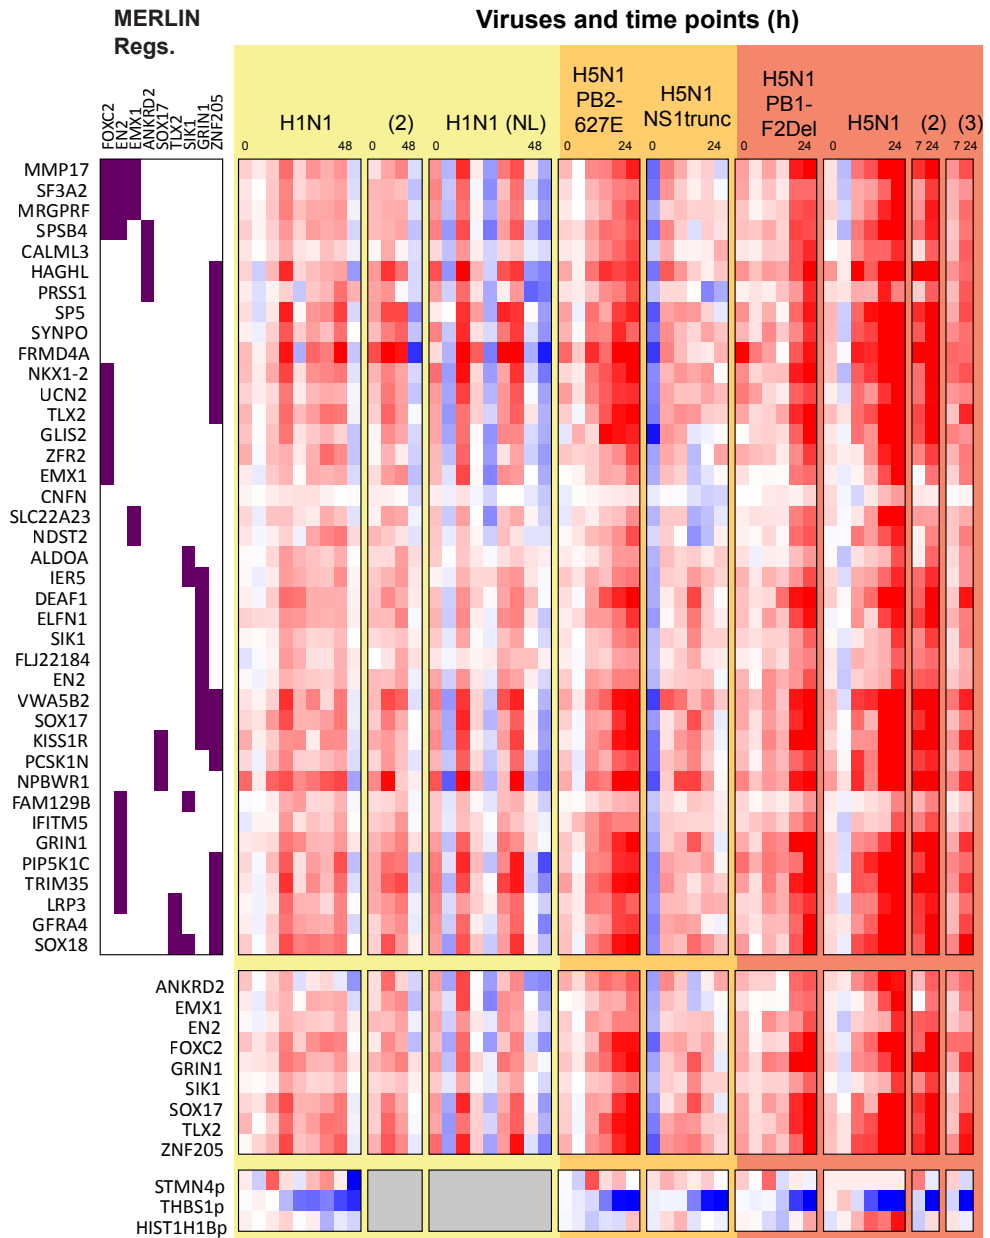

## B. Candidate and high-confidence subnetwork

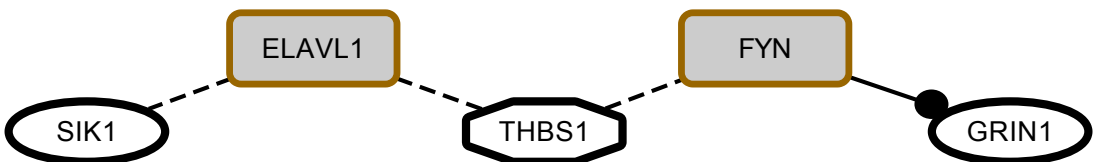

Supplement: pcbi.1005013.s018.pdf [file pcbi.1005013.s018.pdf]
