# Supplementary material for: Integrating Transcriptomic and Proteomic Data Using Predictive Regulatory Network Models of Host Response to Pathogens
Source: PubMed Central journal article supplement (PMC4942116; doi:10.1371/journal.pcbi.1005013), 2016-07-12
Supplement: pcbi.1005013.s020.pdf [file pcbi.1005013.s020.pdf]

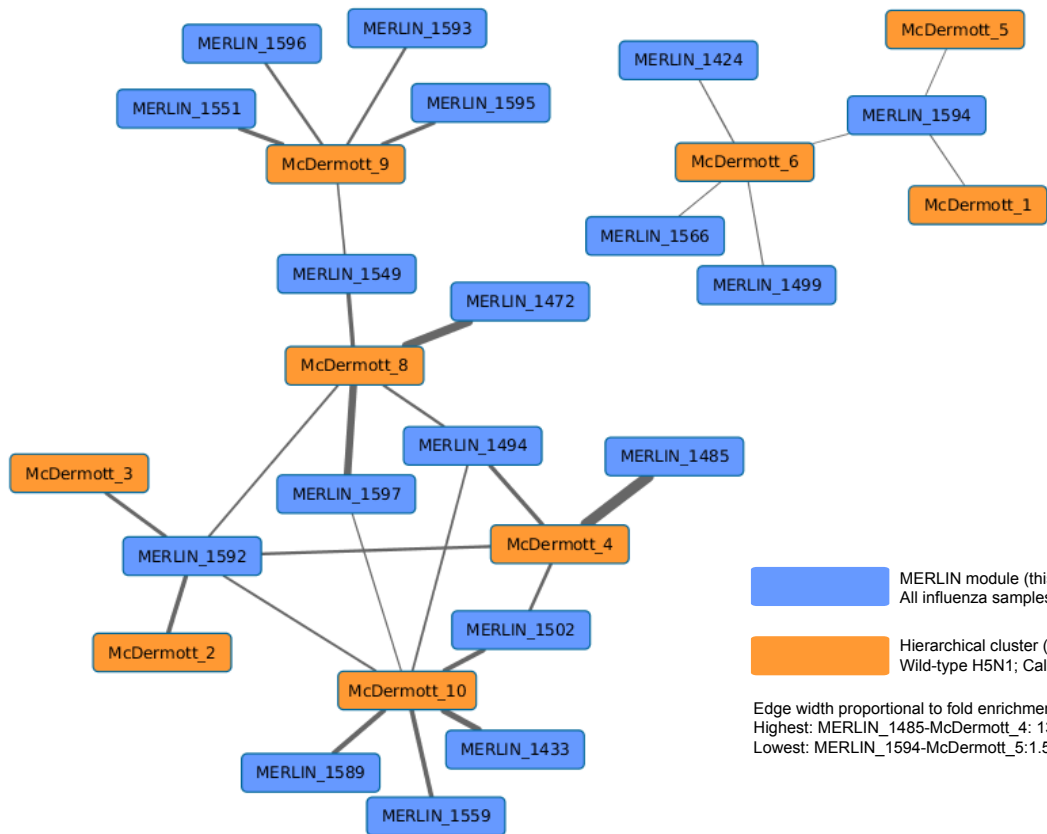

MERLIN module (this manuscript)  
 All influenza samples; Calu-3 cells

Hierarchical cluster (McDermott et al., 2011)  
 Wild-type H5N1; Calu-3 cells

Edge width proportional to fold enrichment of overlap:  
 Highest: MERLIN\_1485-McDermott\_4: 13.6x  
 Lowest: MERLIN\_1594-McDermott\_5: 1.5x
