# Supplementary figures and images for: Integrating Transcriptomic and Proteomic Data Using Predictive Regulatory Network Models of Host Response to Pathogens
Source: PLOS journal article supplement (doi:10.1371/journal.pcbi.1005013), 2016-07-12

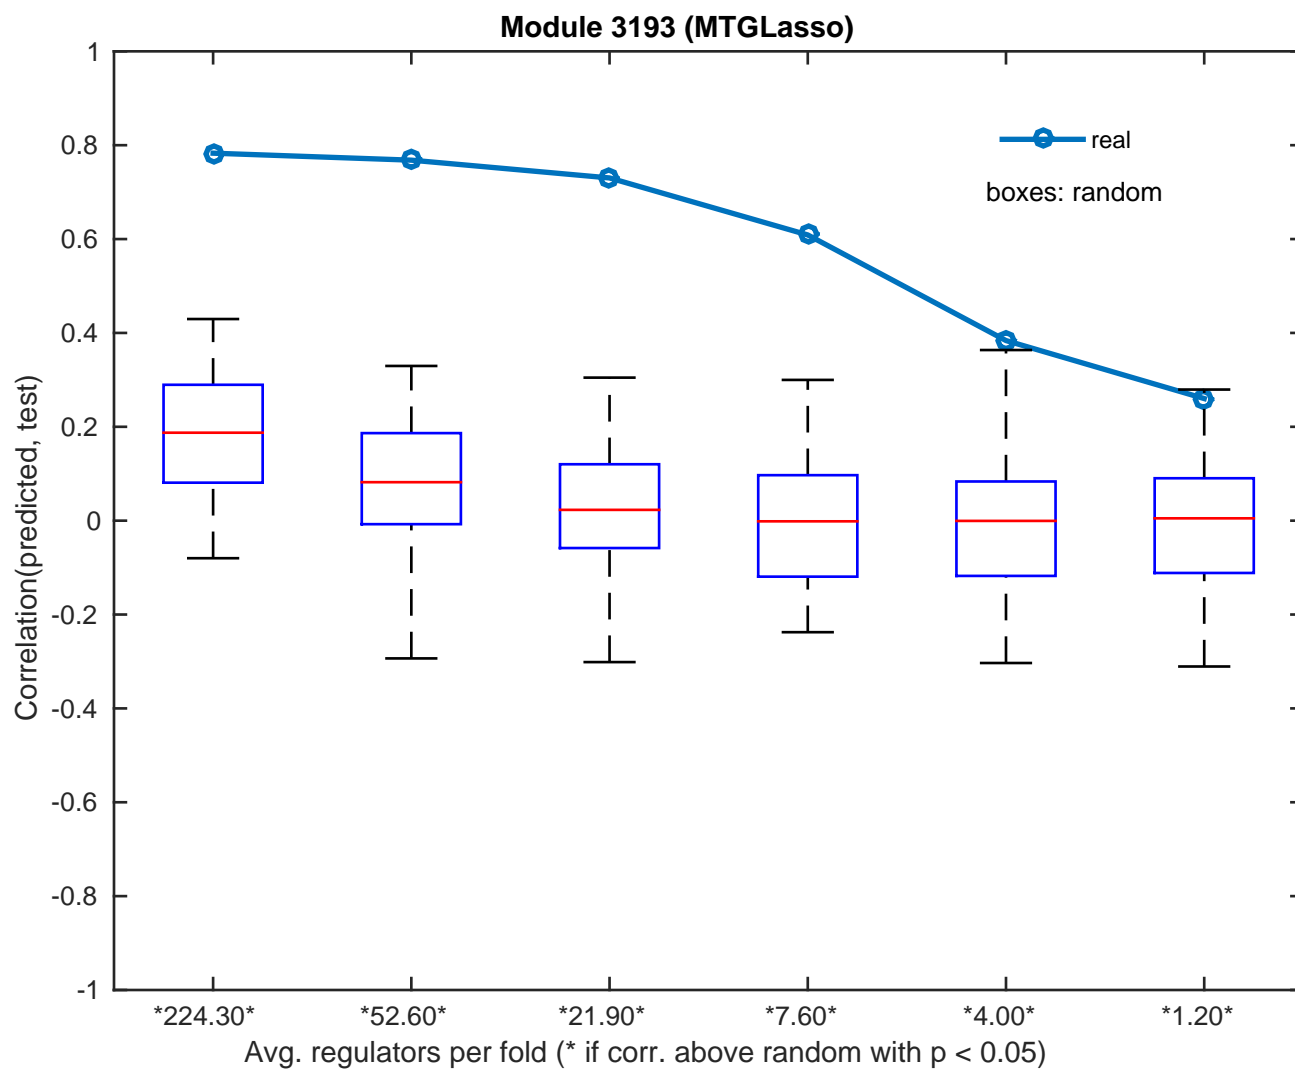

Supplement: S24 (10.1371/journal.pcbi.1005013.s024) [file journal.pcbi.1005013.s024]

Module 3155 (MTGLasso)

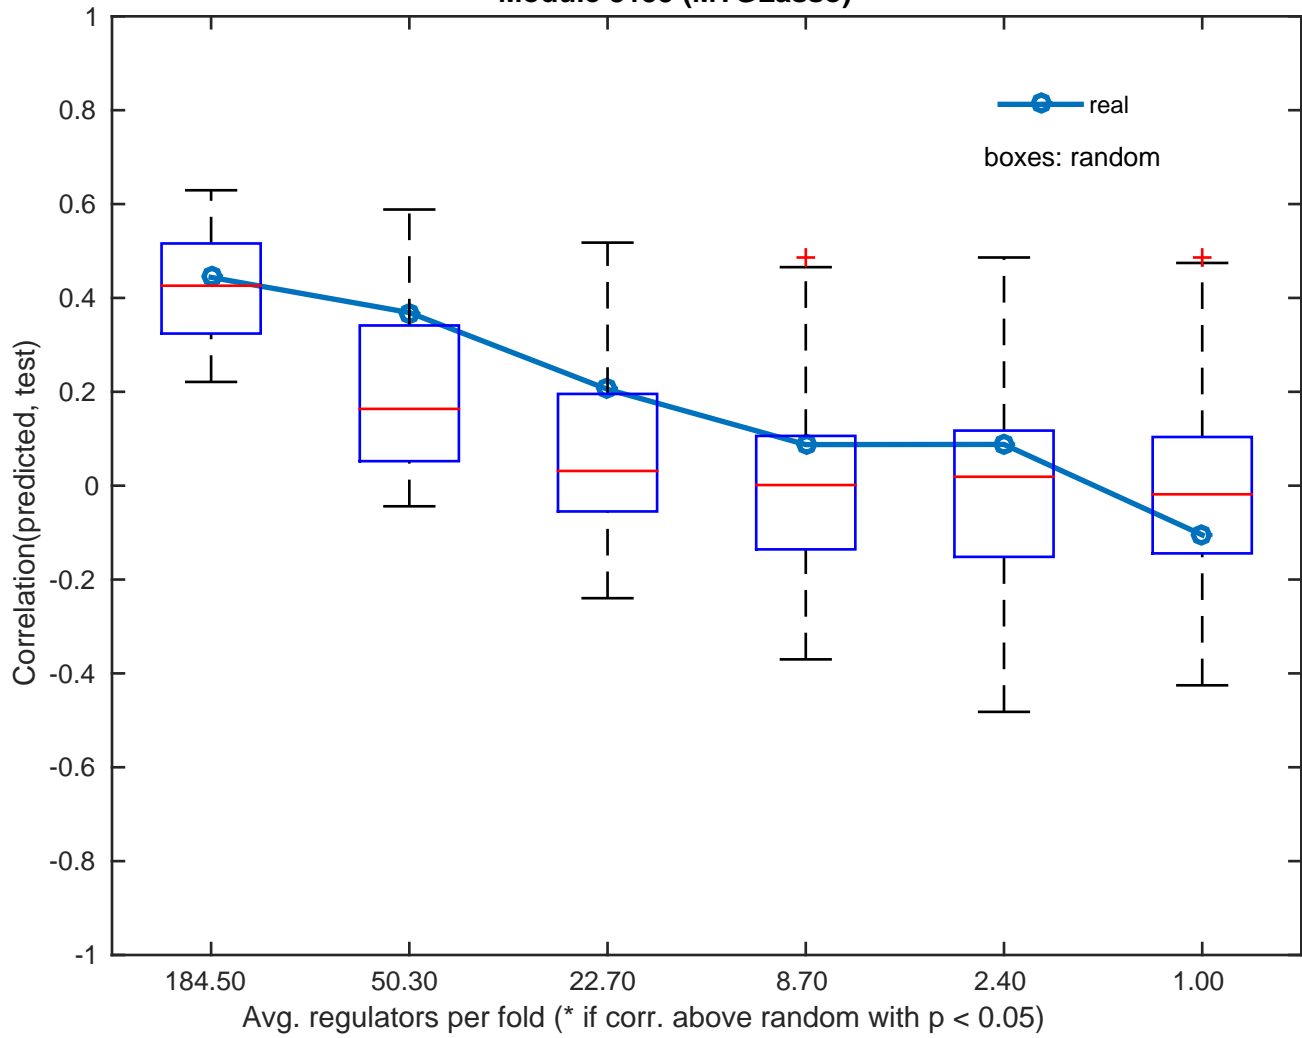

Supplement: S24 (10.1371/journal.pcbi.1005013.s024) [file journal.pcbi.1005013.s024]

Module 3062 (MTGLasso)

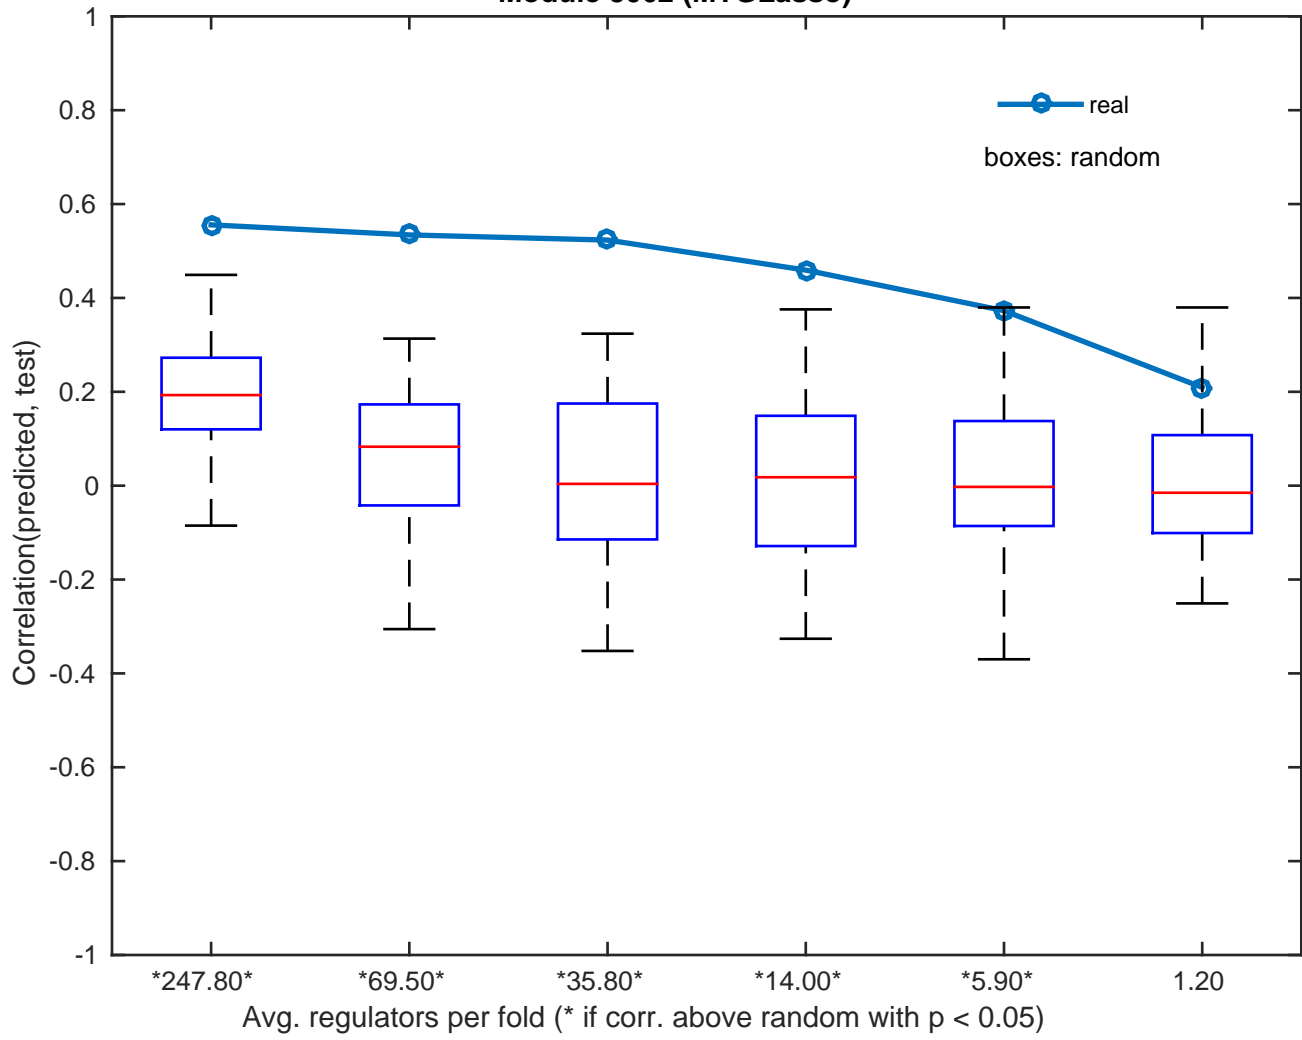

Supplement: S24 (10.1371/journal.pcbi.1005013.s024) [file journal.pcbi.1005013.s024]

Module 1586 (MTGLasso)

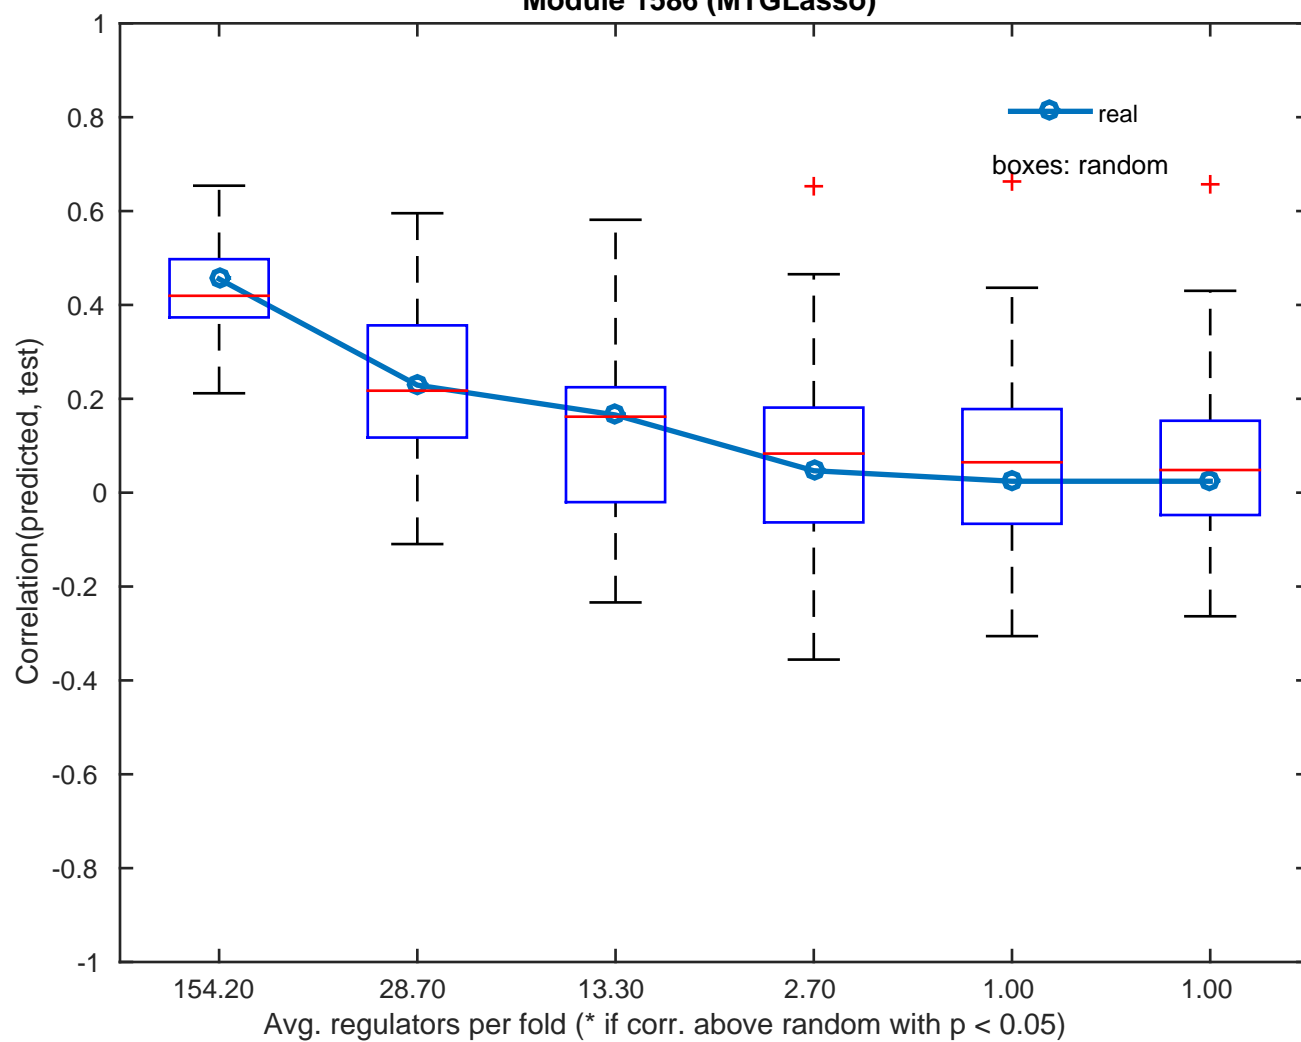

Supplement: S24 (10.1371/journal.pcbi.1005013.s024) [file journal.pcbi.1005013.s024]

Module 1482 (MTGLasso)

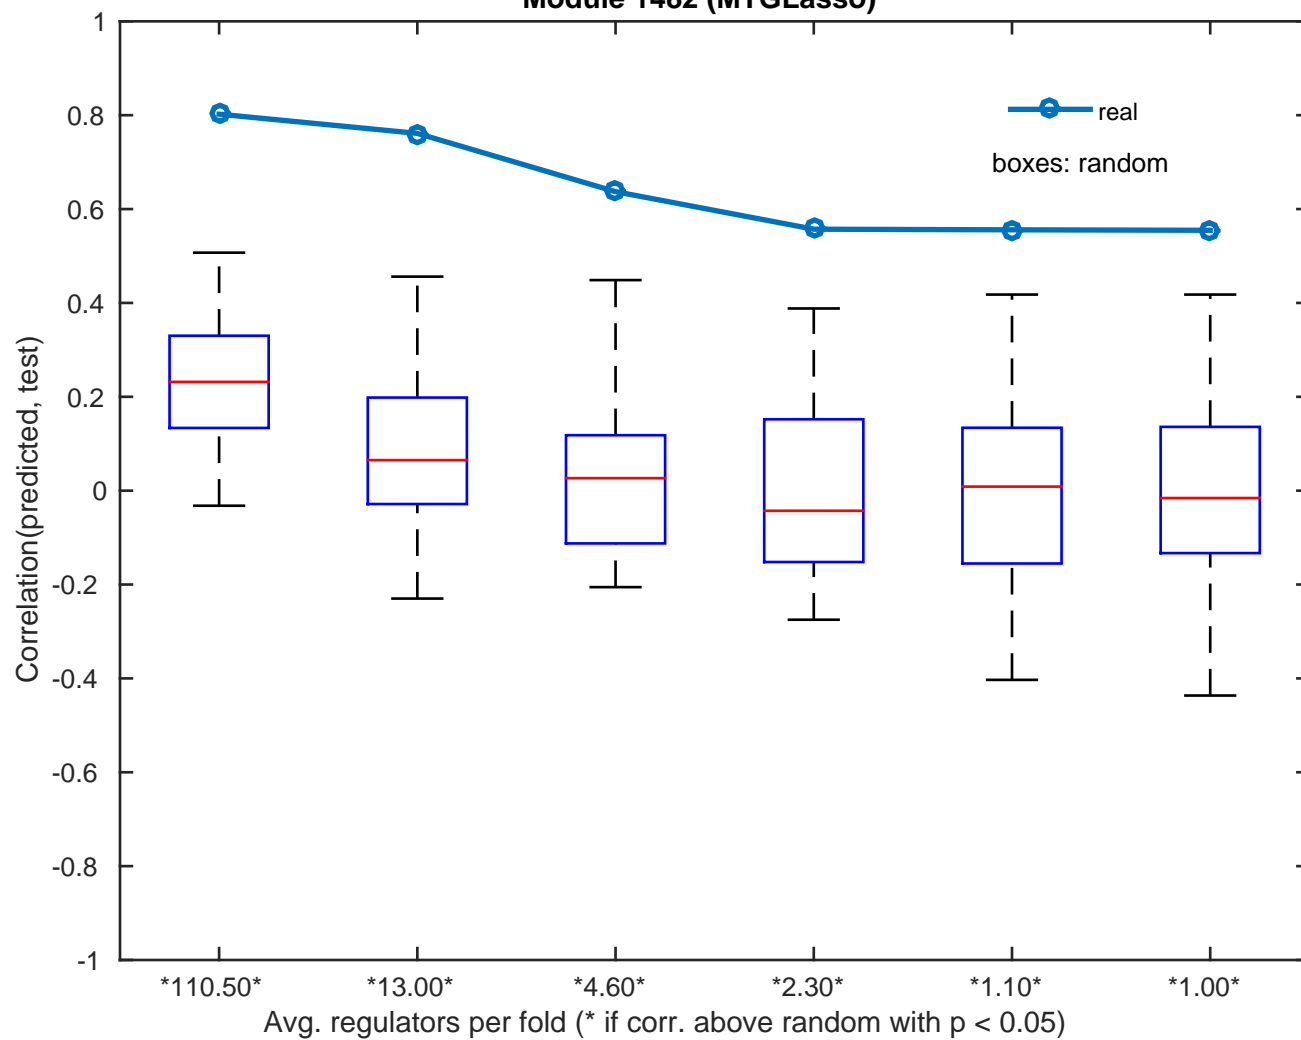

Supplement: S24 (10.1371/journal.pcbi.1005013.s024) [file journal.pcbi.1005013.s024]

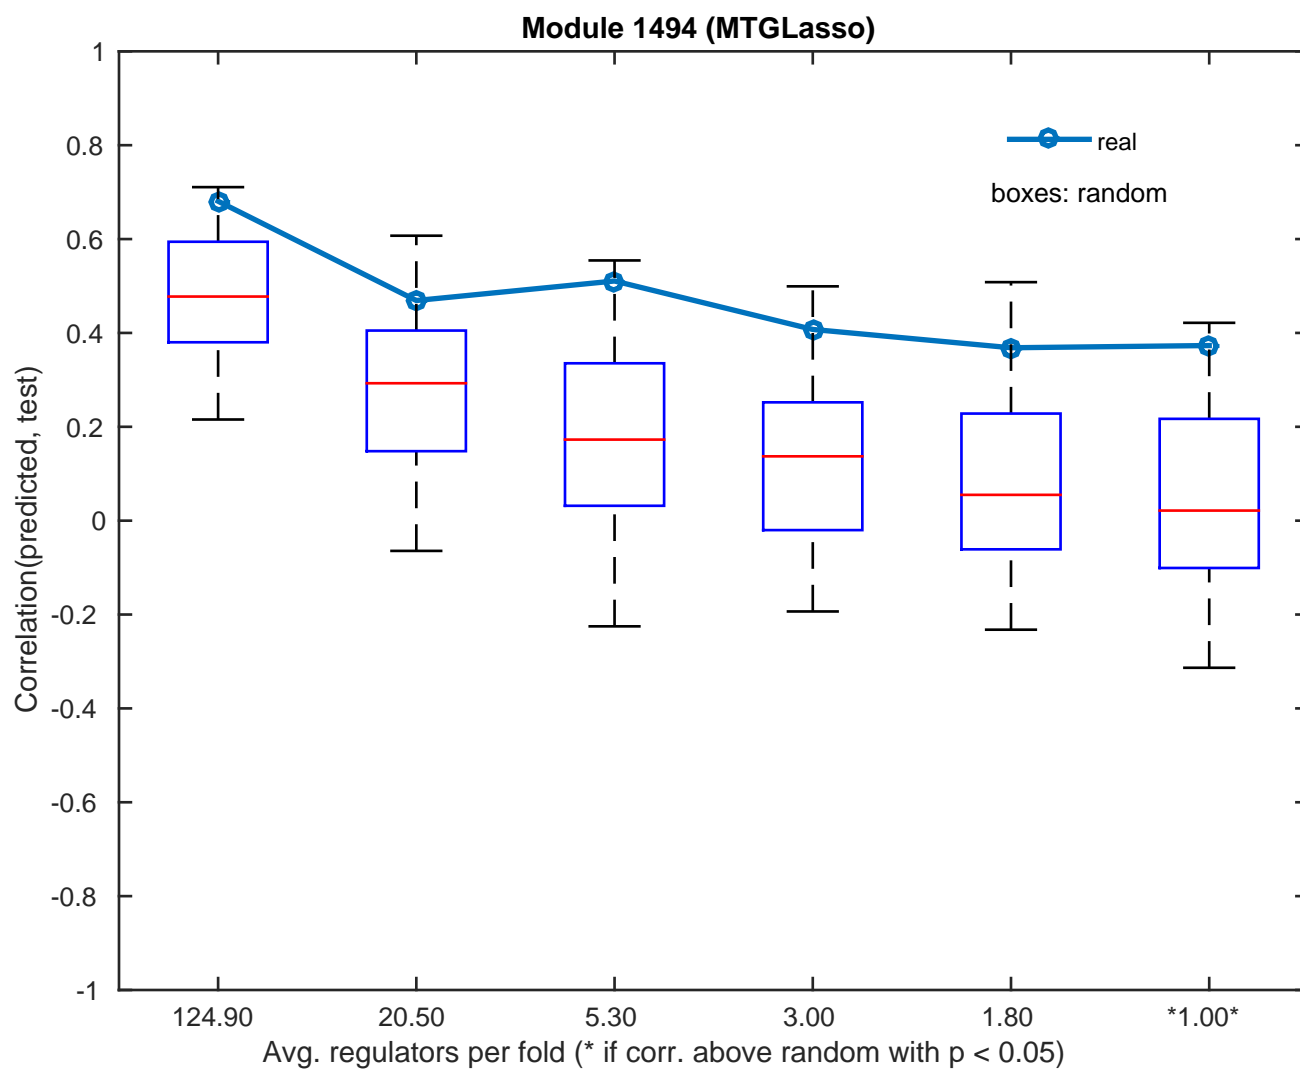

Supplement: S24 (10.1371/journal.pcbi.1005013.s024) [file journal.pcbi.1005013.s024]

Module 3029 (MTGLasso)

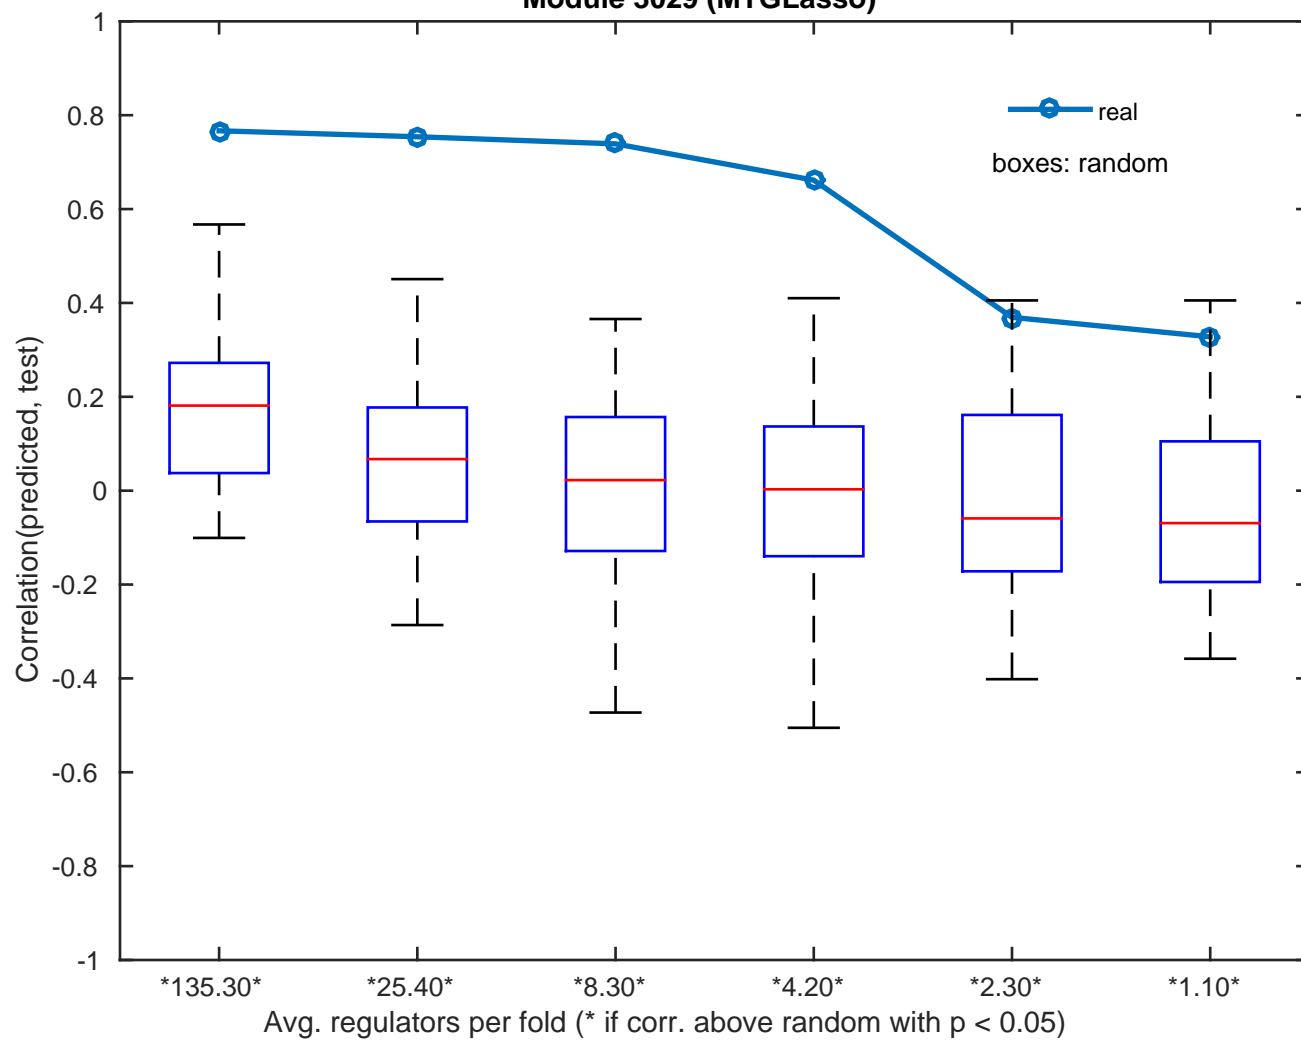

Supplement: S24 (10.1371/journal.pcbi.1005013.s024) [file journal.pcbi.1005013.s024]

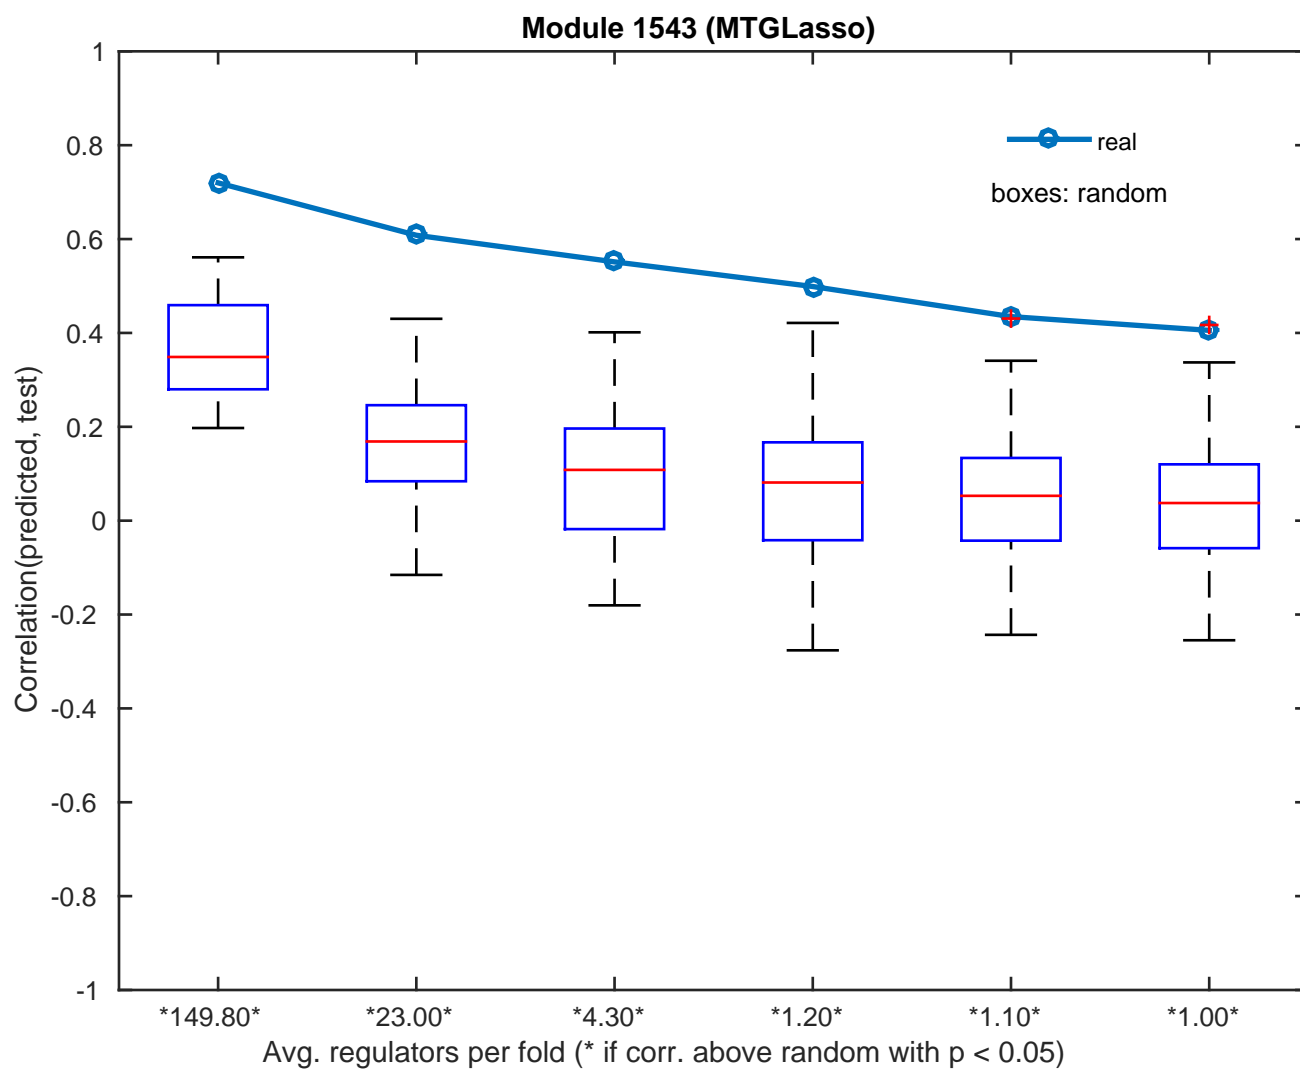

Supplement: S24 (10.1371/journal.pcbi.1005013.s024) [file journal.pcbi.1005013.s024]

Module 2950 (MTGLasso)

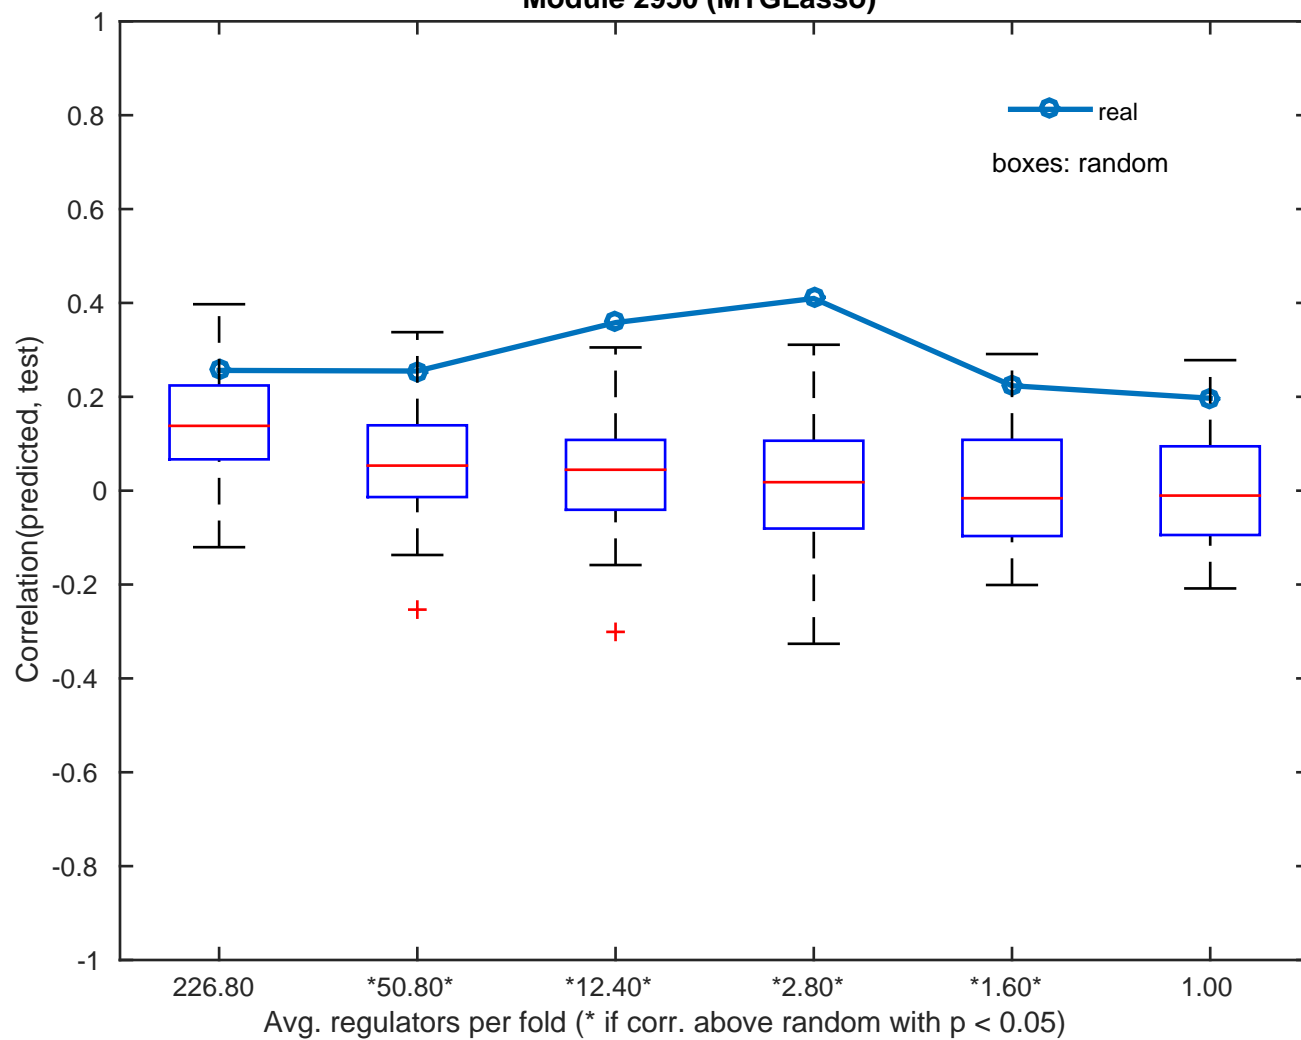

Supplement: S24 (10.1371/journal.pcbi.1005013.s024) [file journal.pcbi.1005013.s024]

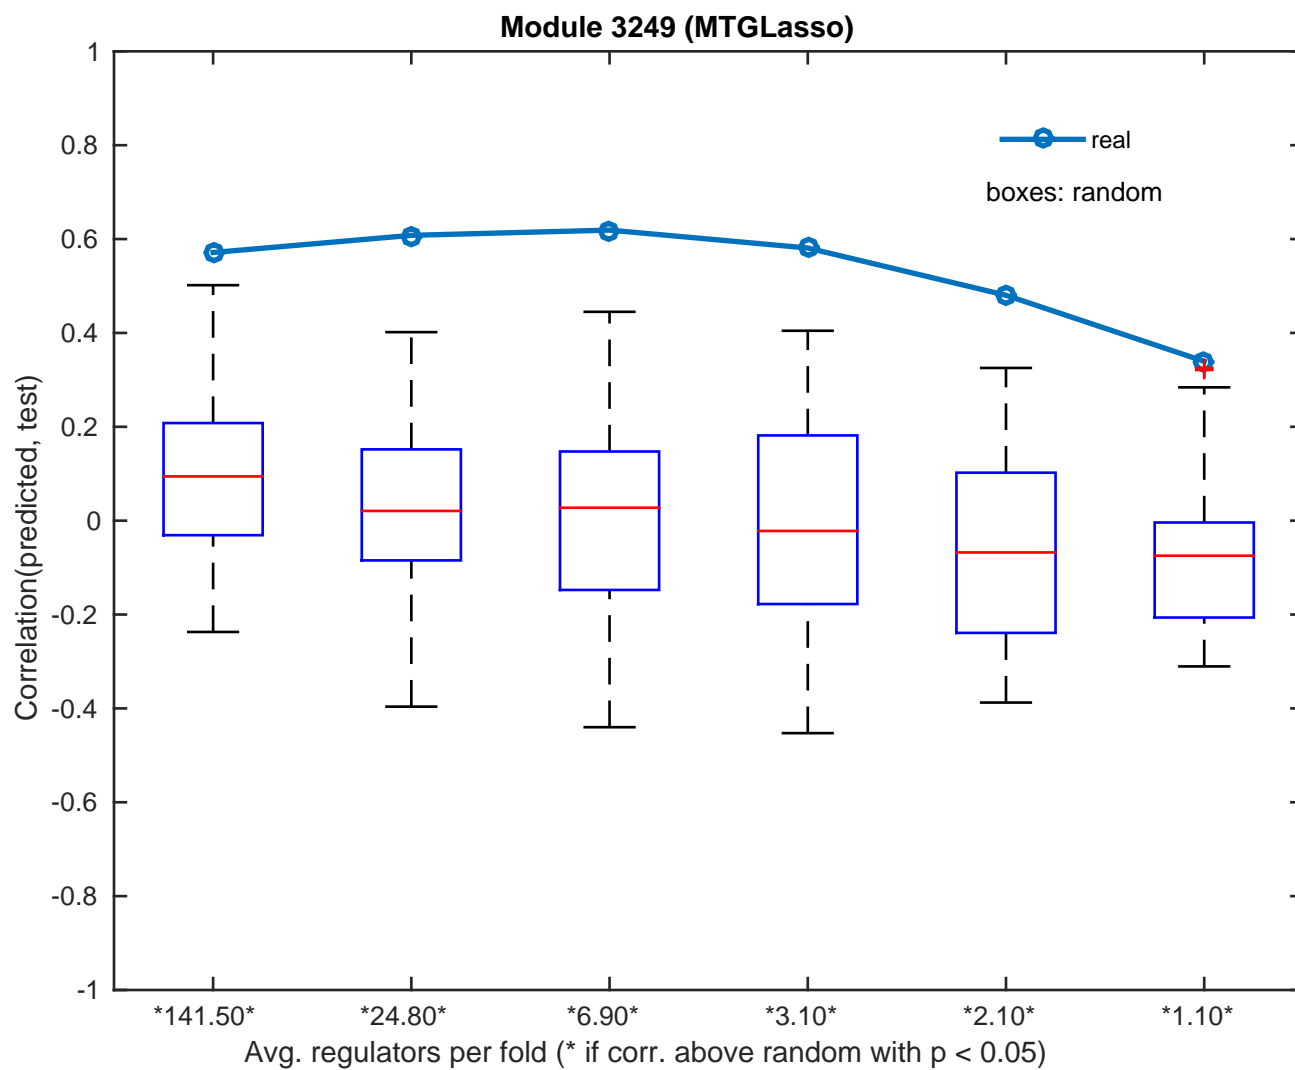

Supplement: S24 (10.1371/journal.pcbi.1005013.s024) [file journal.pcbi.1005013.s024]

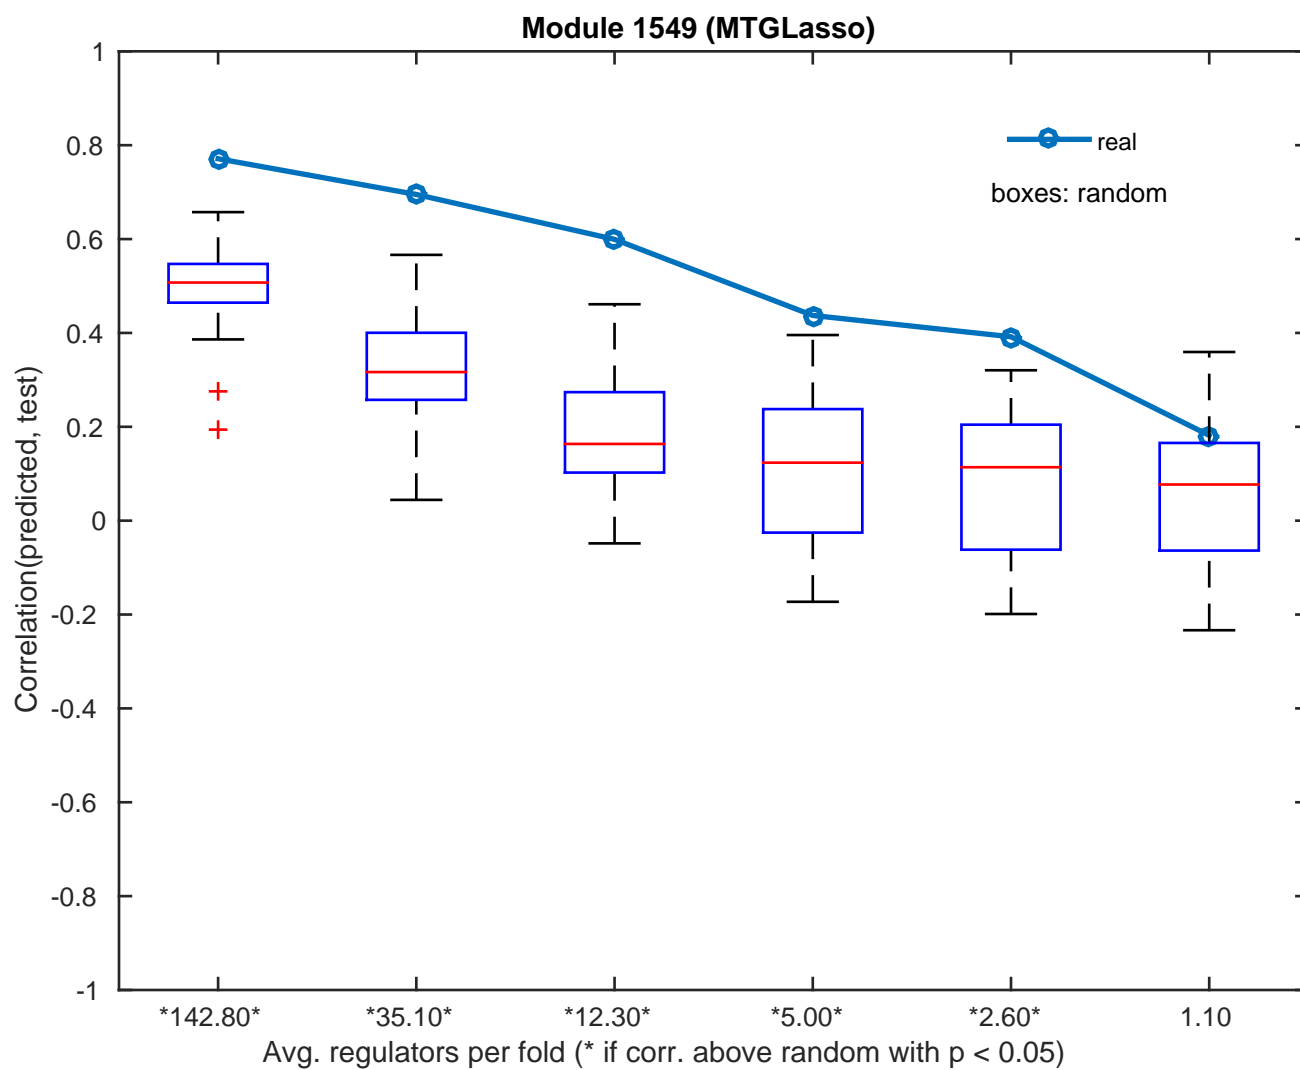

Supplement: S24 (10.1371/journal.pcbi.1005013.s024) [file journal.pcbi.1005013.s024]

Module 3134 (MTGLasso)

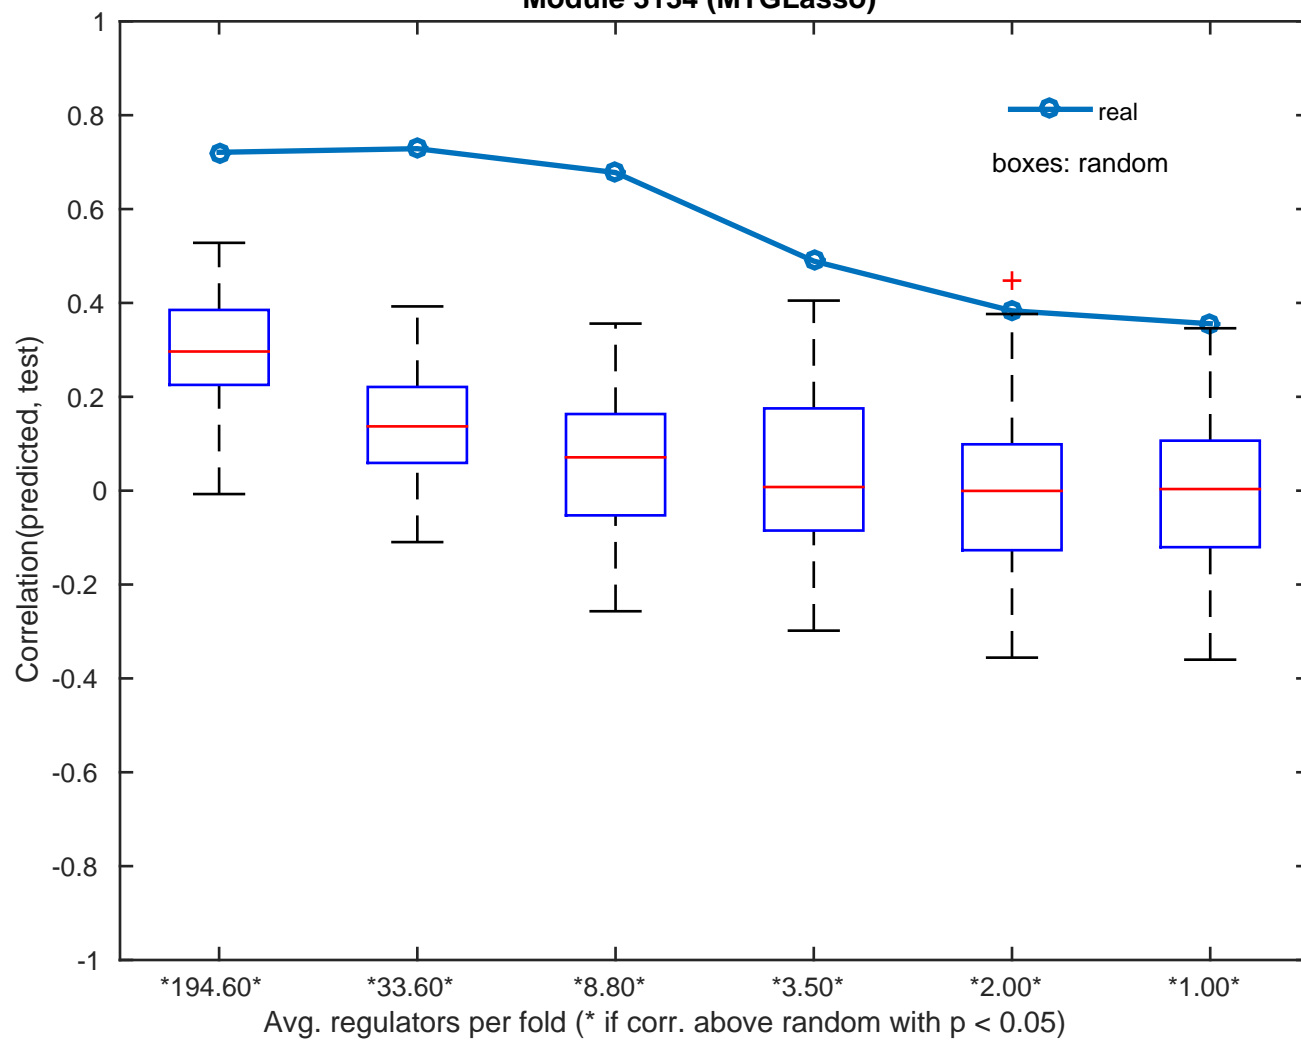

Supplement: S24 (10.1371/journal.pcbi.1005013.s024) [file journal.pcbi.1005013.s024]

Module 3058 (MTGLasso)

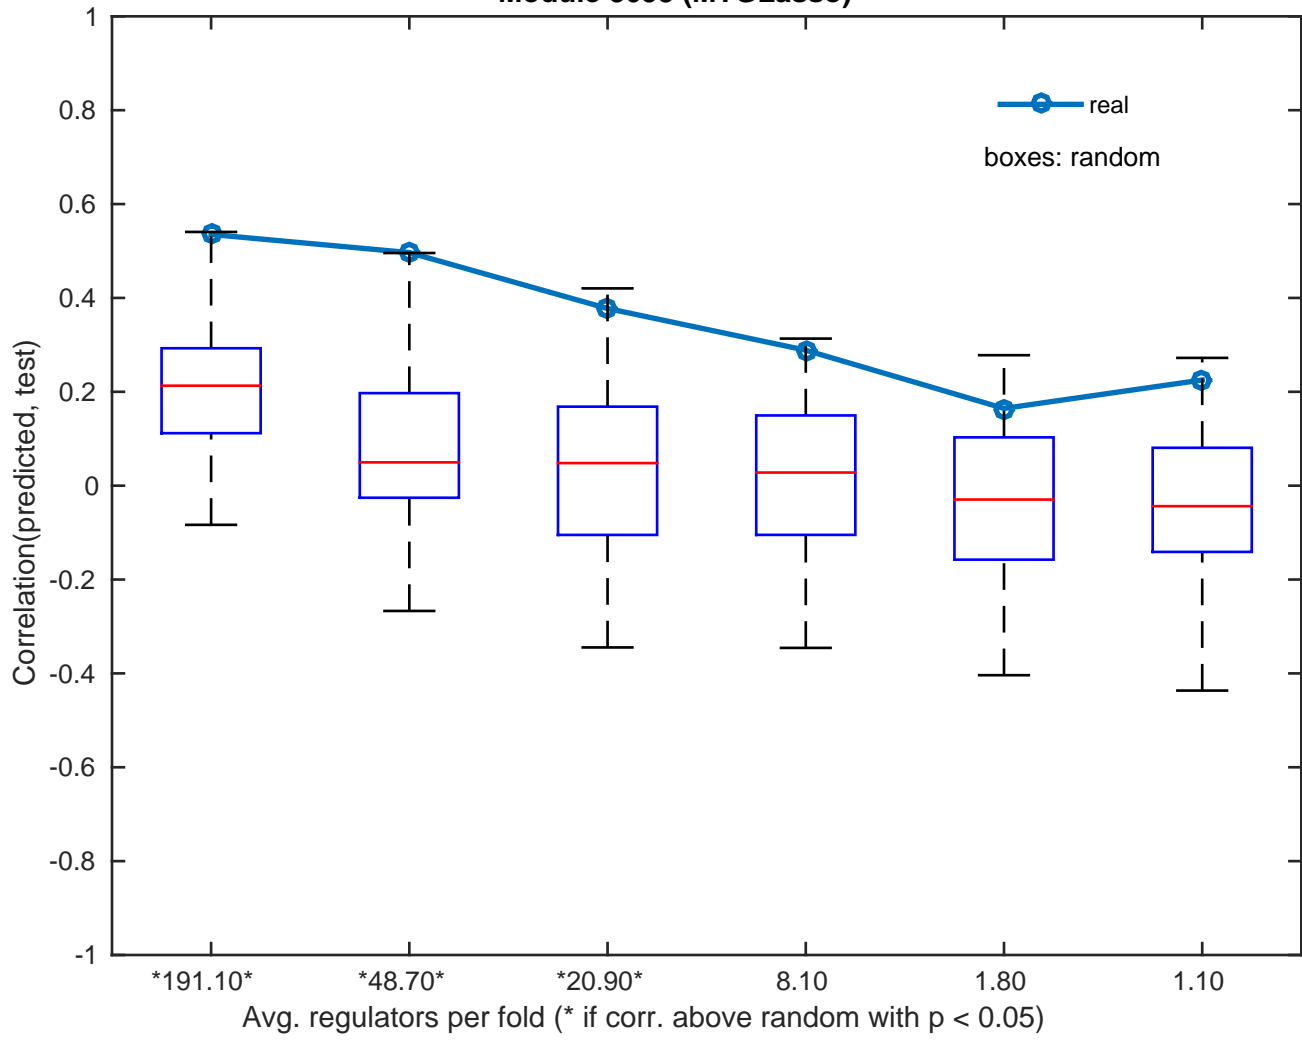

Supplement: S24 (10.1371/journal.pcbi.1005013.s024) [file journal.pcbi.1005013.s024]

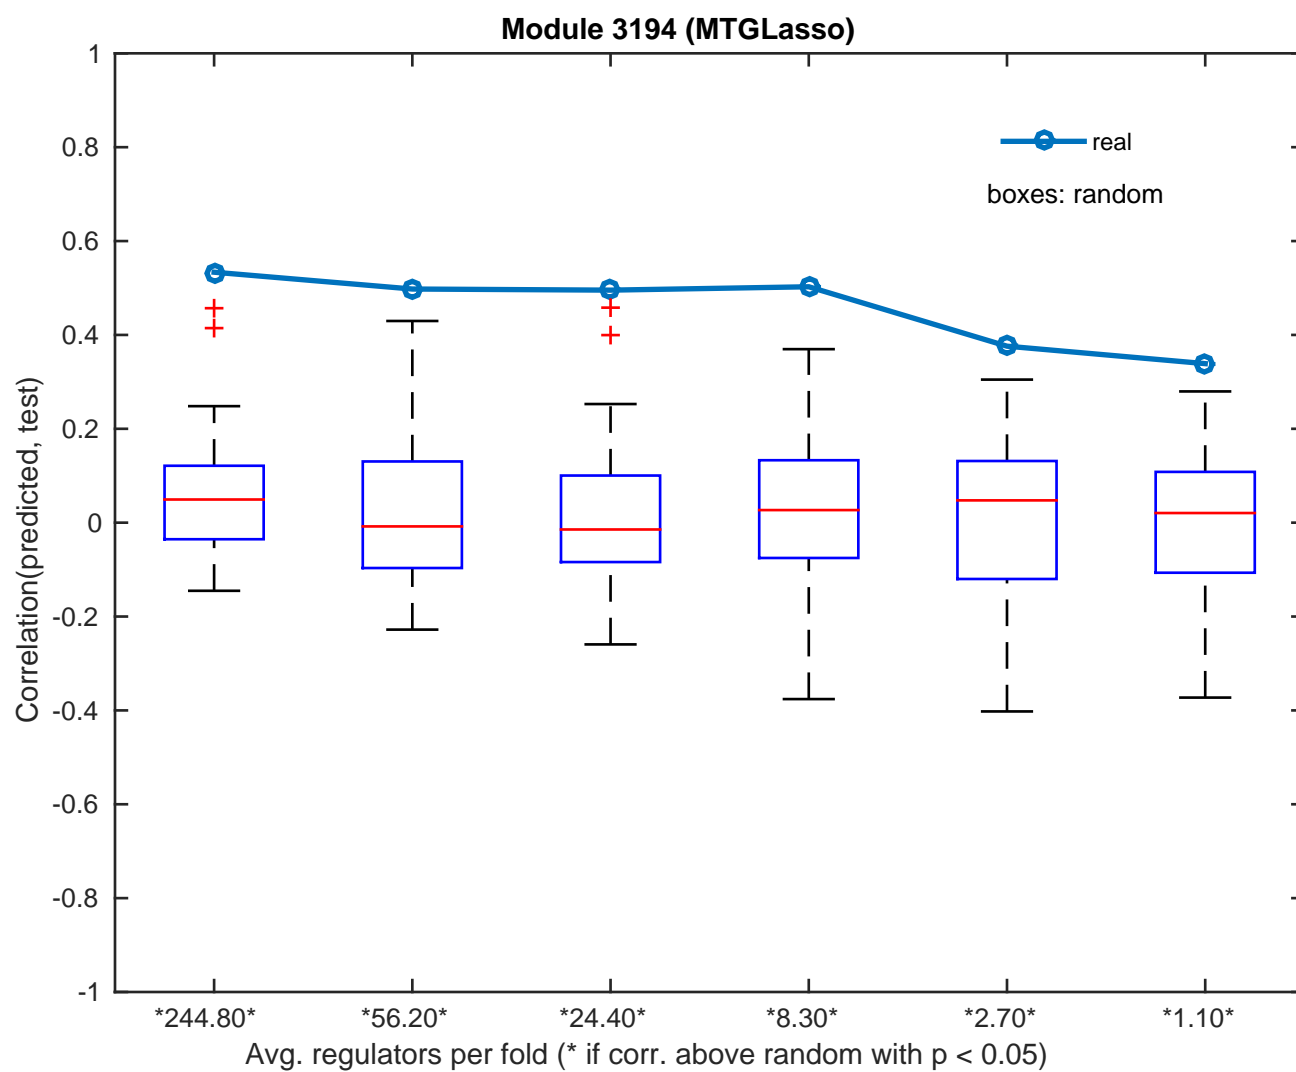

Supplement: S24 (10.1371/journal.pcbi.1005013.s024) [file journal.pcbi.1005013.s024]

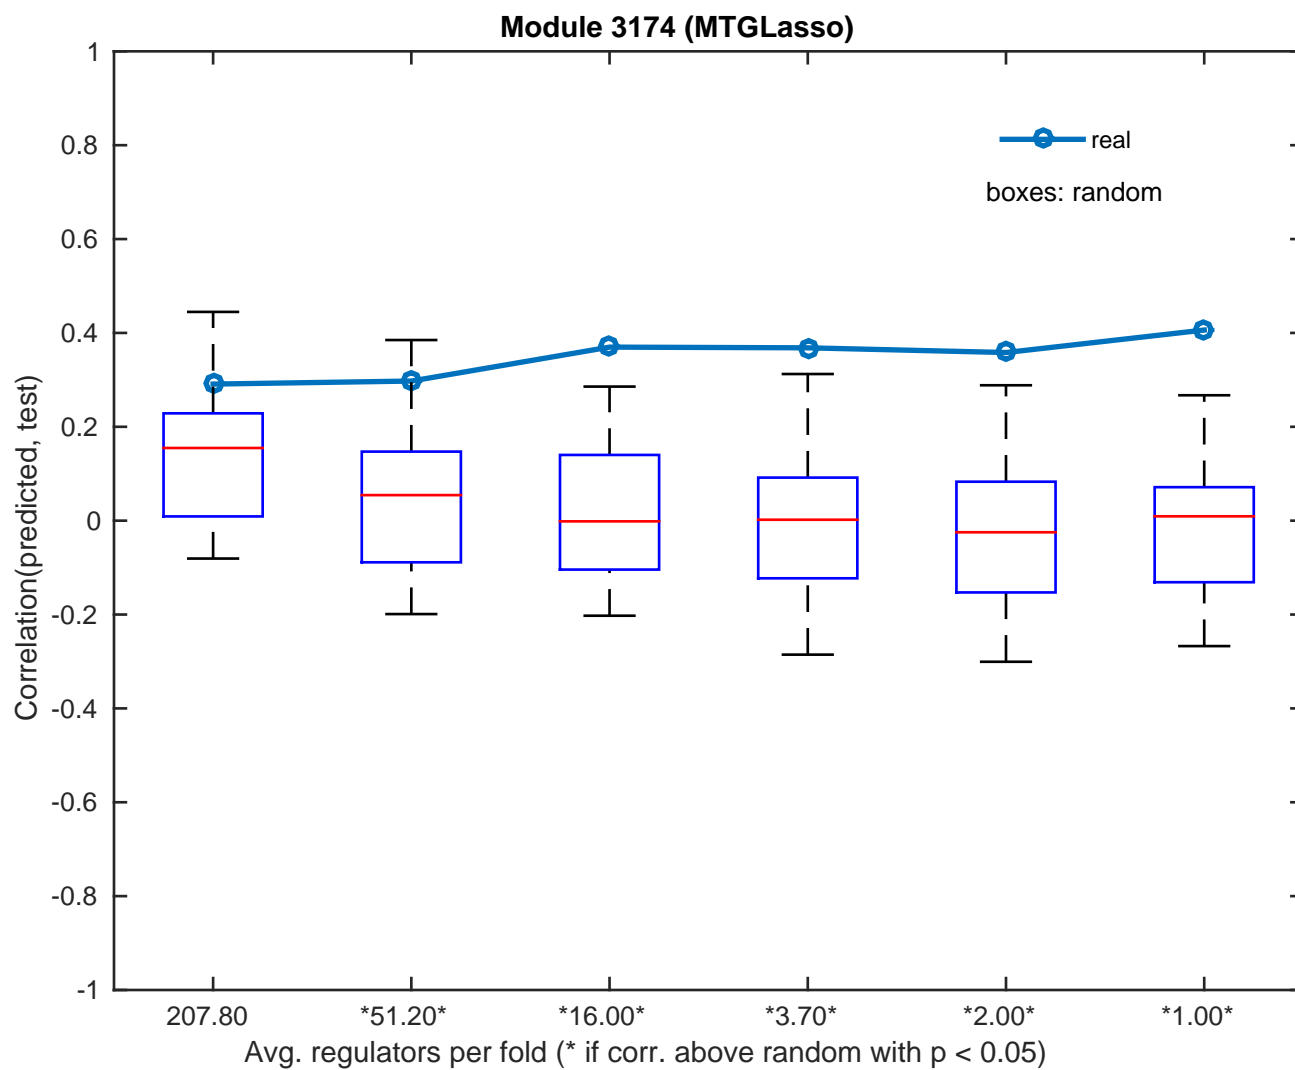

Supplement: S24 (10.1371/journal.pcbi.1005013.s024) [file journal.pcbi.1005013.s024]

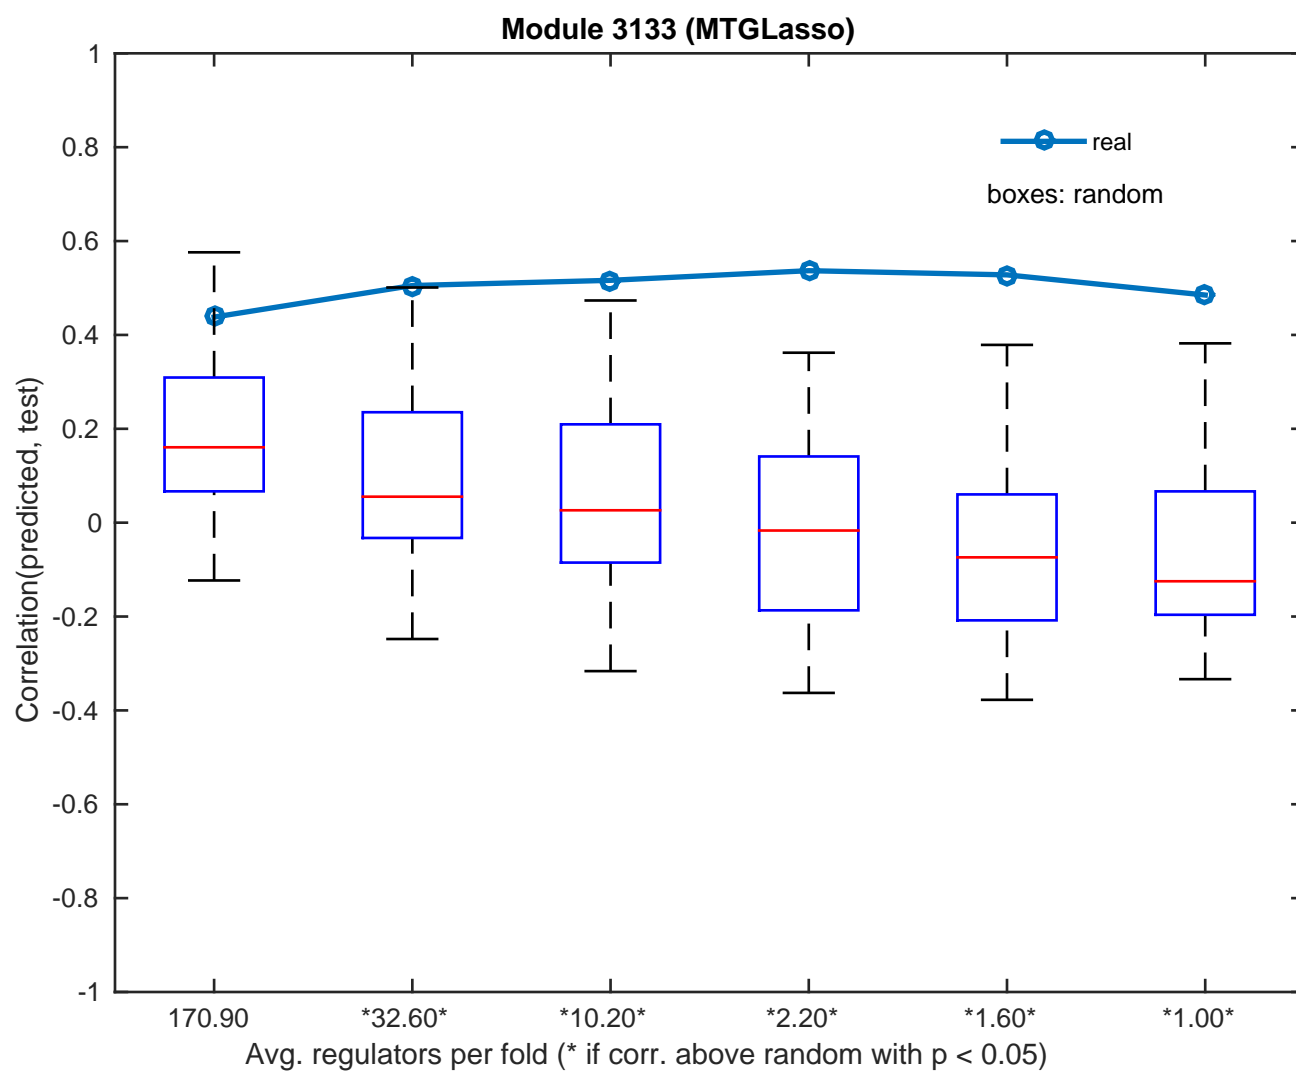

Supplement: S24 (10.1371/journal.pcbi.1005013.s024) [file journal.pcbi.1005013.s024]

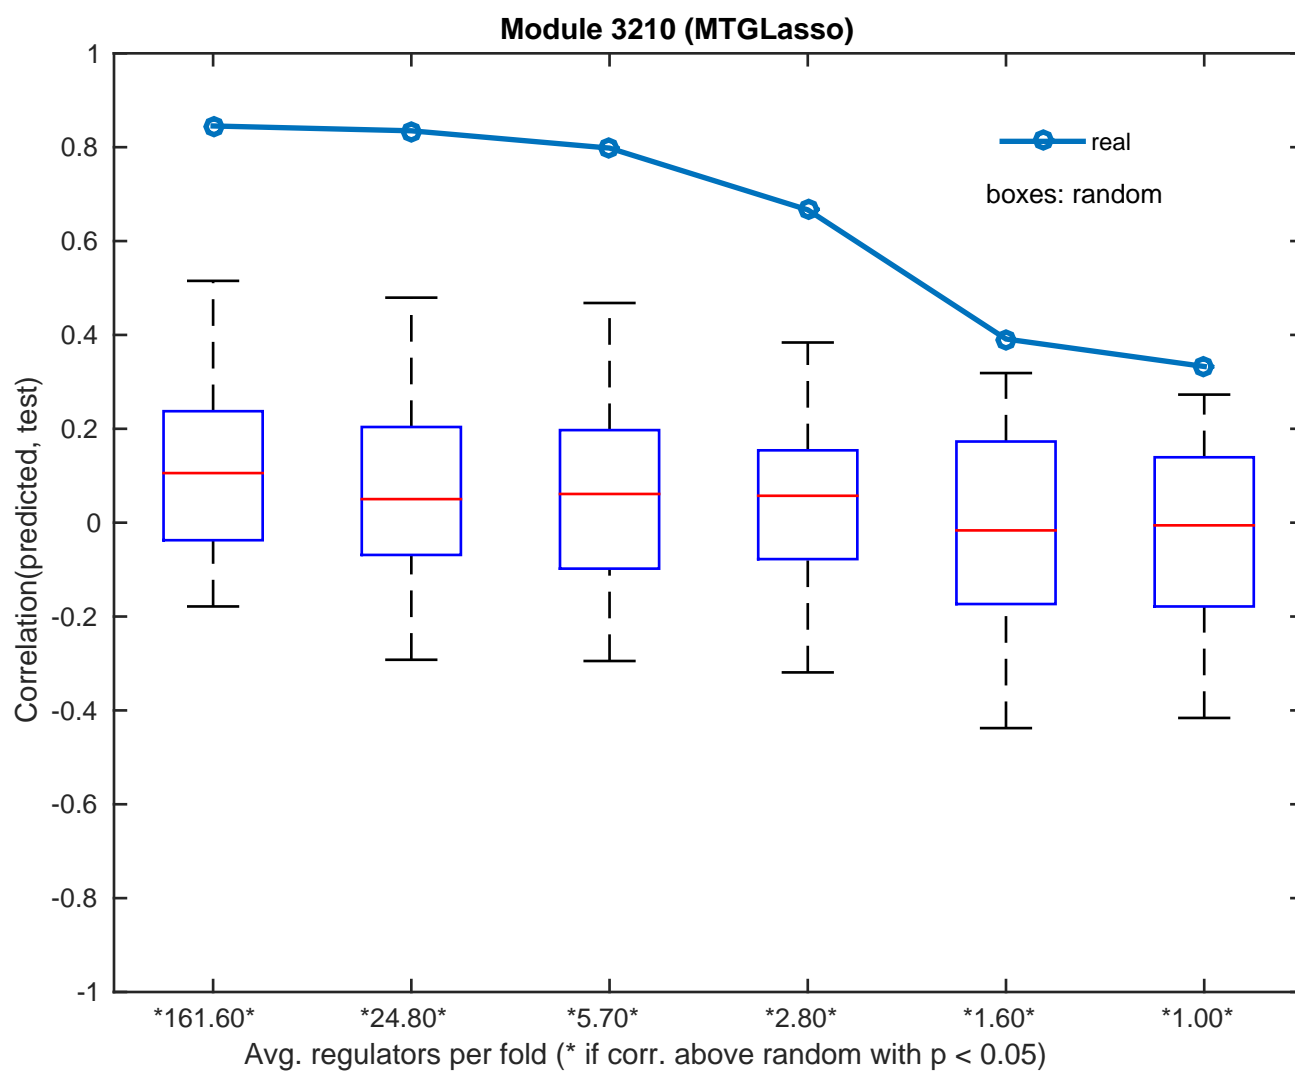

Supplement: S24 (10.1371/journal.pcbi.1005013.s024) [file journal.pcbi.1005013.s024]

Module 3189 (MTGLasso)

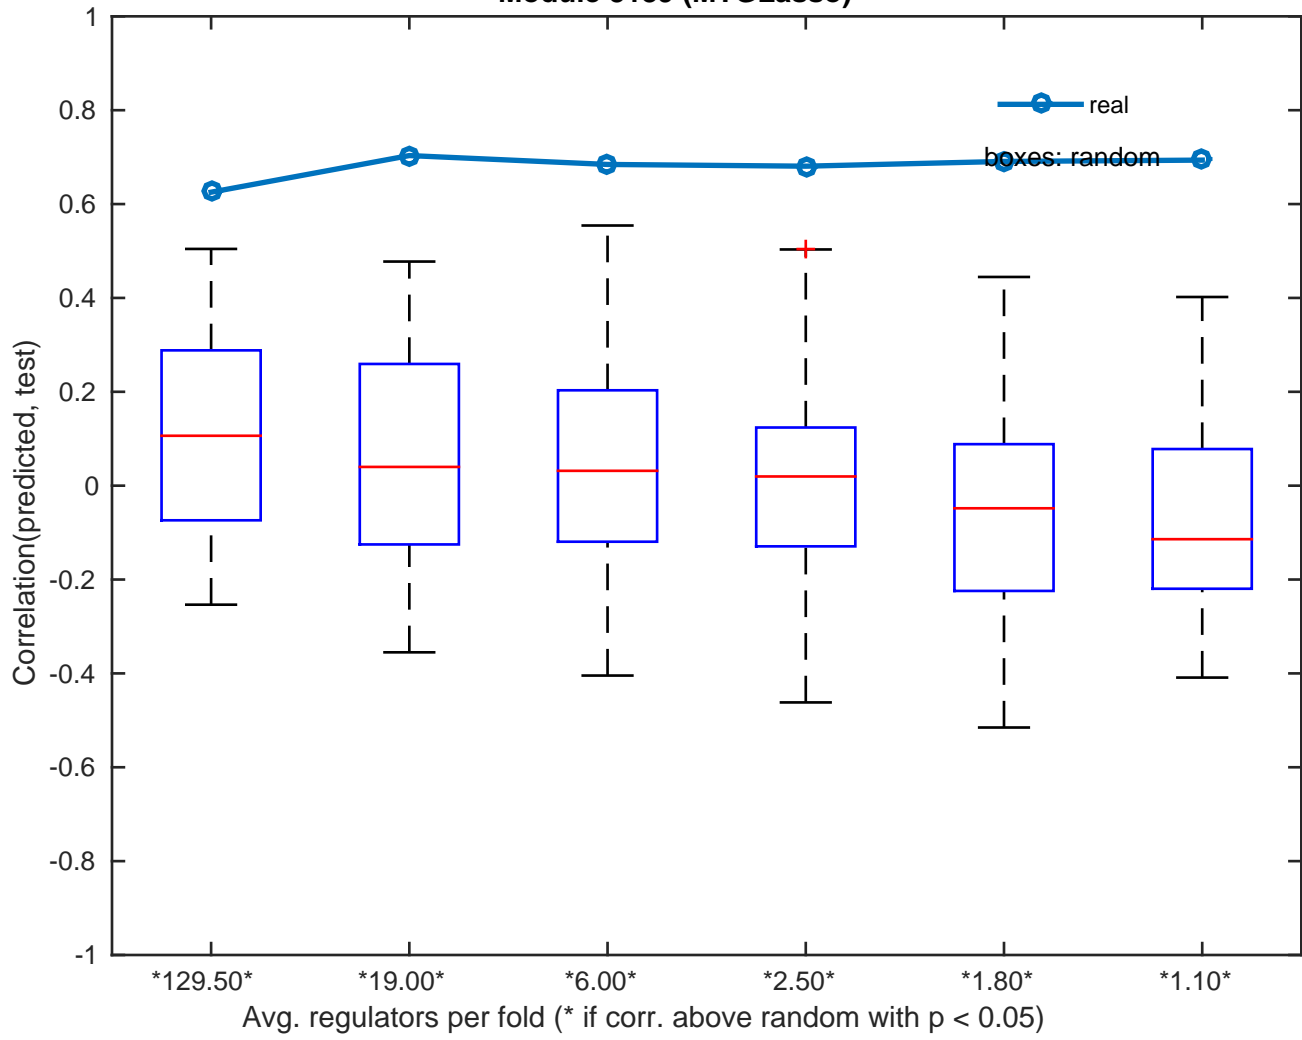

Supplement: S24 (10.1371/journal.pcbi.1005013.s024) [file journal.pcbi.1005013.s024]

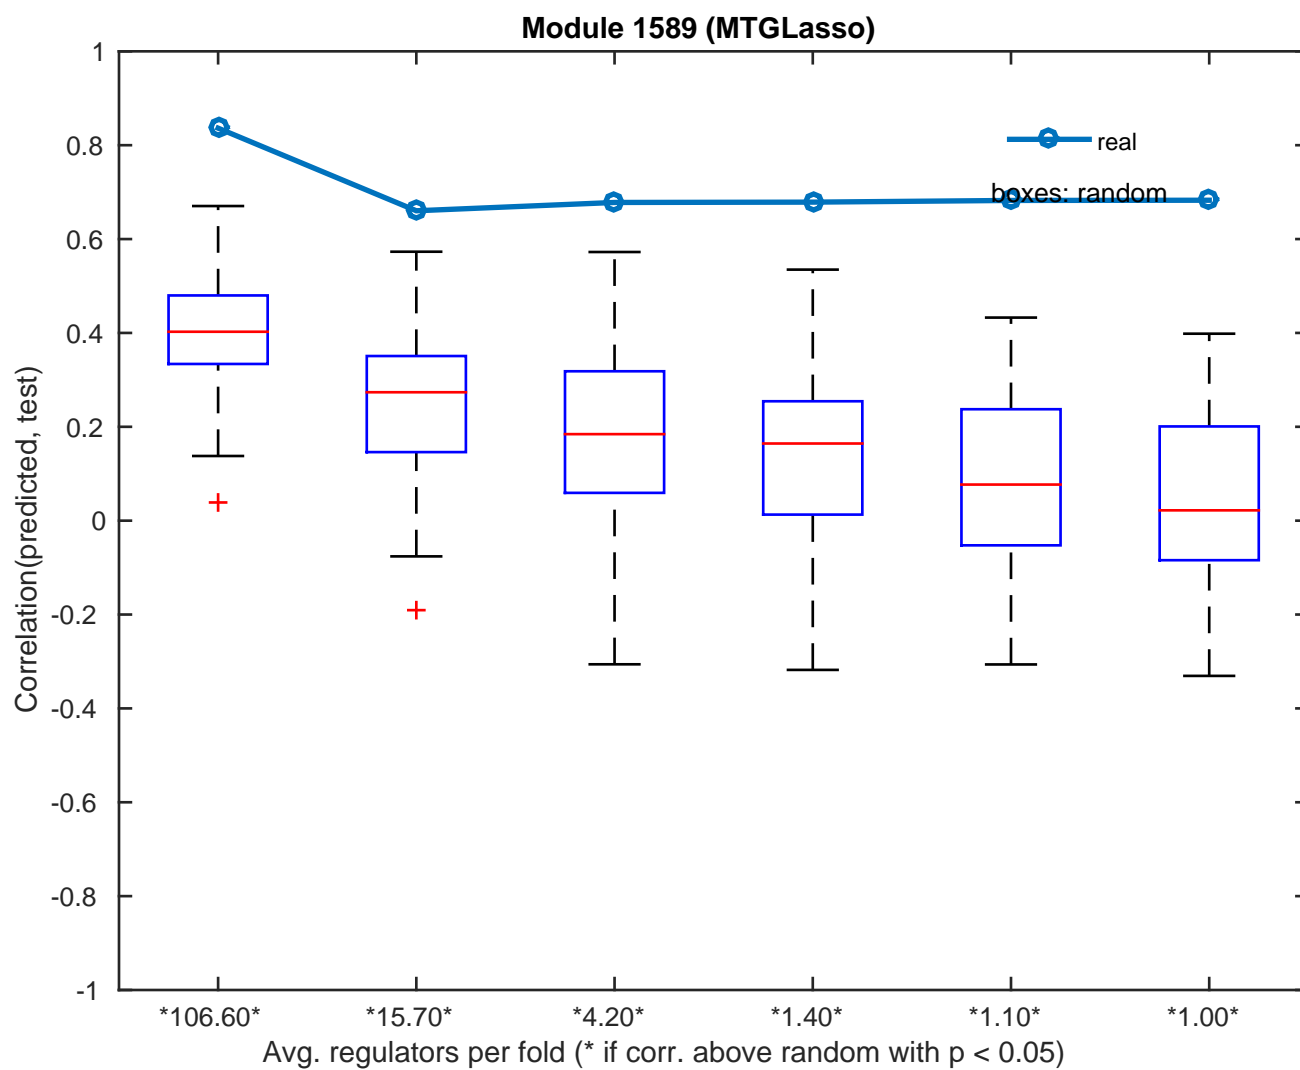

Supplement: S24 (10.1371/journal.pcbi.1005013.s024) [file journal.pcbi.1005013.s024]

Module 1501 (MTGLasso)

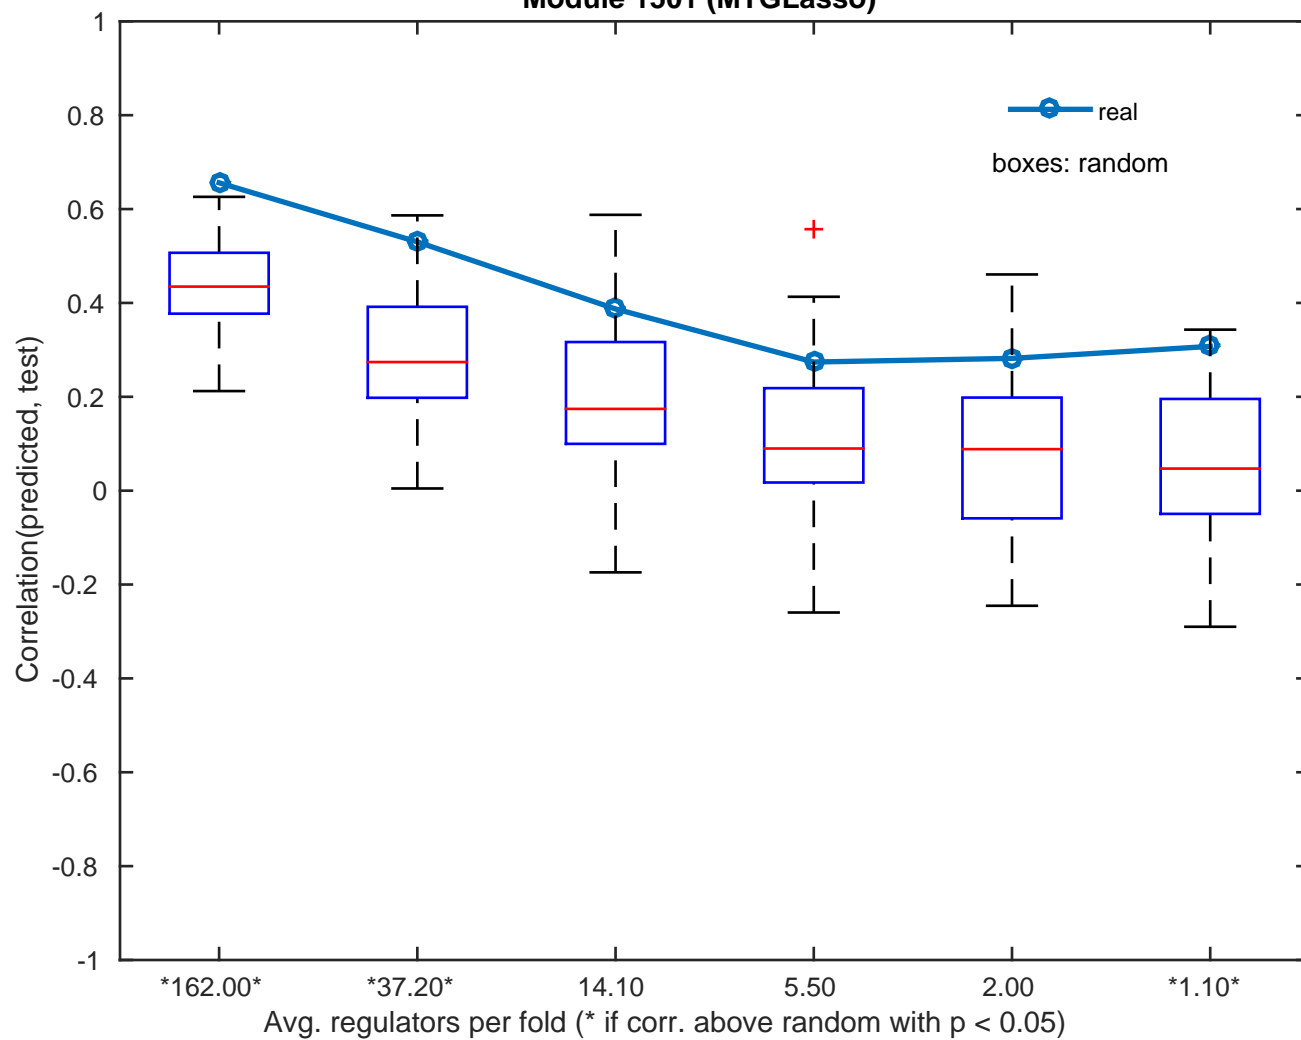

Supplement: S24 (10.1371/journal.pcbi.1005013.s024) [file journal.pcbi.1005013.s024]

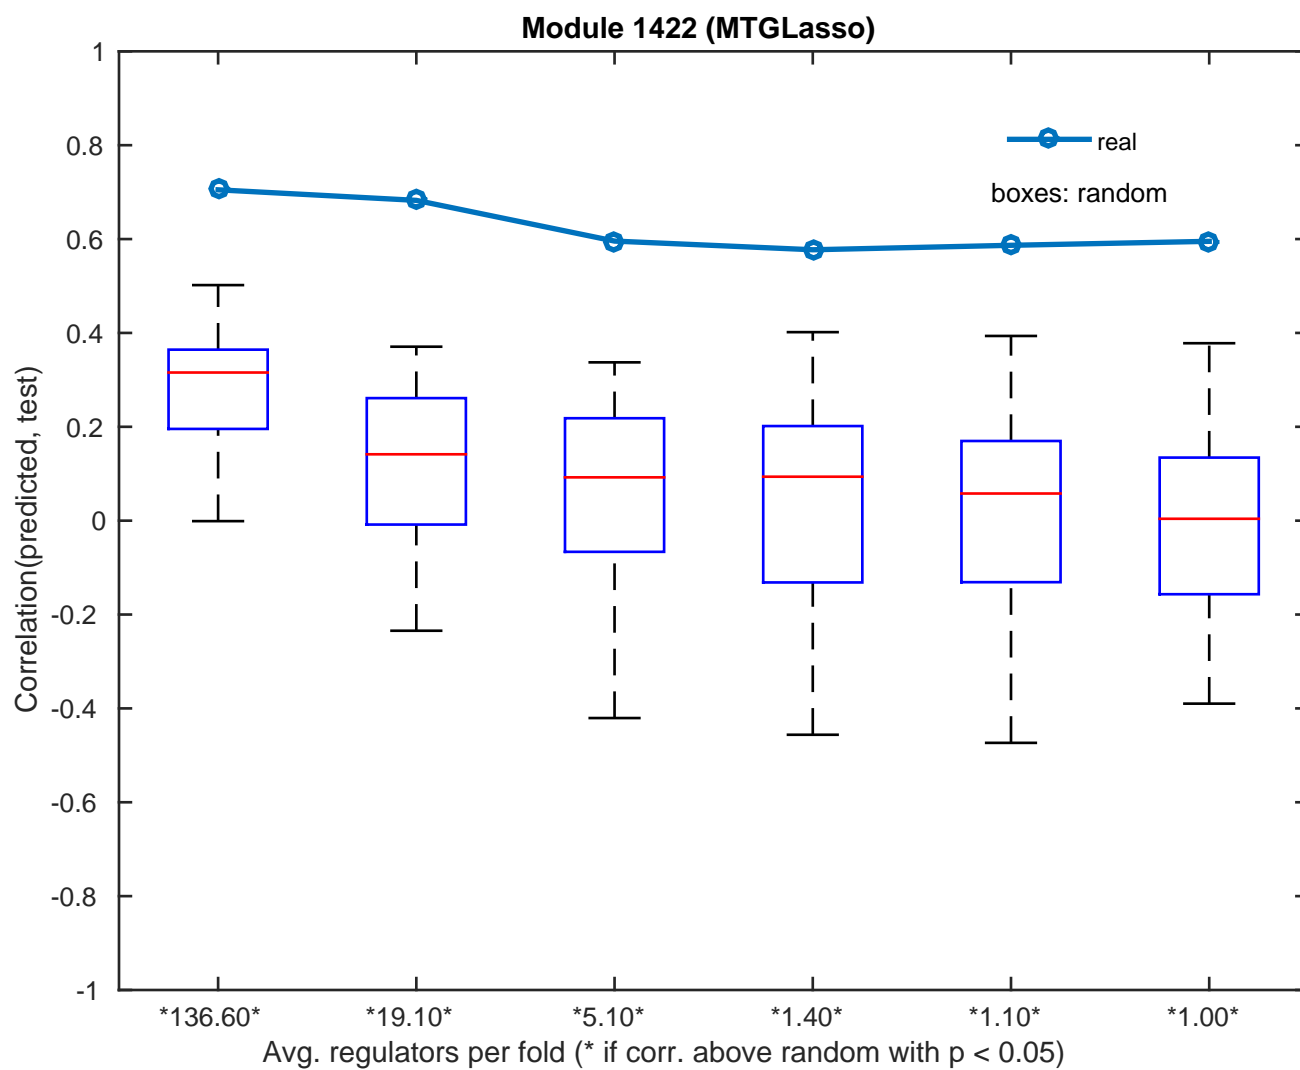

Supplement: S24 (10.1371/journal.pcbi.1005013.s024) [file journal.pcbi.1005013.s024]

Module 1499 (MTGLasso)

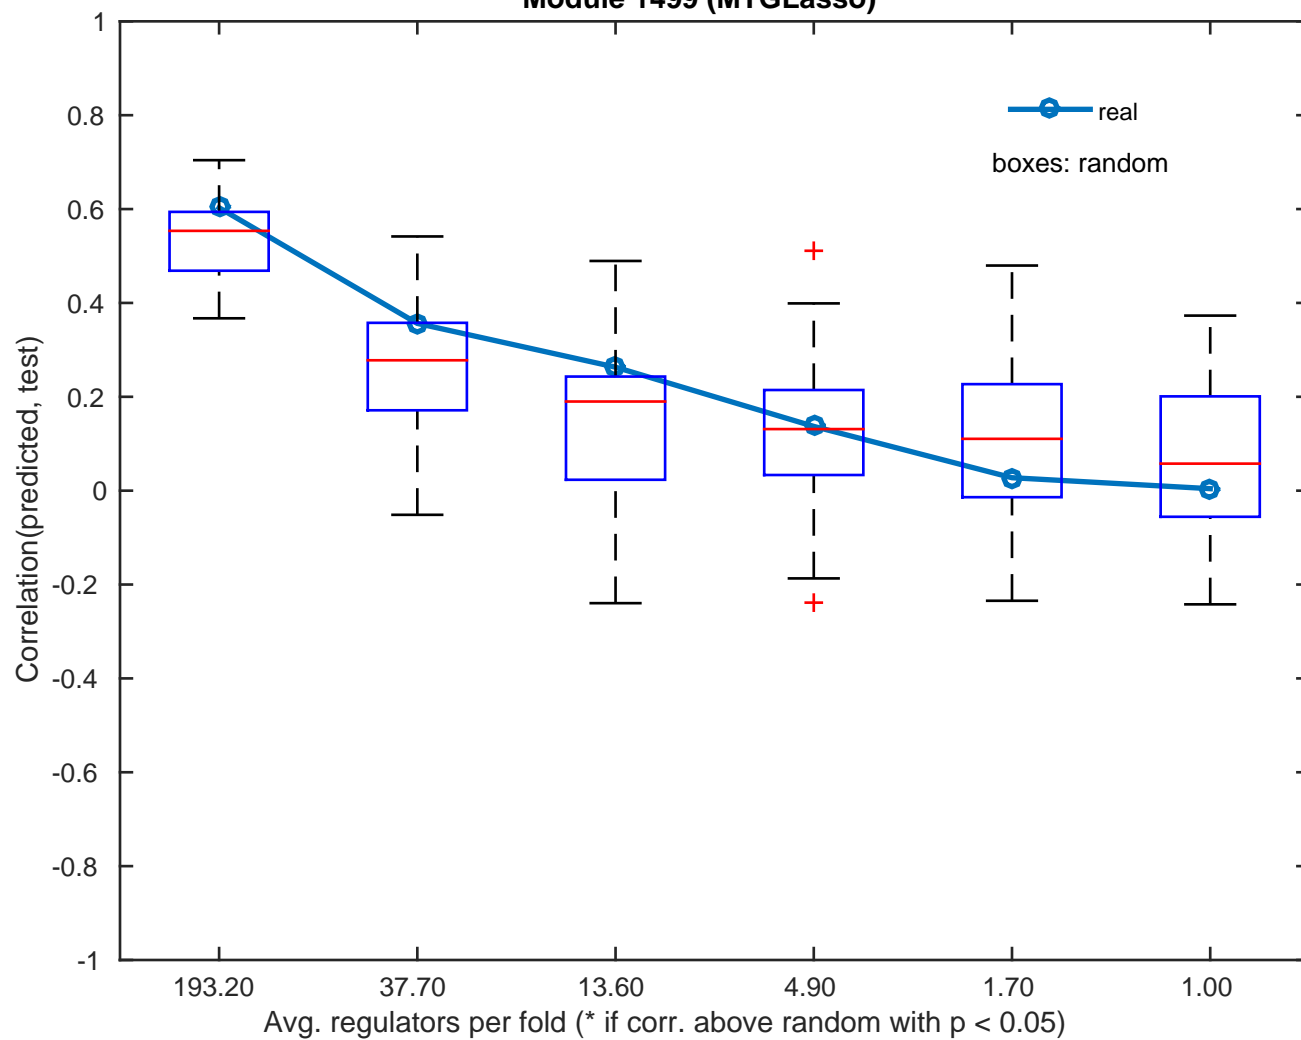

Supplement: S24 (10.1371/journal.pcbi.1005013.s024) [file journal.pcbi.1005013.s024]

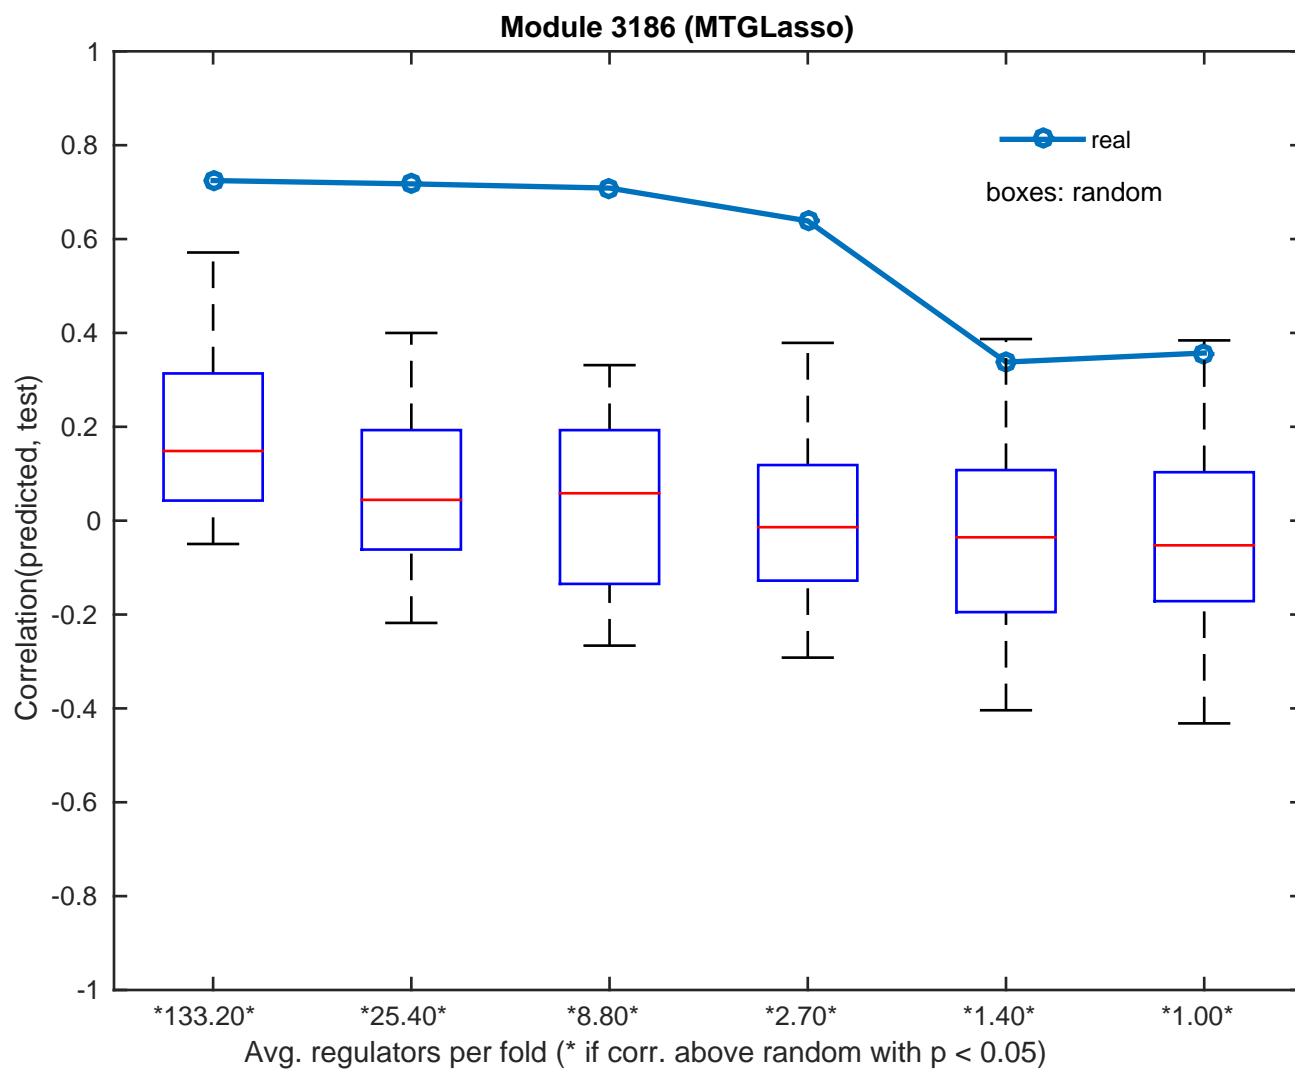

Supplement: S24 (10.1371/journal.pcbi.1005013.s024) [file journal.pcbi.1005013.s024]

Module 1590 (MTGLasso)

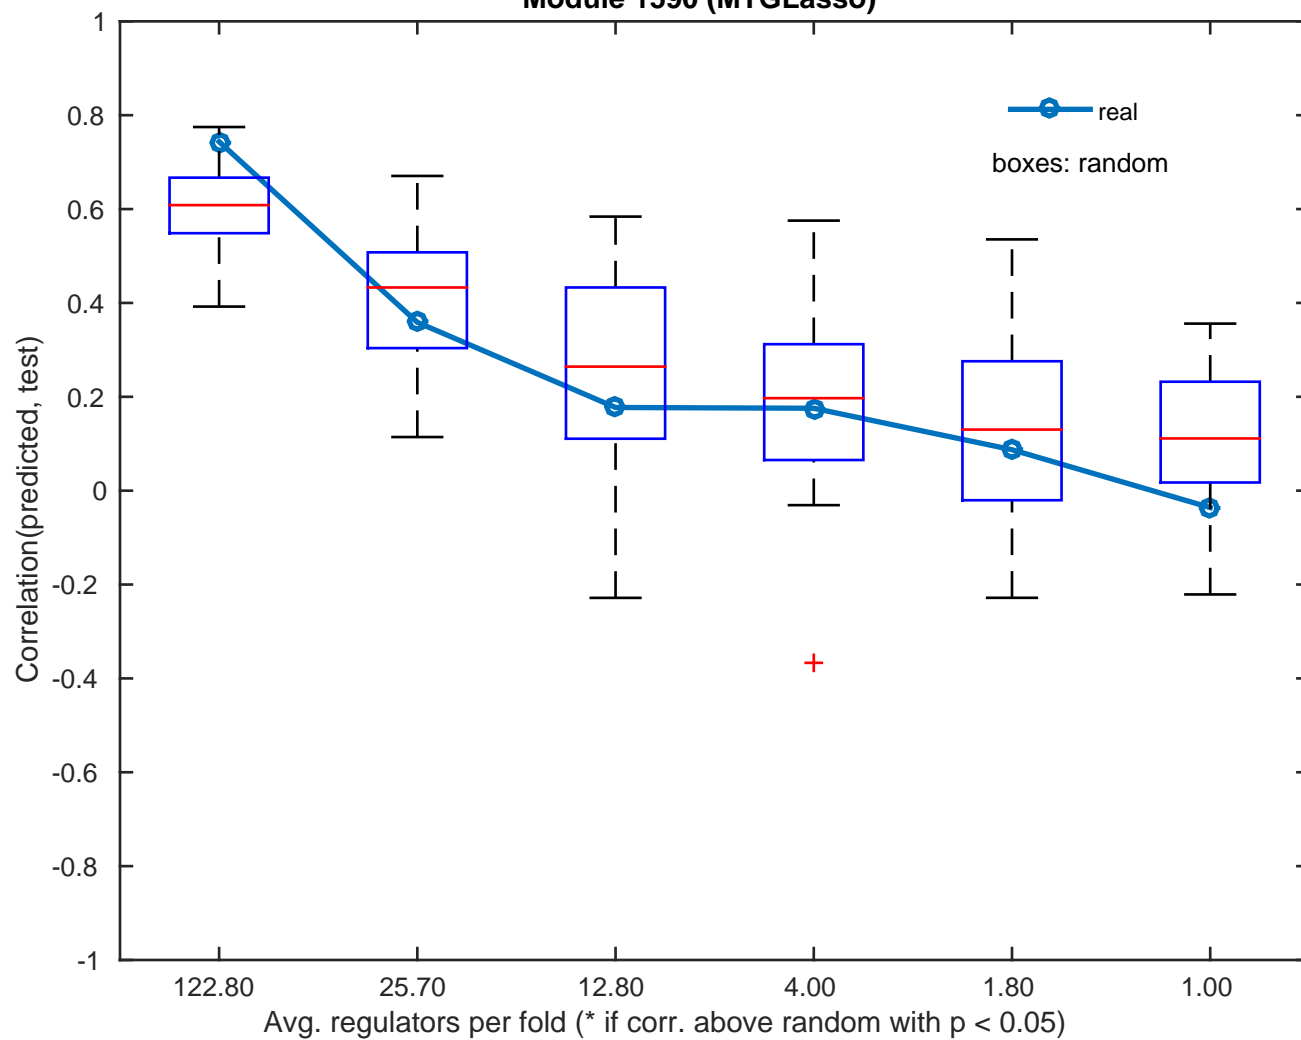

Supplement: S24 (10.1371/journal.pcbi.1005013.s024) [file journal.pcbi.1005013.s024]

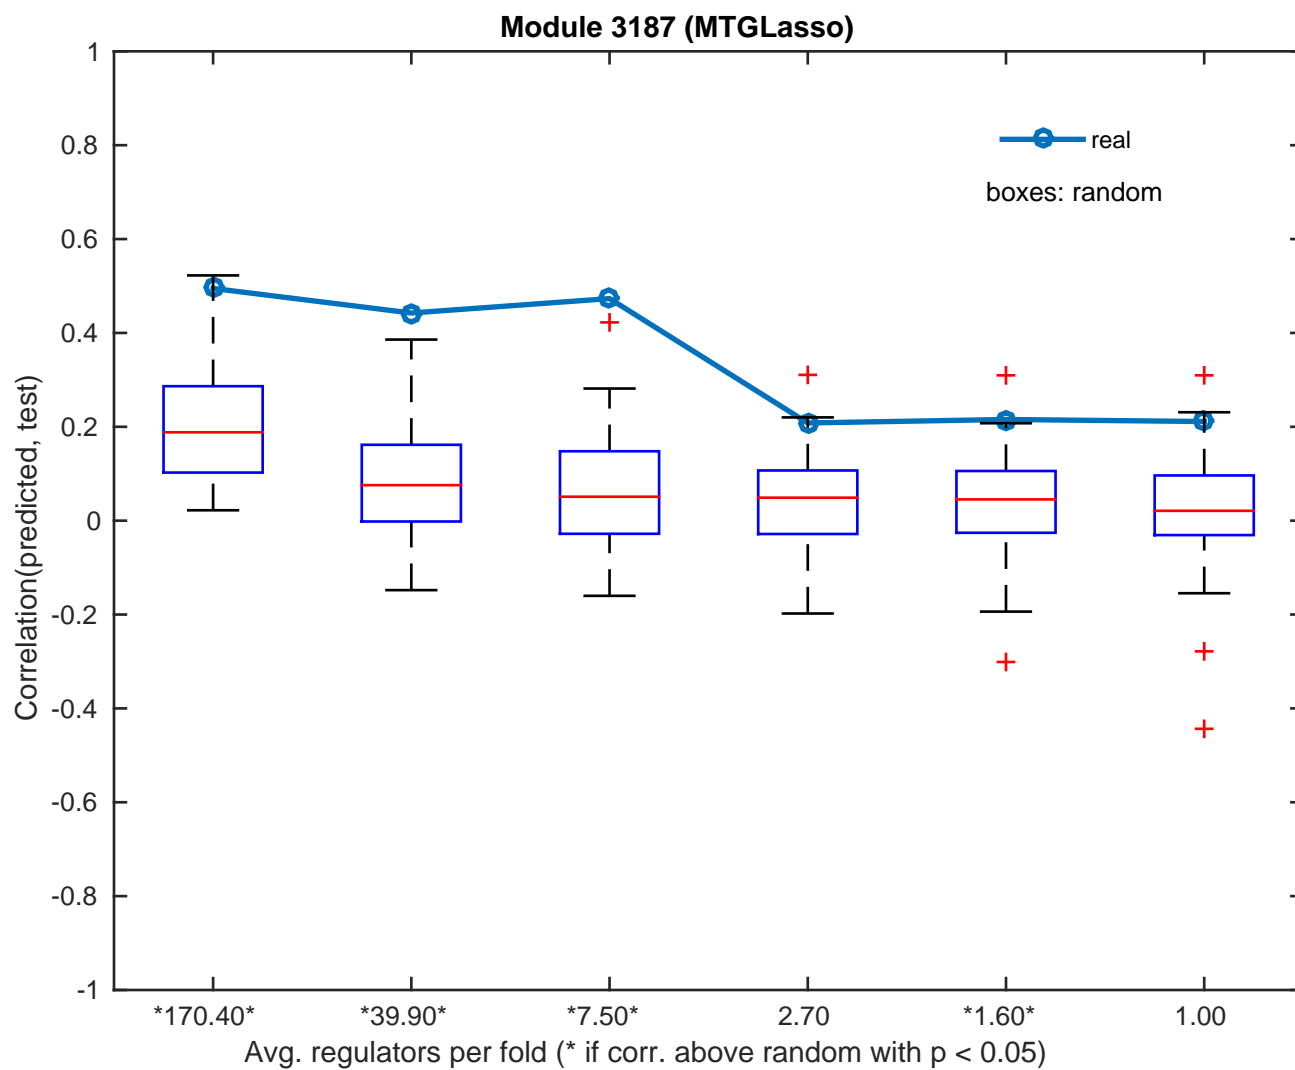

Supplement: S24 (10.1371/journal.pcbi.1005013.s024) [file journal.pcbi.1005013.s024]

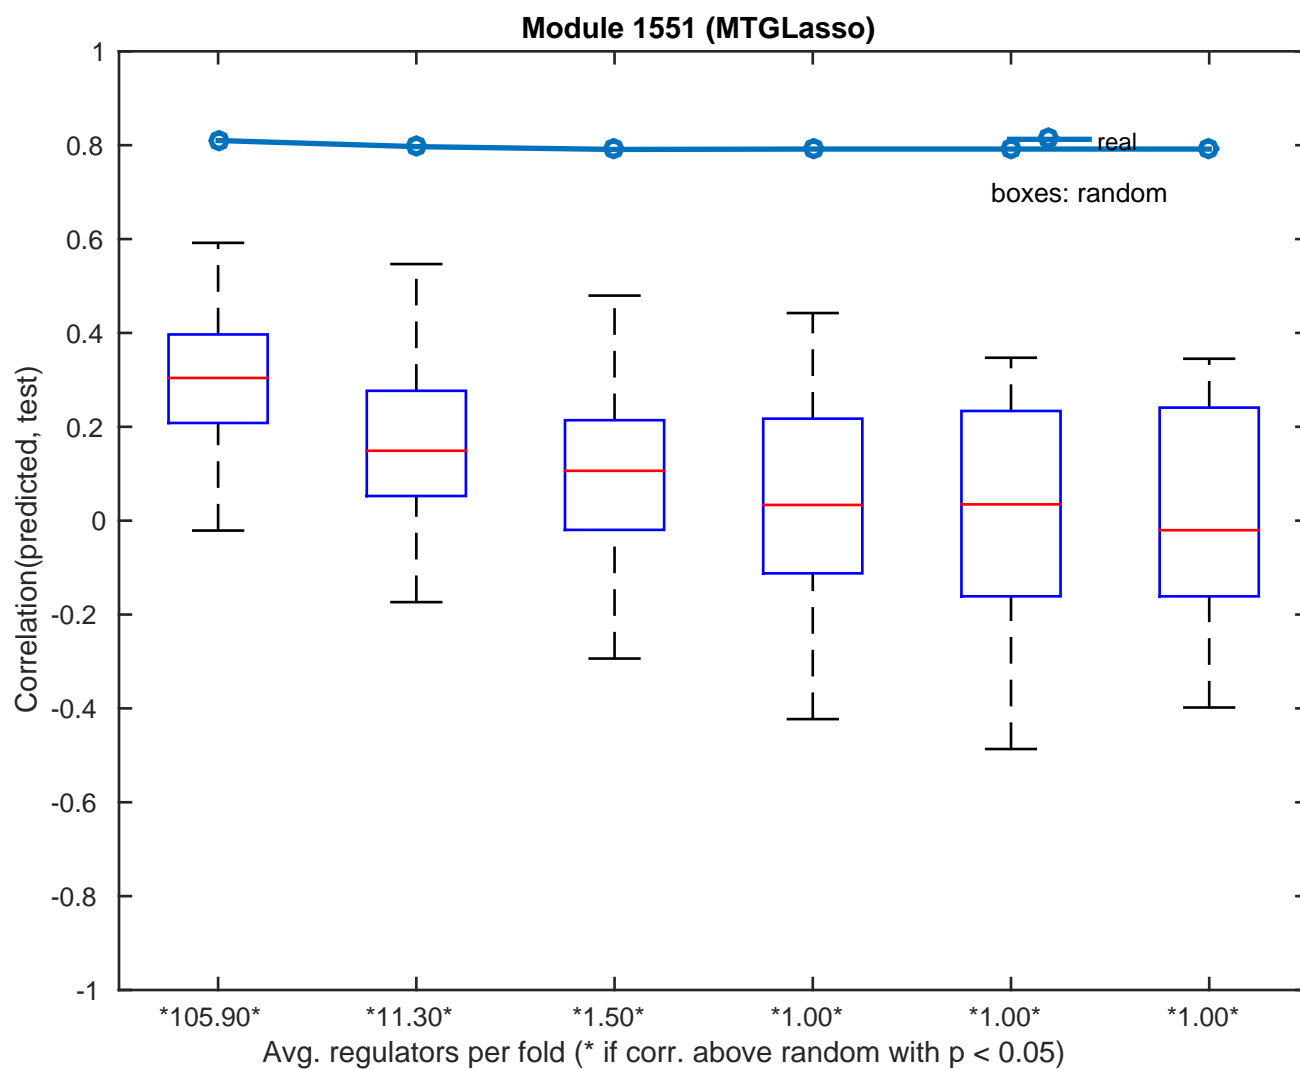

Supplement: S24 (10.1371/journal.pcbi.1005013.s024) [file journal.pcbi.1005013.s024]

Module 3070 (MTGLasso)

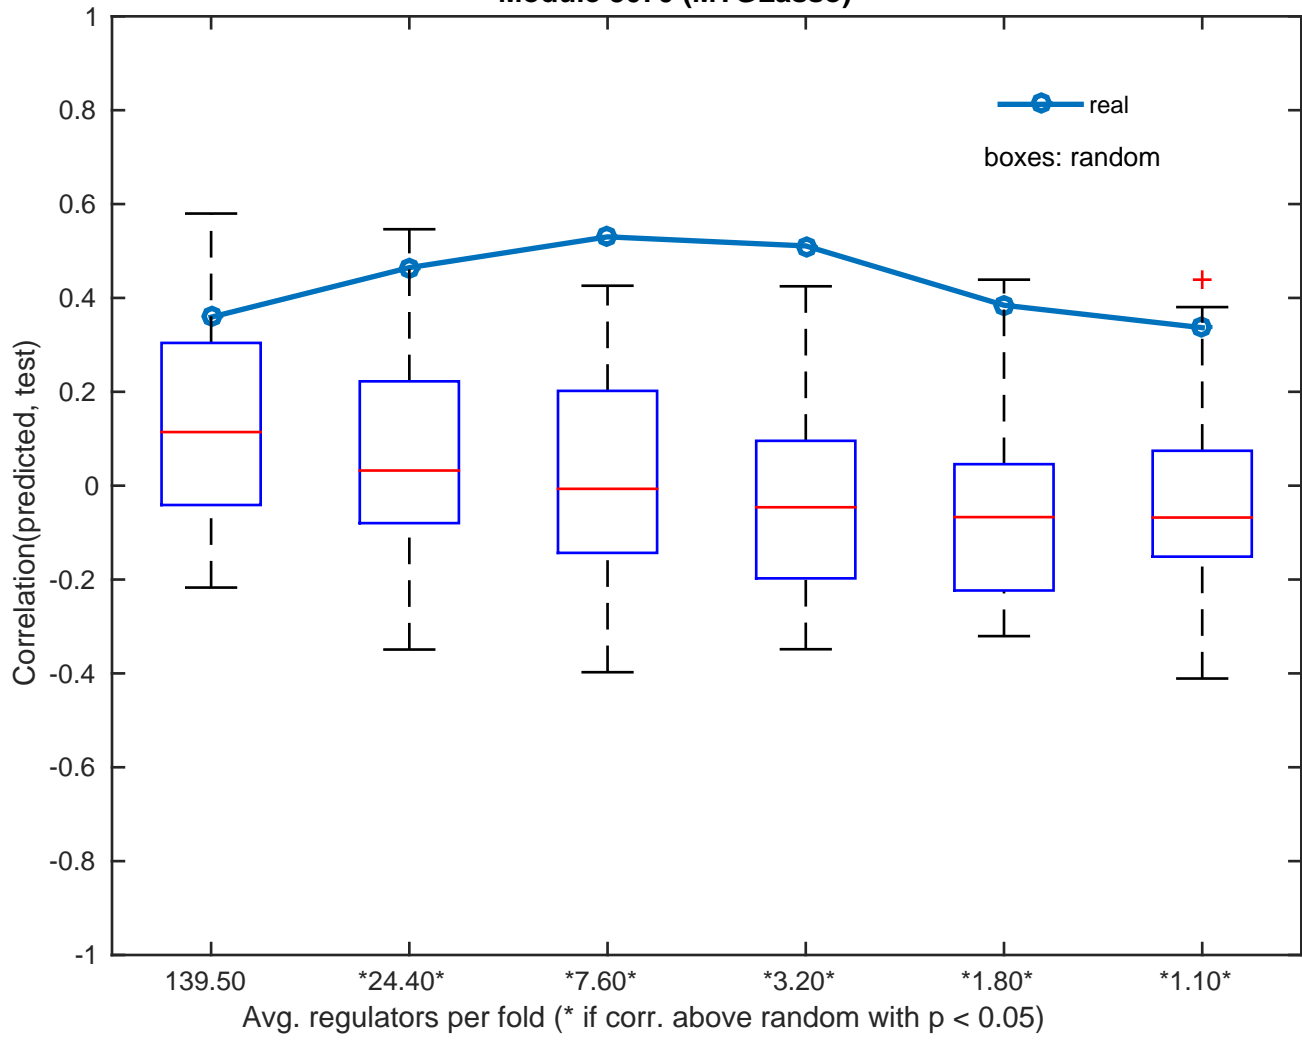

Supplement: S24 (10.1371/journal.pcbi.1005013.s024) [file journal.pcbi.1005013.s024]

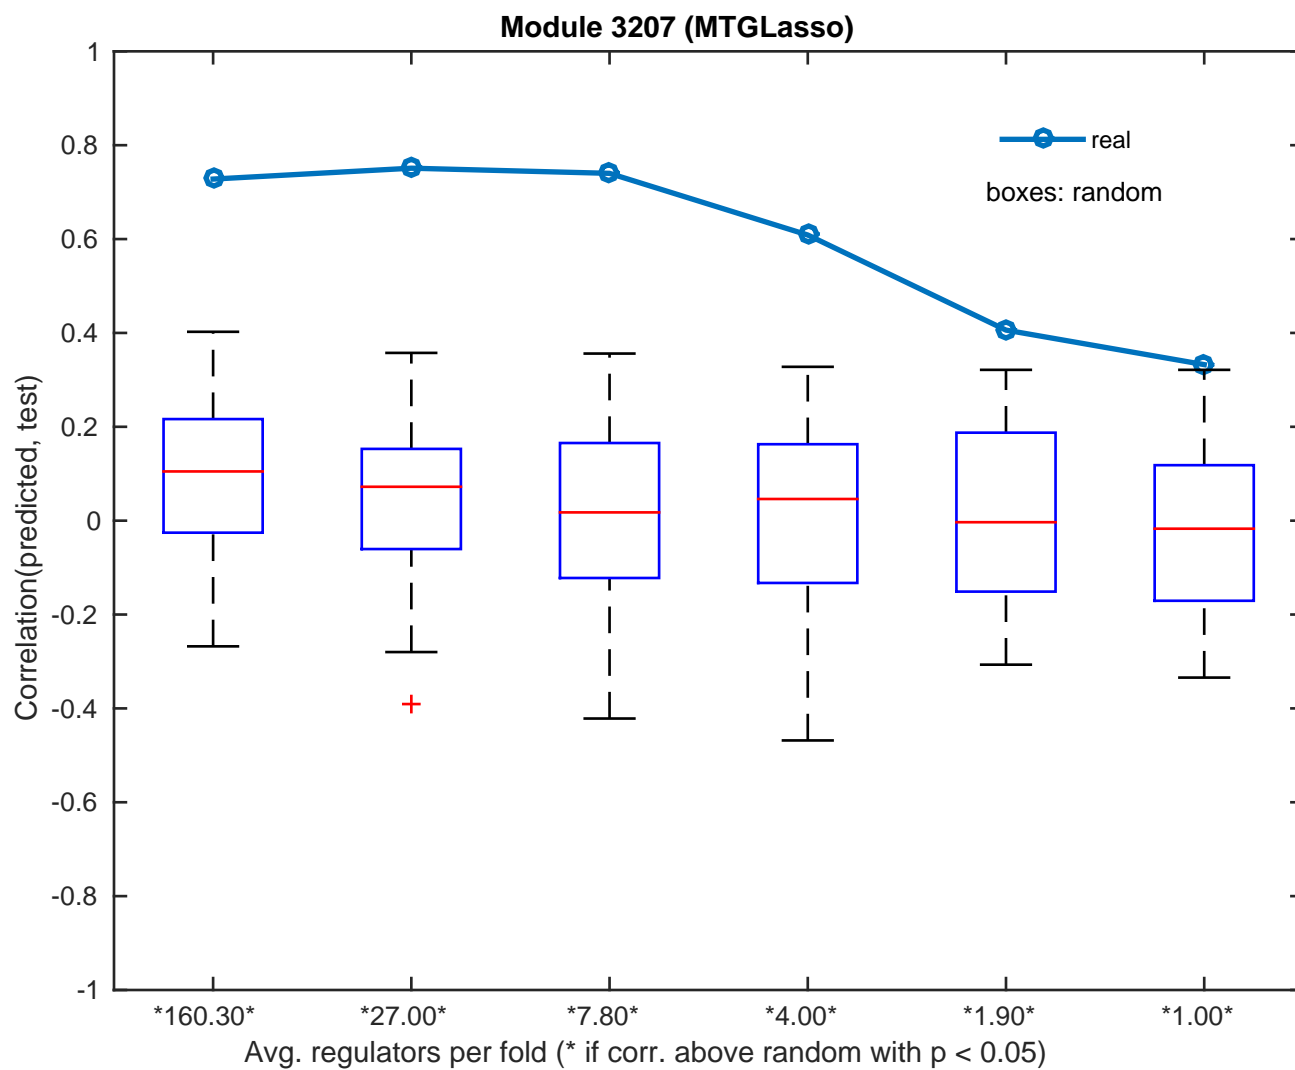

Supplement: S24 (10.1371/journal.pcbi.1005013.s024) [file journal.pcbi.1005013.s024]

Module 3057 (MTGLasso)

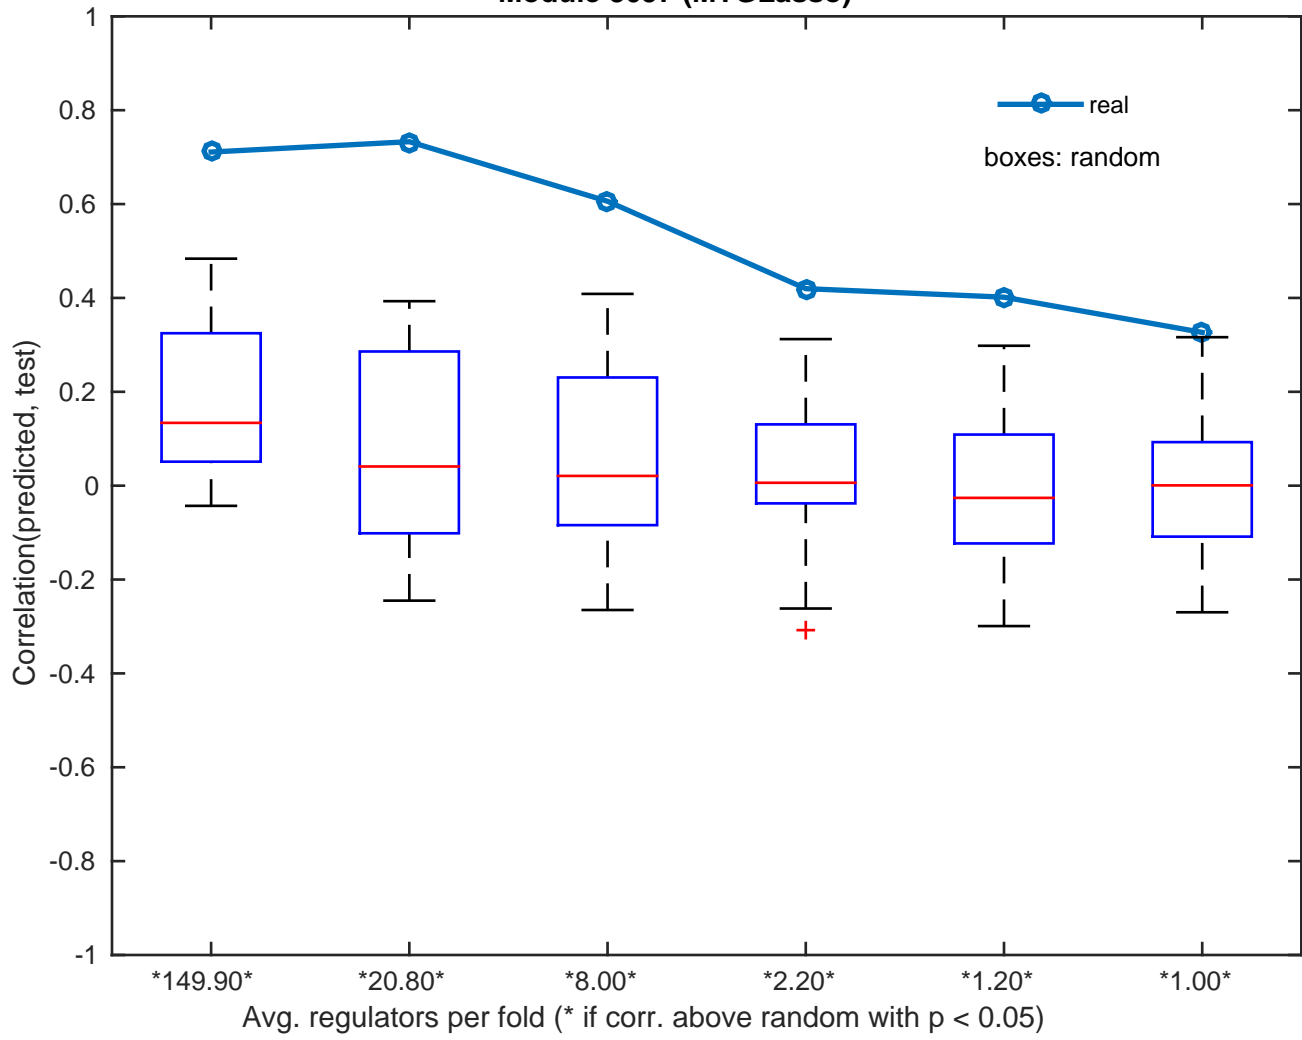

Supplement: S24 (10.1371/journal.pcbi.1005013.s024) [file journal.pcbi.1005013.s024]

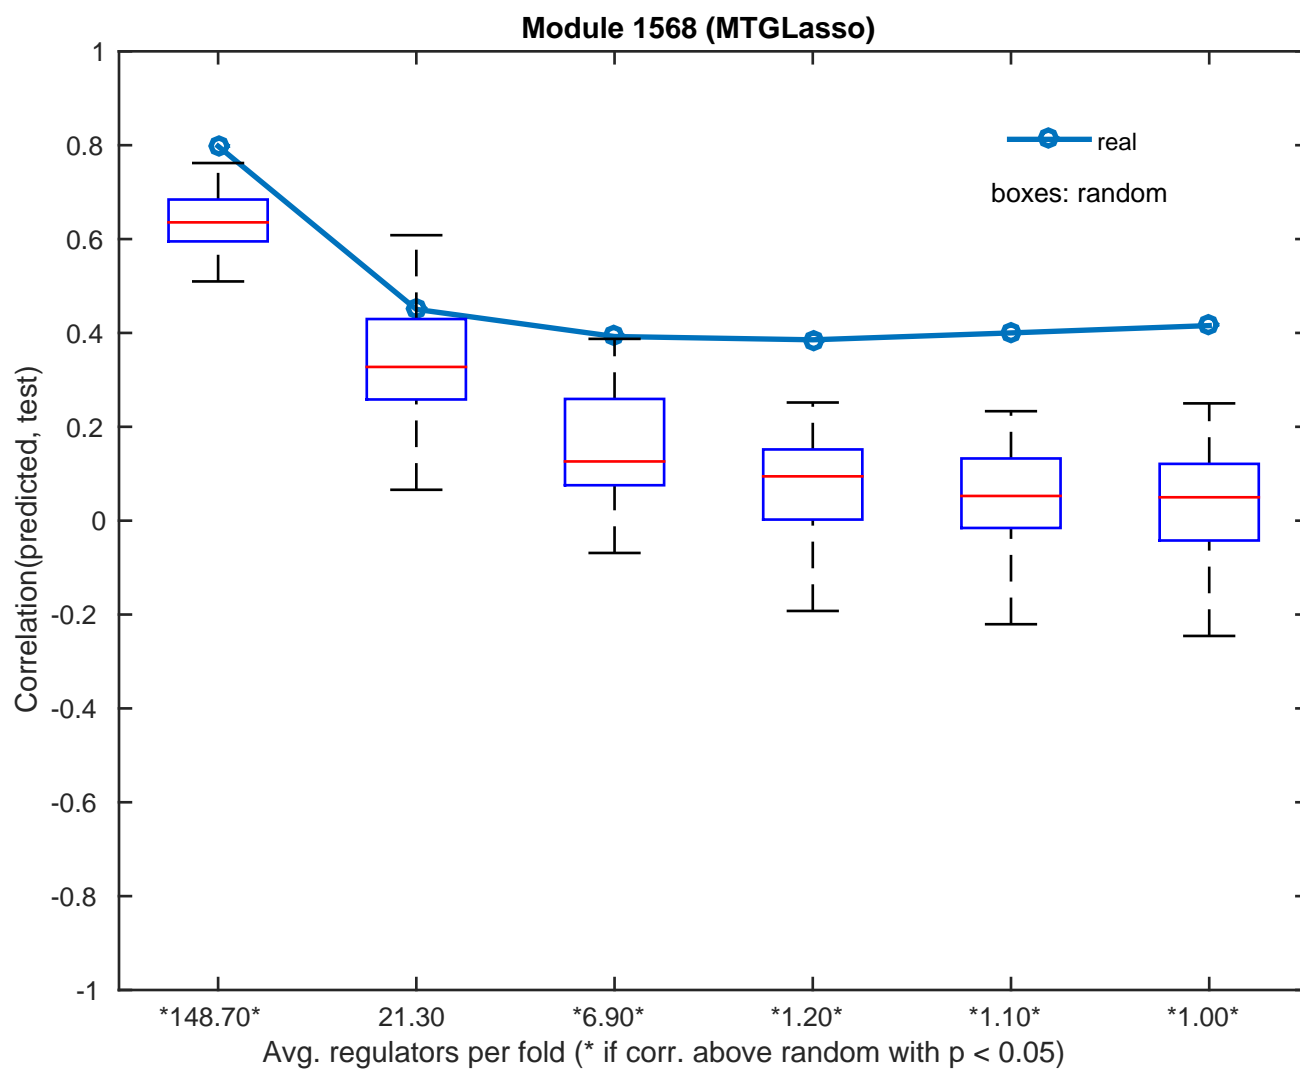

Supplement: S24 (10.1371/journal.pcbi.1005013.s024) [file journal.pcbi.1005013.s024]

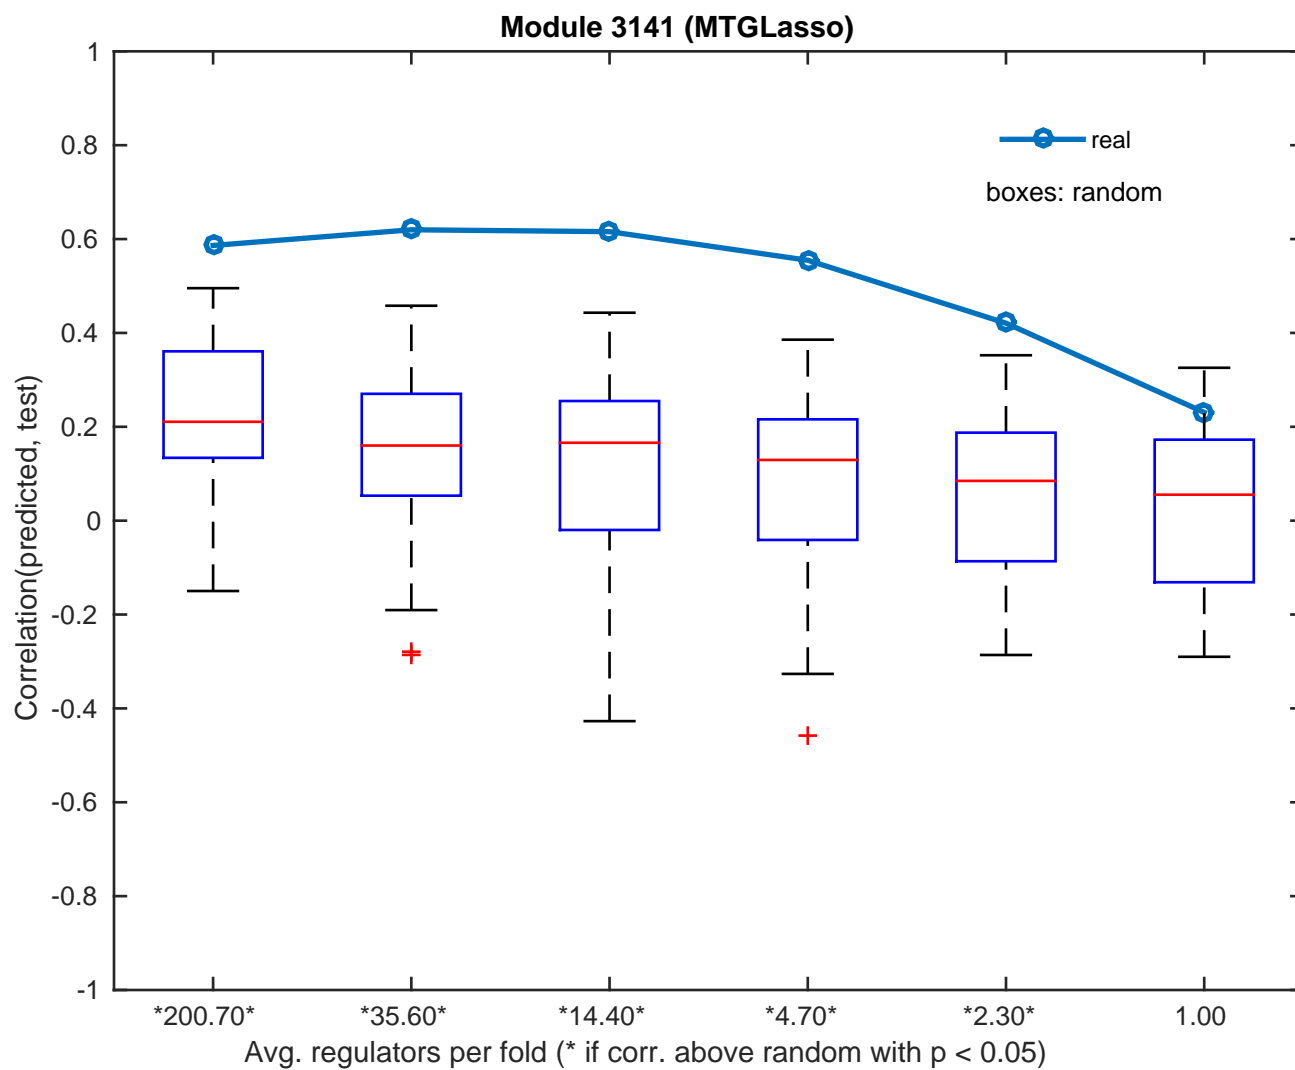

Supplement: S24 (10.1371/journal.pcbi.1005013.s024) [file journal.pcbi.1005013.s024]

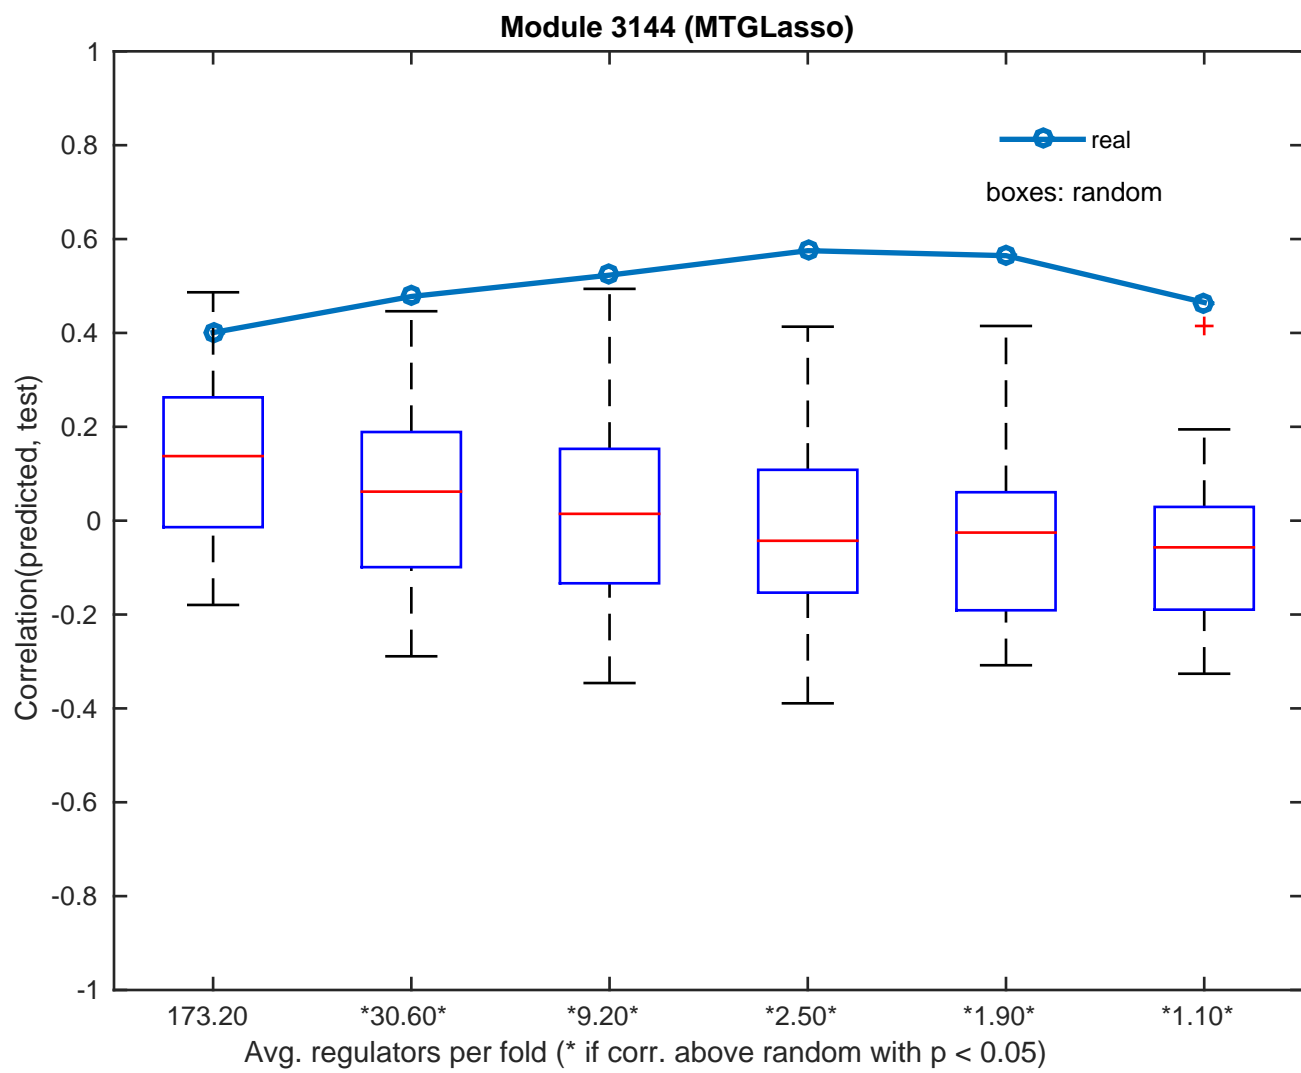

Supplement: S24 (10.1371/journal.pcbi.1005013.s024) [file journal.pcbi.1005013.s024]

Module 1578 (MTGLasso)

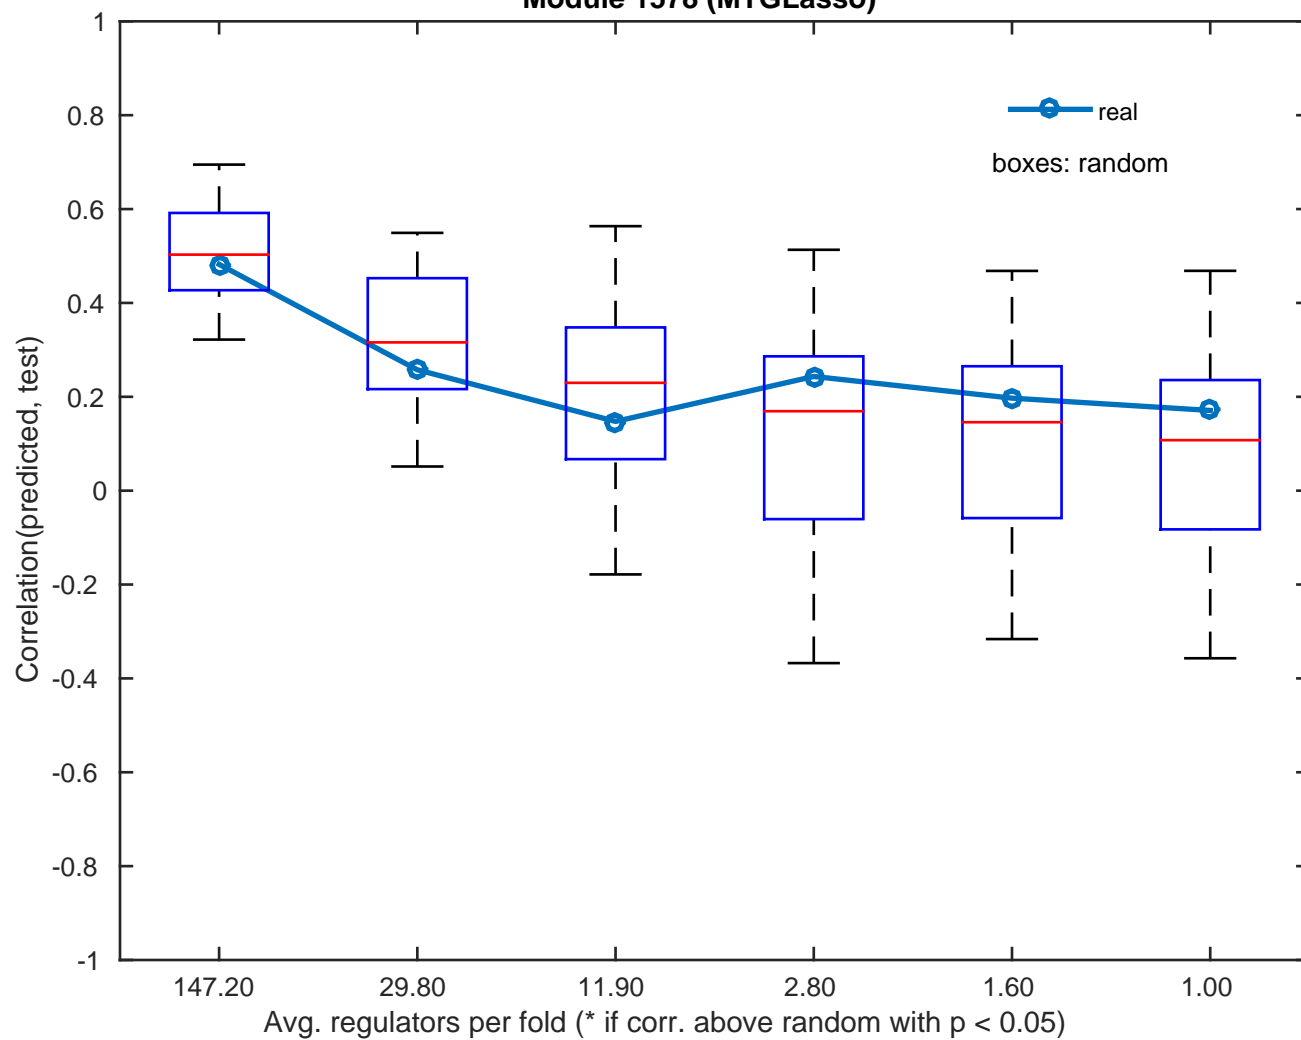

Supplement: S24 (10.1371/journal.pcbi.1005013.s024) [file journal.pcbi.1005013.s024]

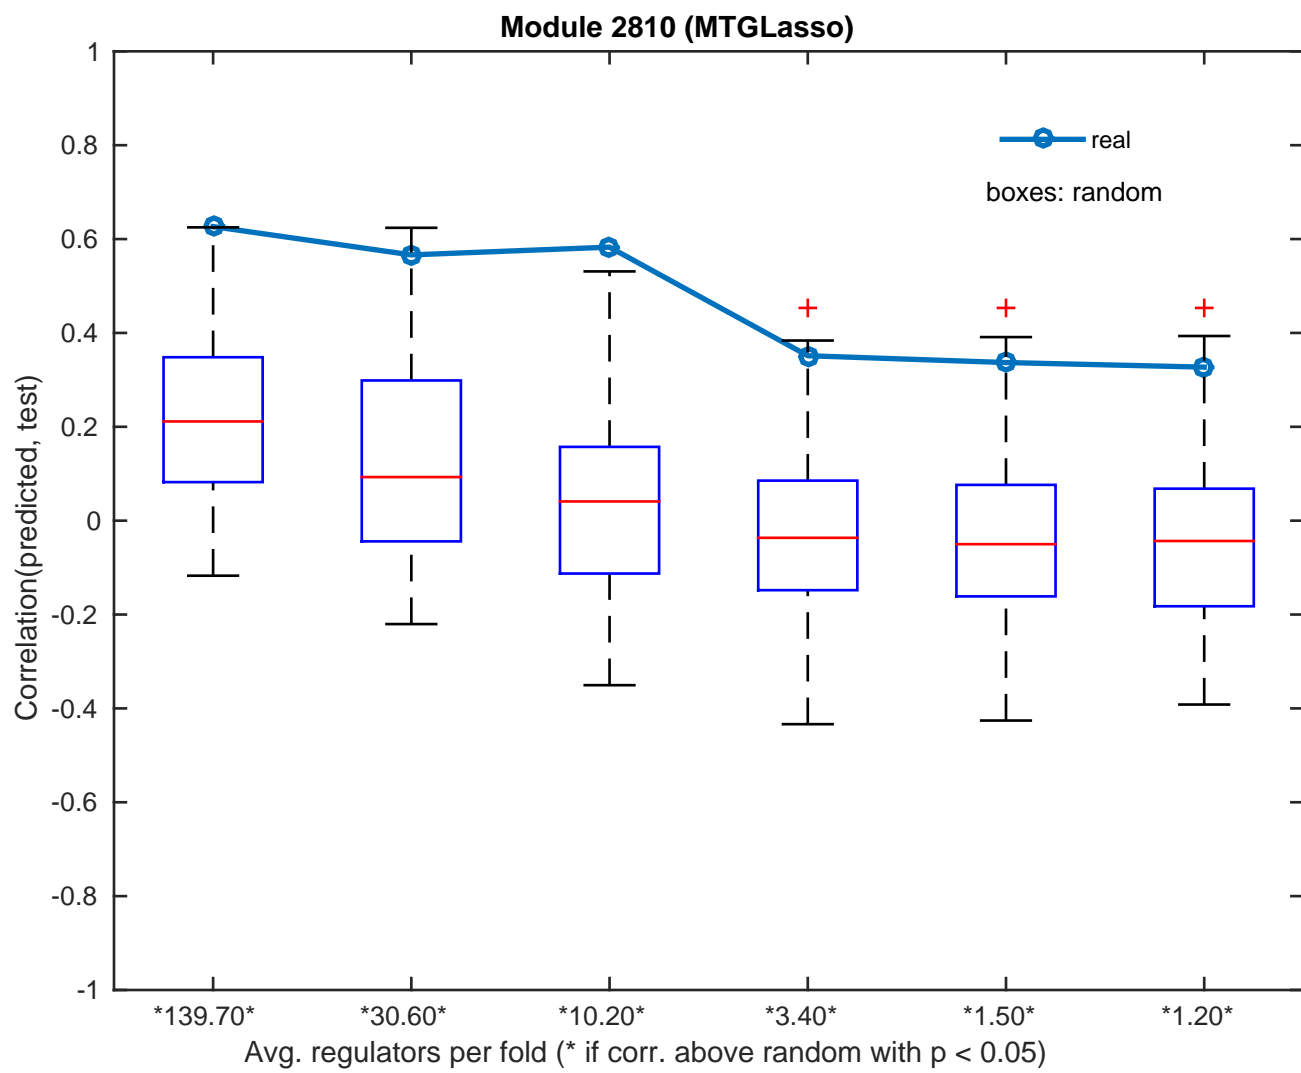

Supplement: S24 (10.1371/journal.pcbi.1005013.s024) [file journal.pcbi.1005013.s024]

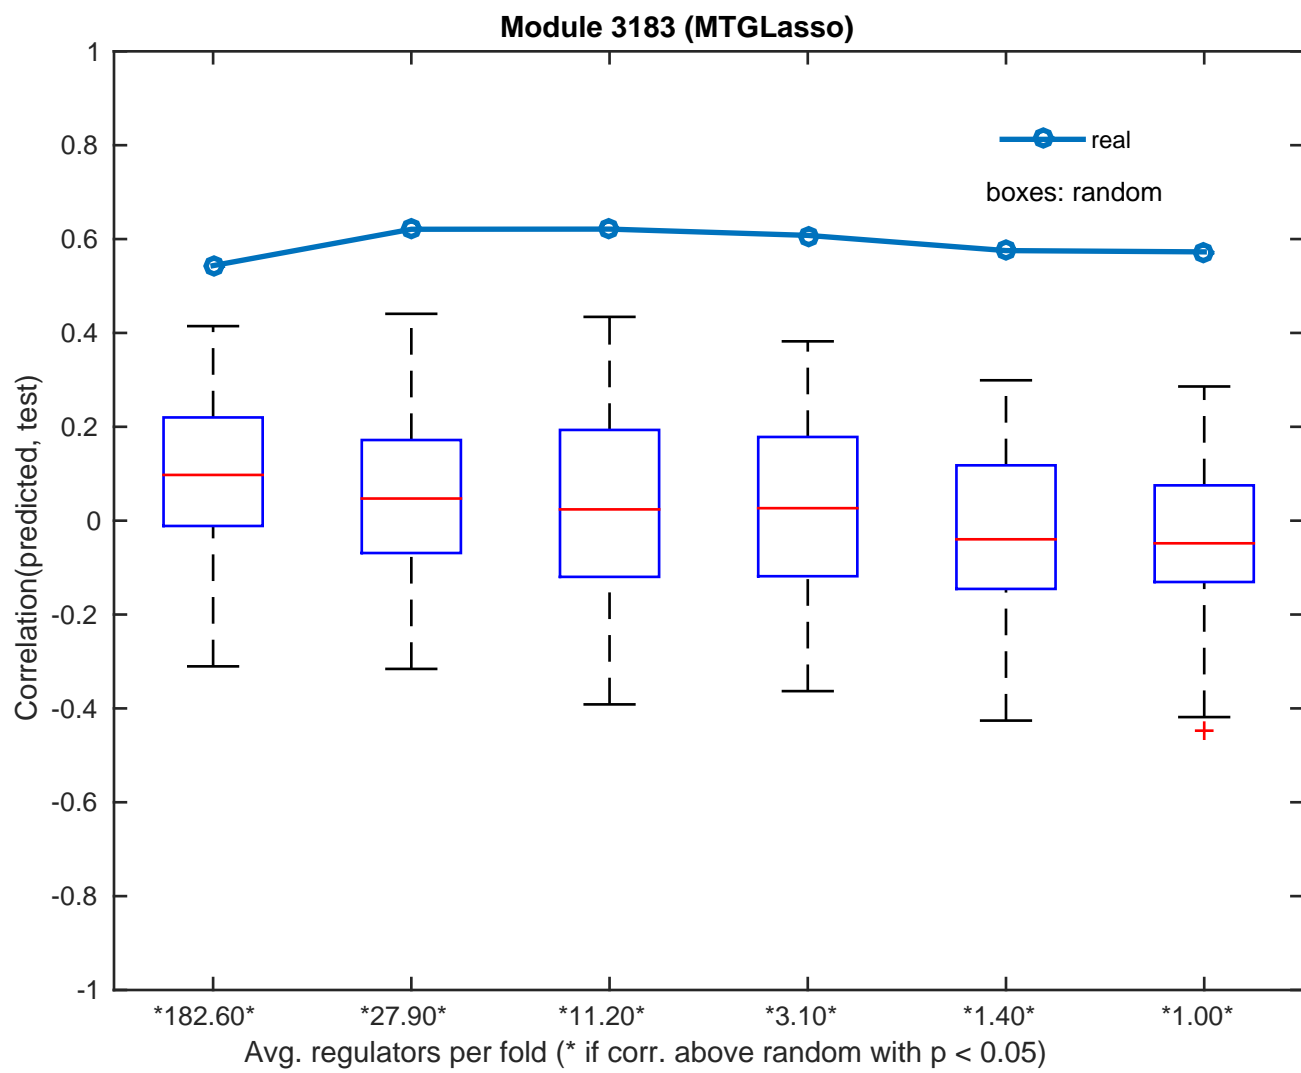

Supplement: S24 (10.1371/journal.pcbi.1005013.s024) [file journal.pcbi.1005013.s024]

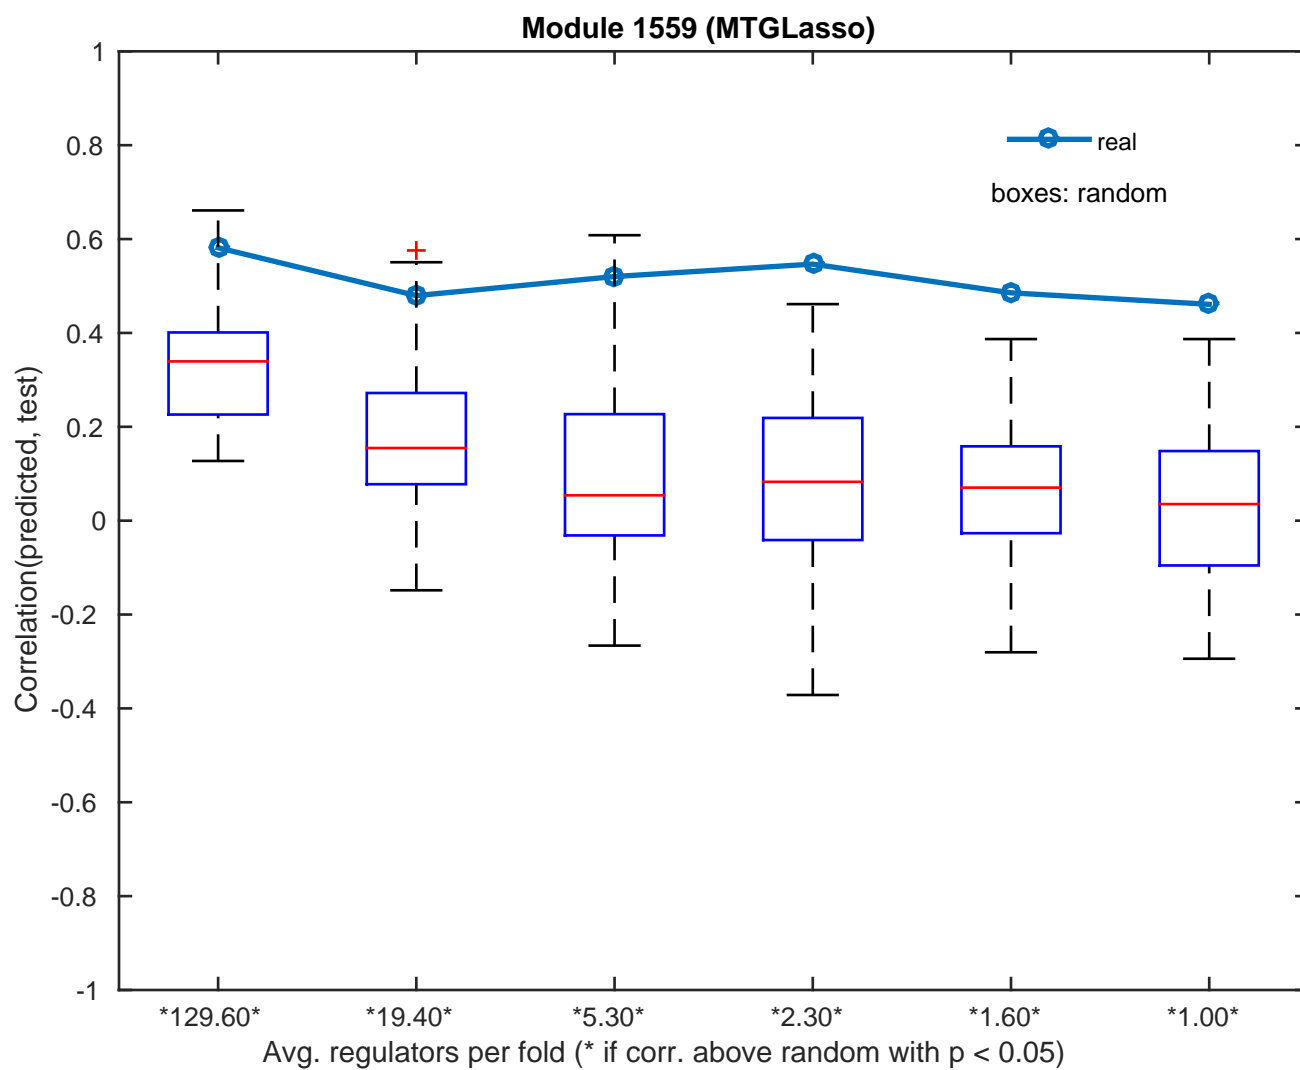

Supplement: S24 (10.1371/journal.pcbi.1005013.s024) [file journal.pcbi.1005013.s024]

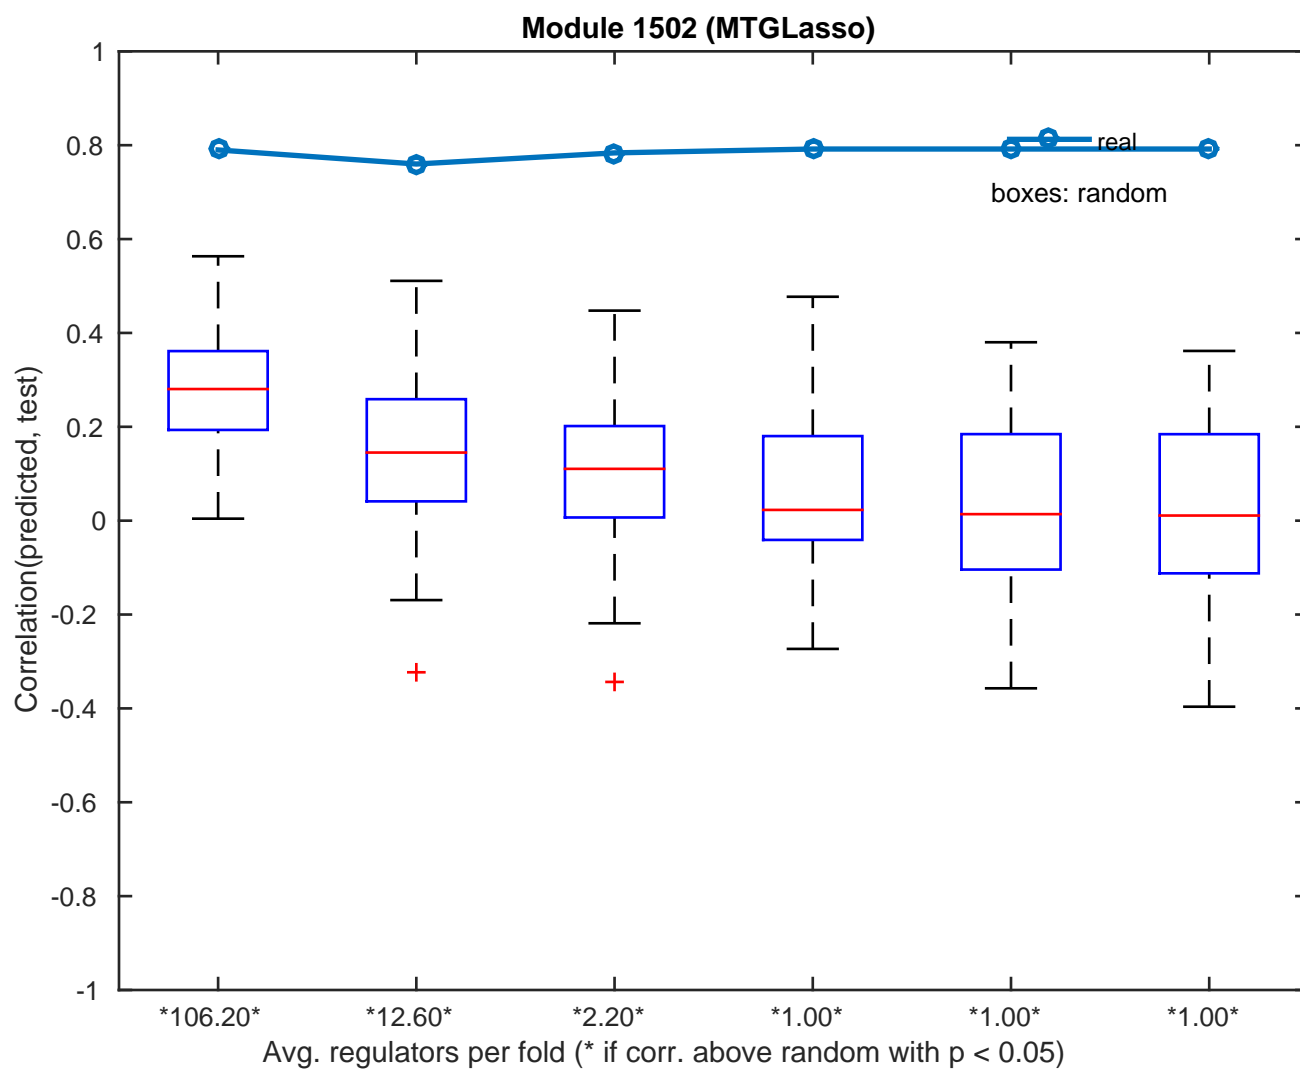

Supplement: S24 (10.1371/journal.pcbi.1005013.s024) [file journal.pcbi.1005013.s024]

Module 1566 (MTGLasso)

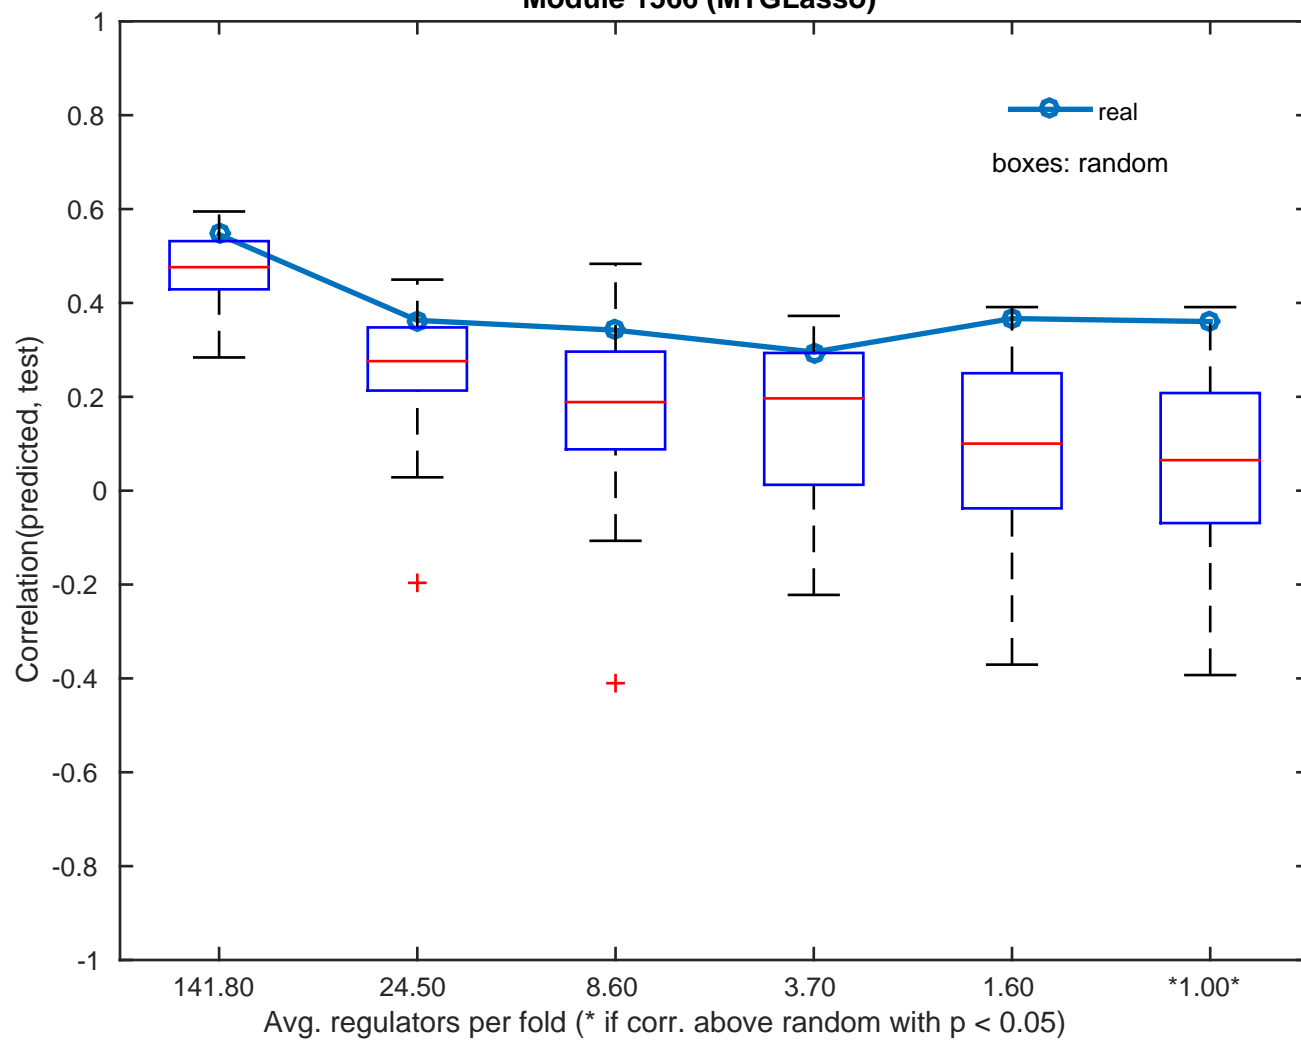

Supplement: S24 (10.1371/journal.pcbi.1005013.s024) [file journal.pcbi.1005013.s024]

Module 1597 (MTGLasso)

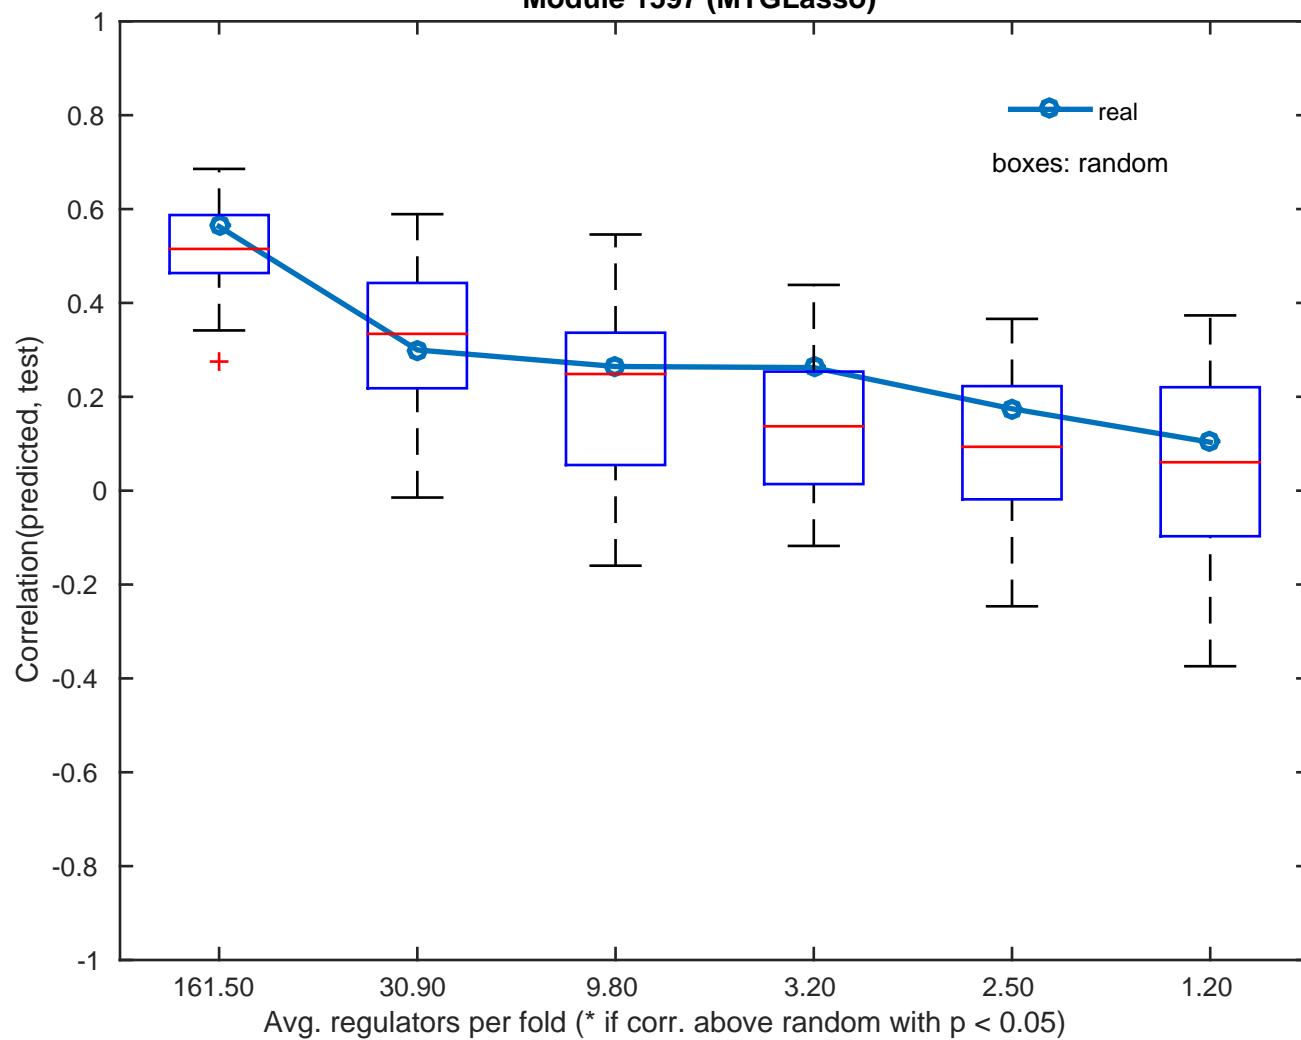

Supplement: S24 (10.1371/journal.pcbi.1005013.s024) [file journal.pcbi.1005013.s024]

Module 3036 (MTGLasso)

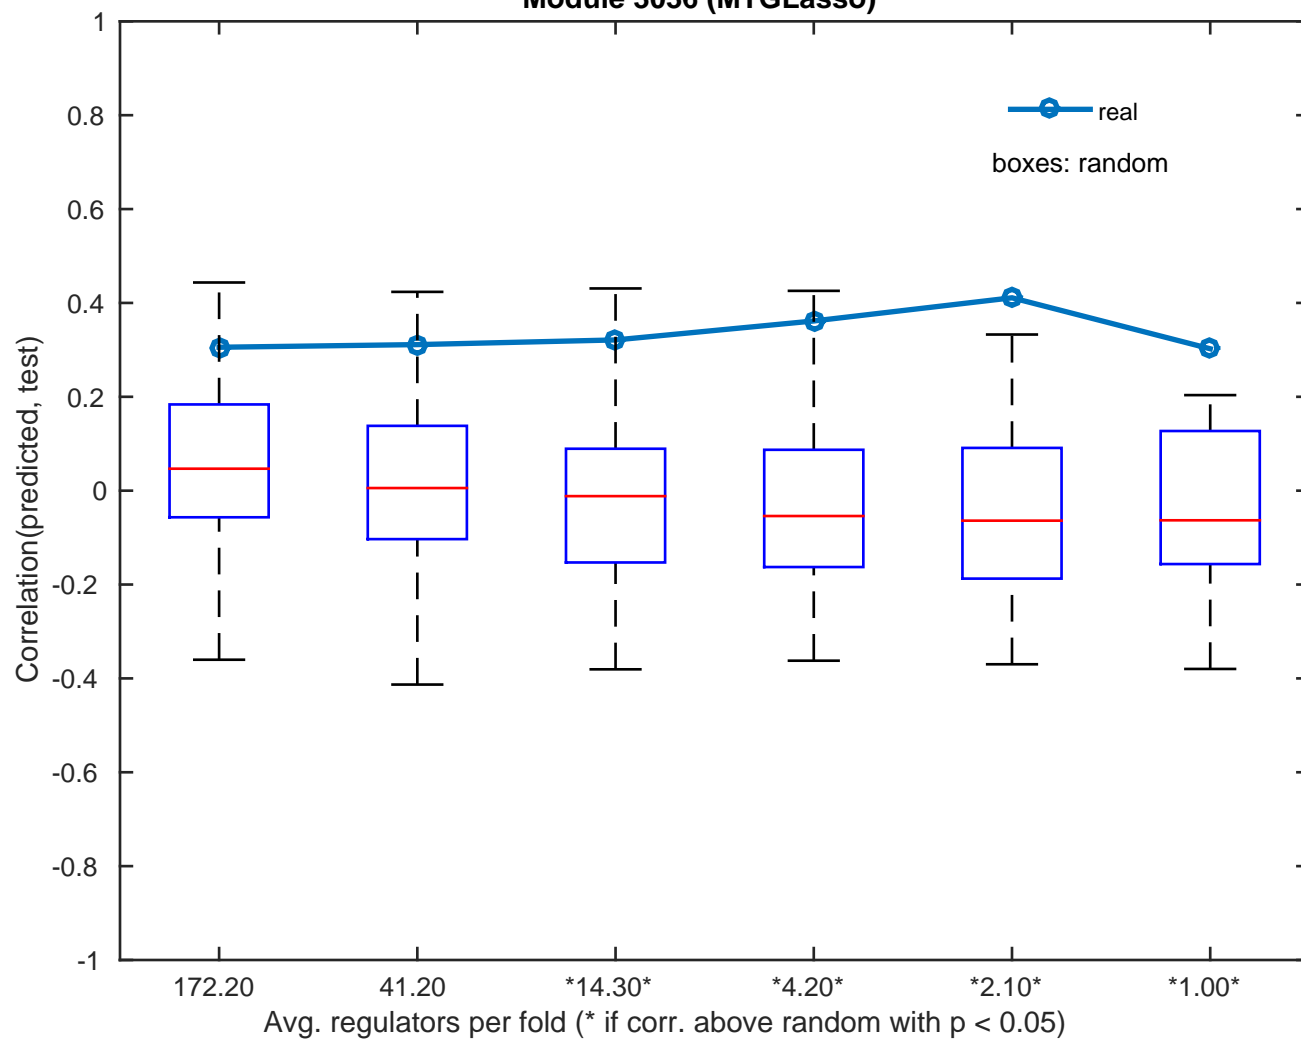

Supplement: S24 (10.1371/journal.pcbi.1005013.s024) [file journal.pcbi.1005013.s024]

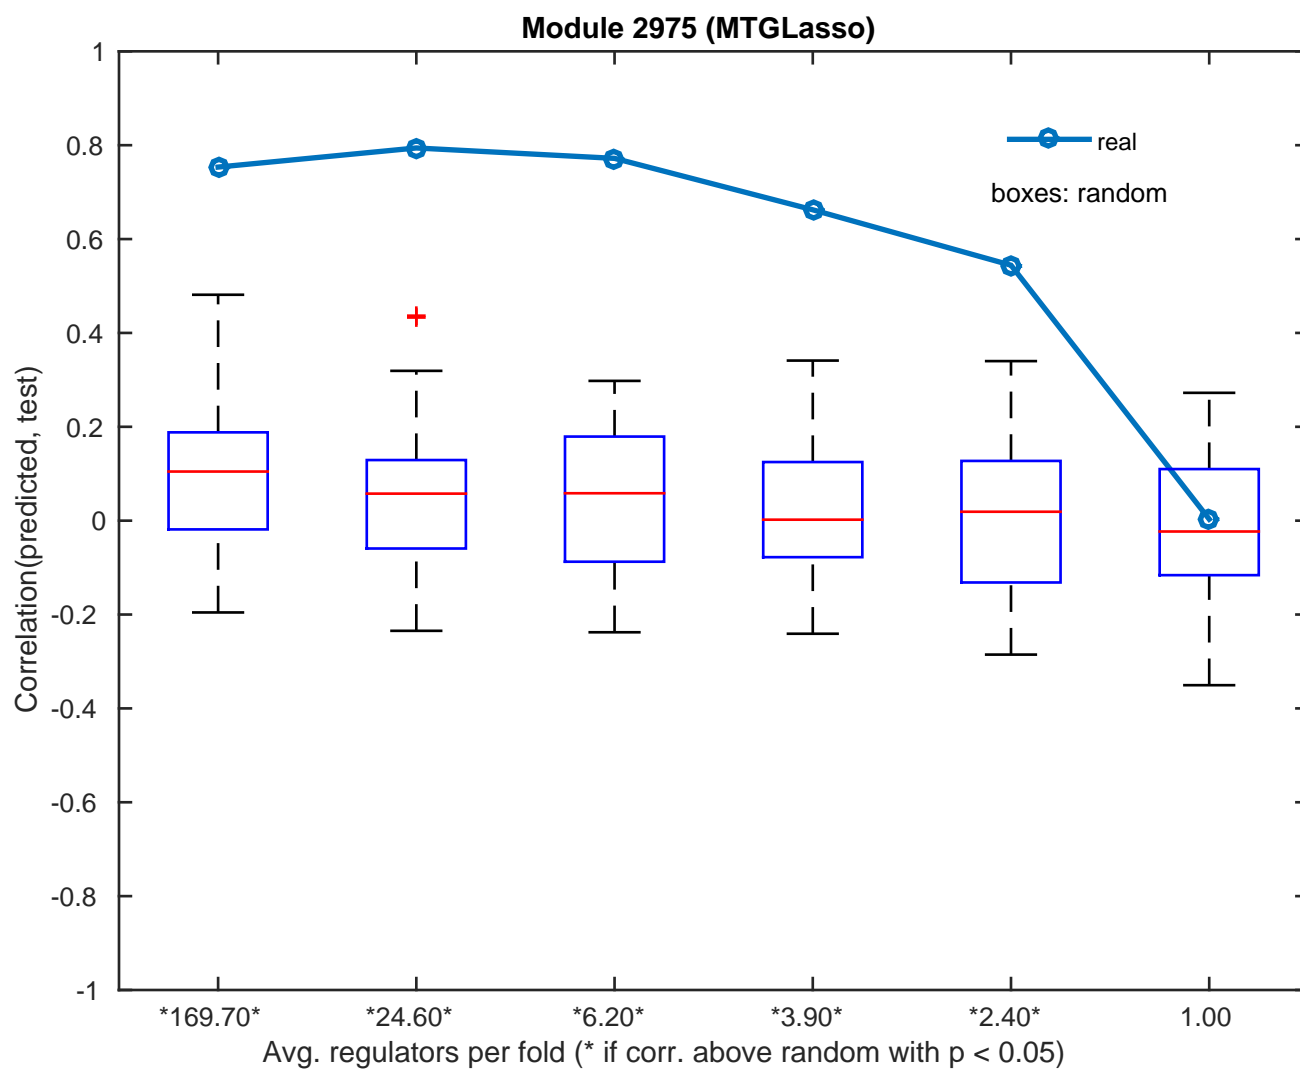

Supplement: S24 (10.1371/journal.pcbi.1005013.s024) [file journal.pcbi.1005013.s024]

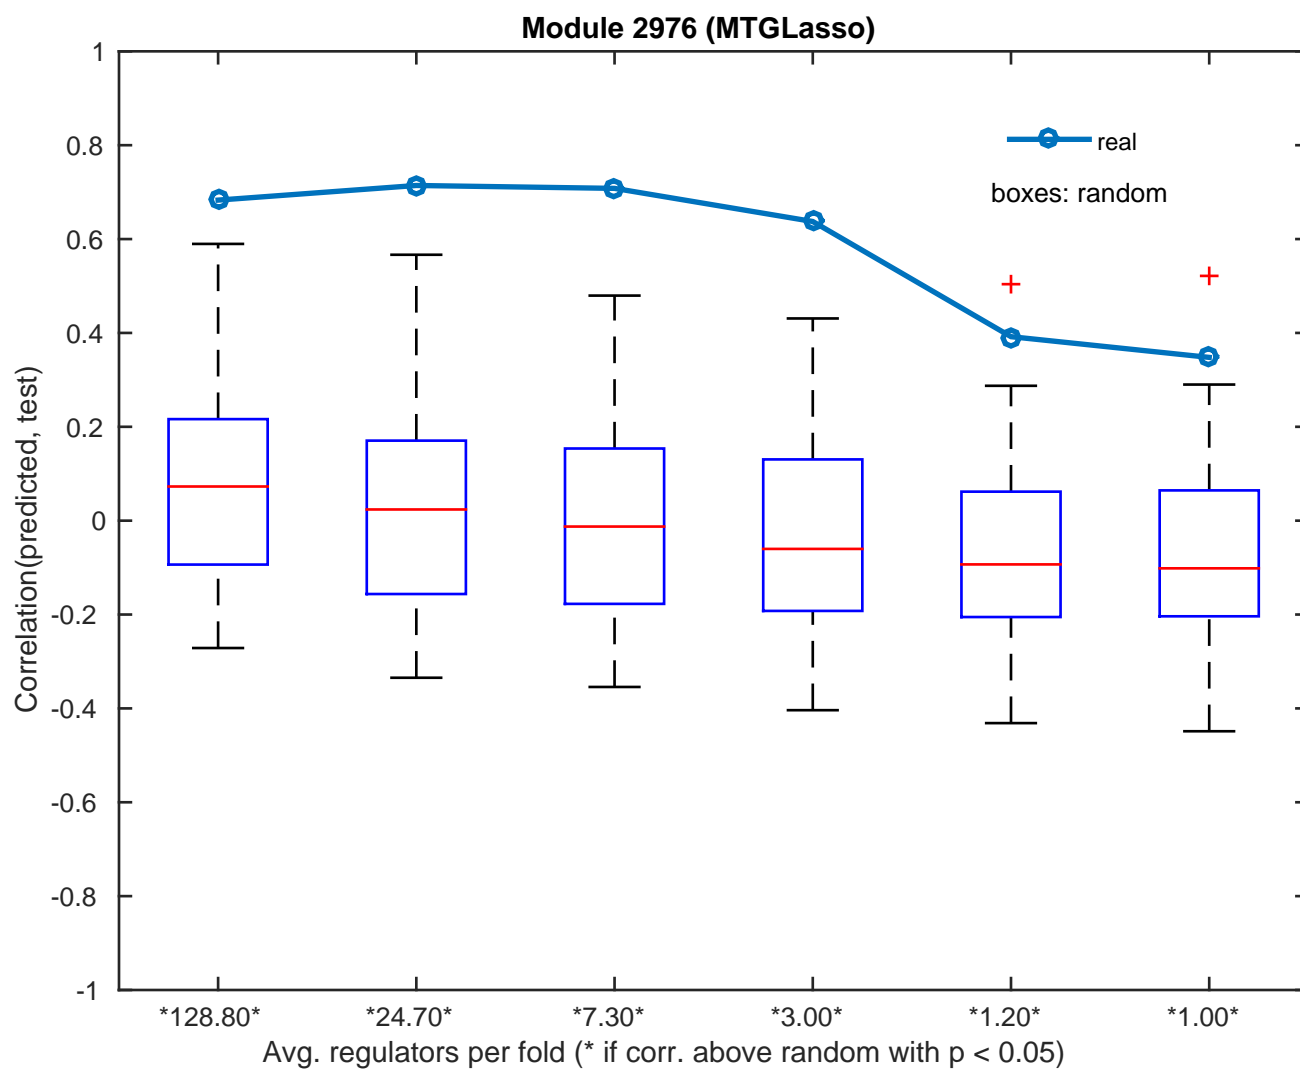

Supplement: S24 (10.1371/journal.pcbi.1005013.s024) [file journal.pcbi.1005013.s024]

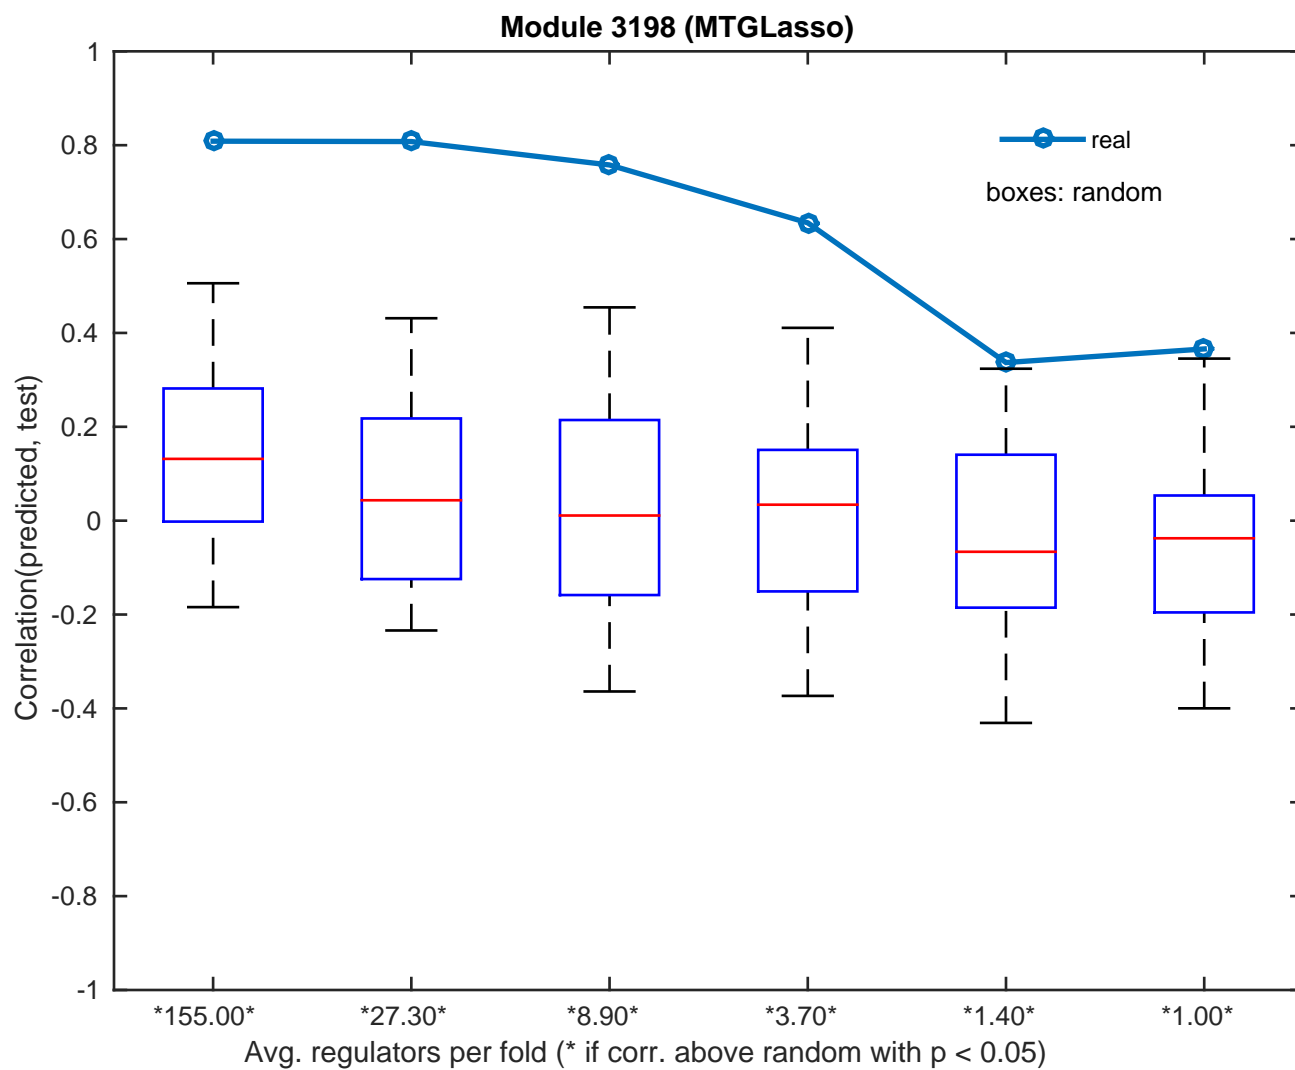

Supplement: S24 (10.1371/journal.pcbi.1005013.s024) [file journal.pcbi.1005013.s024]

Module 3182 (MTGLasso)

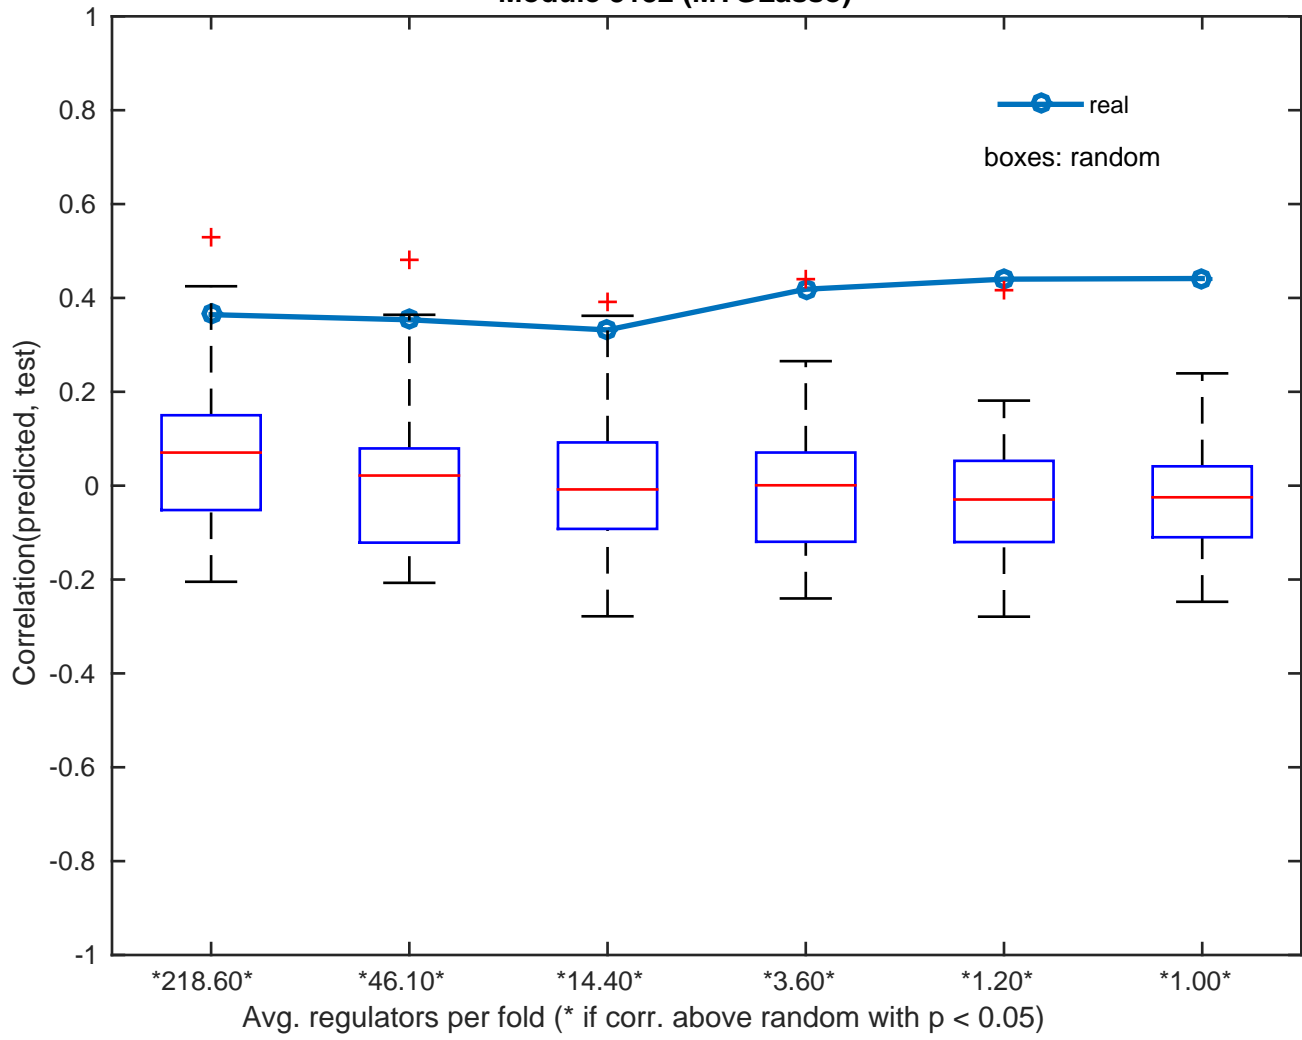

Supplement: S24 (10.1371/journal.pcbi.1005013.s024) [file journal.pcbi.1005013.s024]

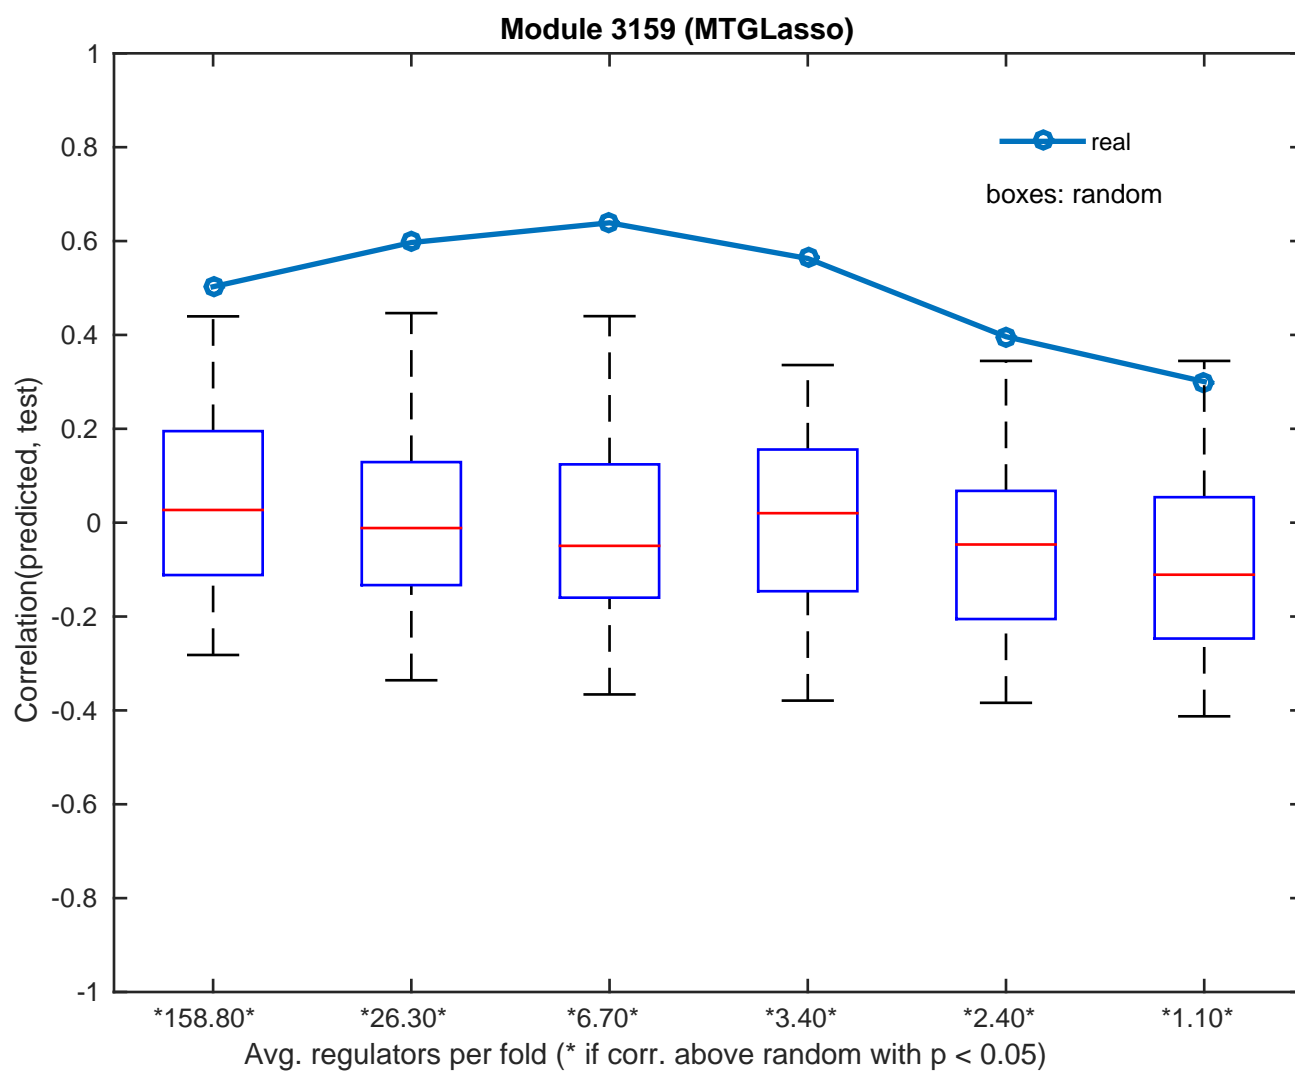

Supplement: S24 (10.1371/journal.pcbi.1005013.s024) [file journal.pcbi.1005013.s024]

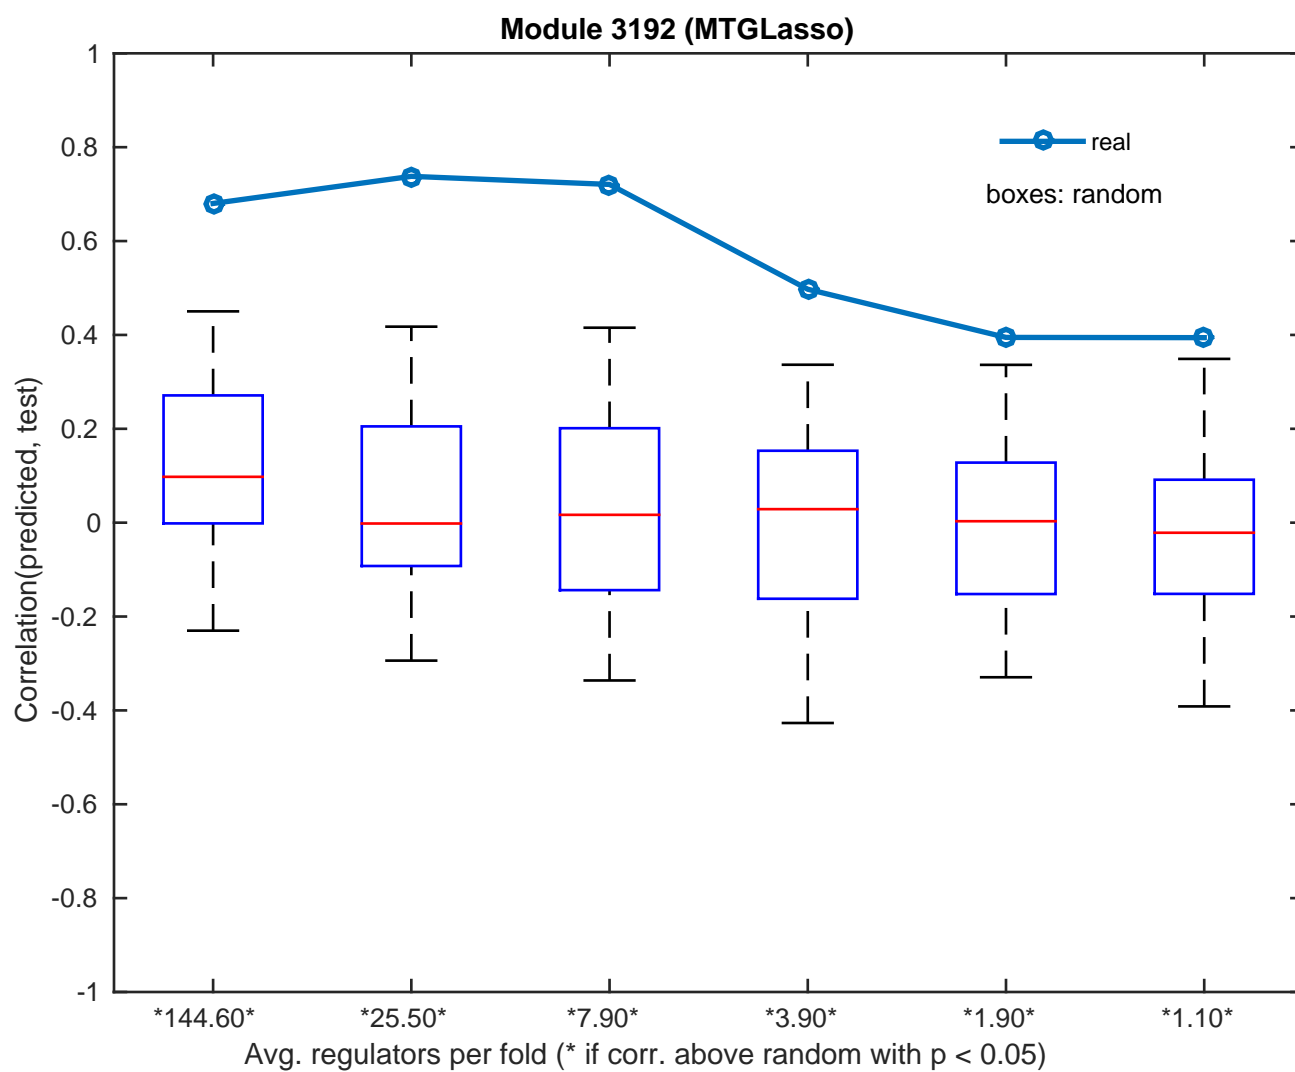

Supplement: S24 (10.1371/journal.pcbi.1005013.s024) [file journal.pcbi.1005013.s024]

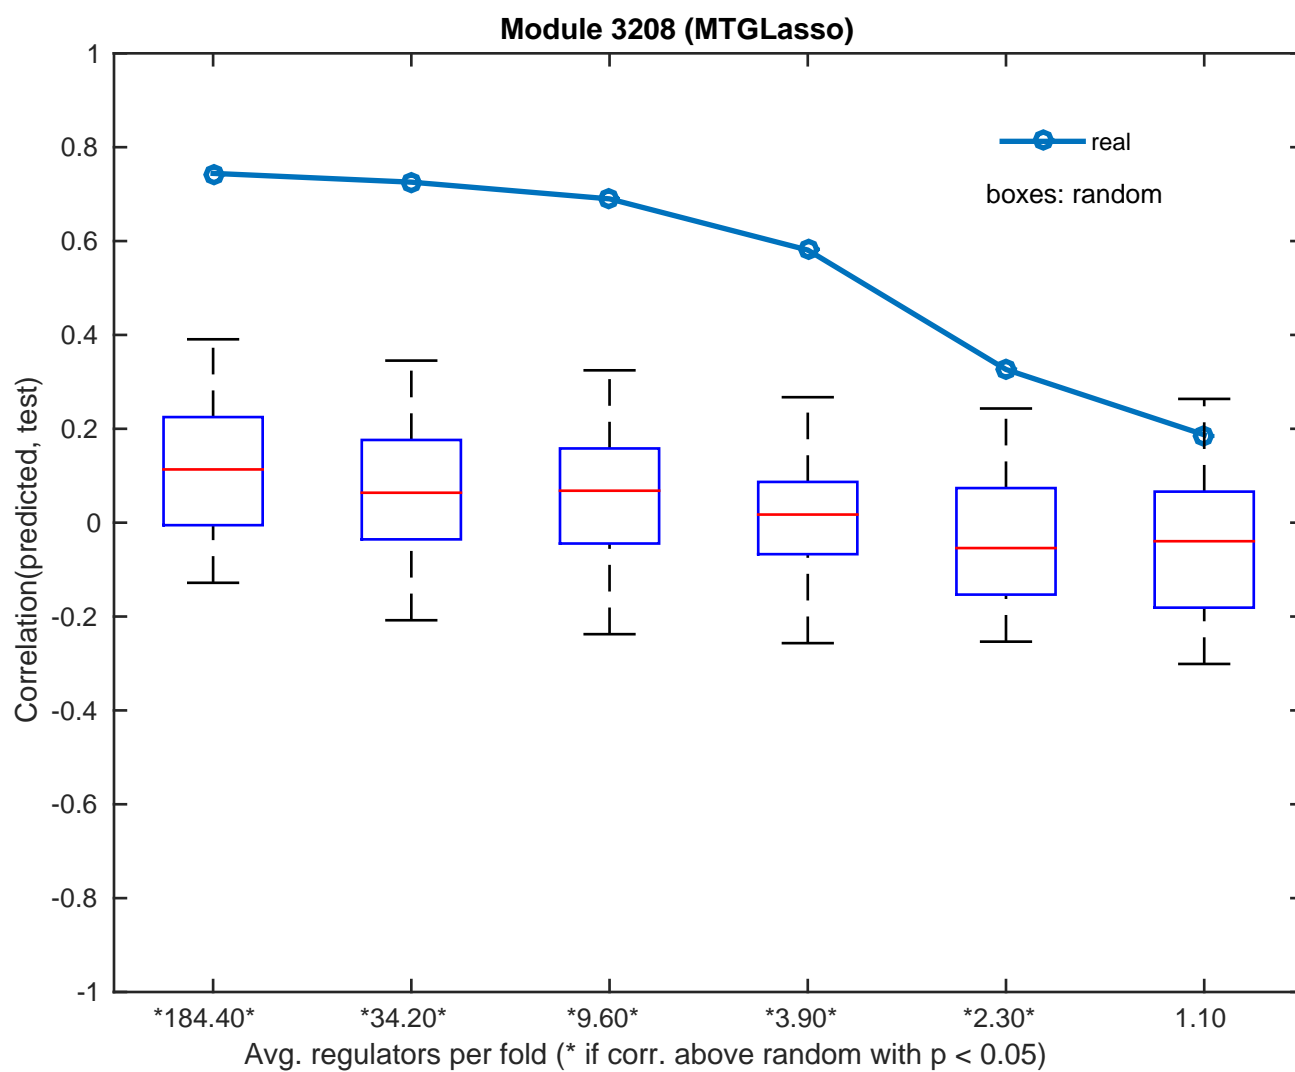

Supplement: S24 (10.1371/journal.pcbi.1005013.s024) [file journal.pcbi.1005013.s024]

Module 1571 (MTGLasso)

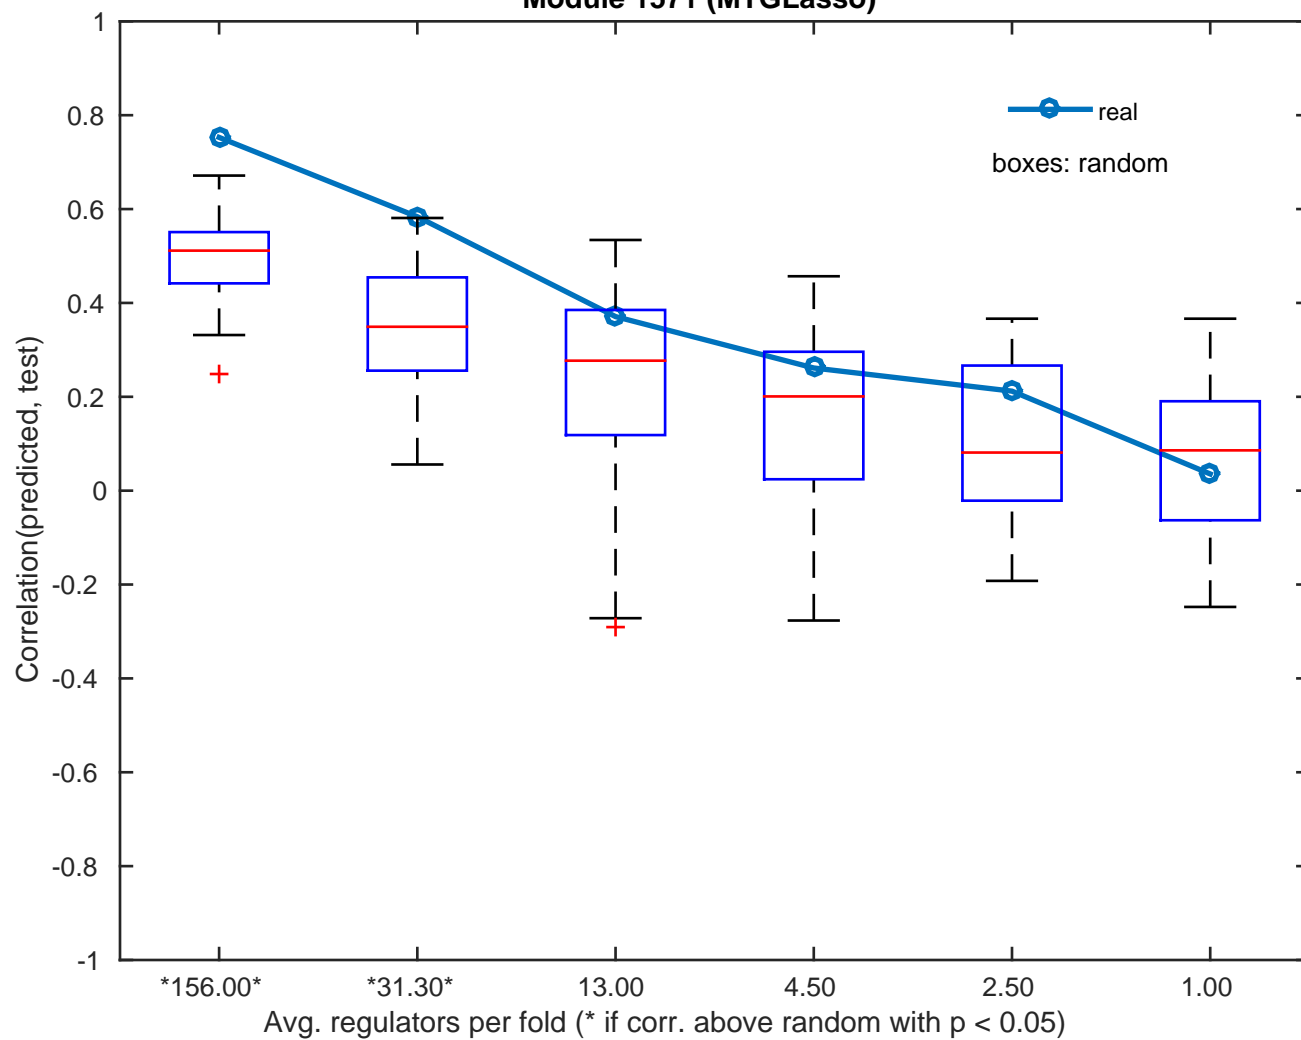

Supplement: S24 (10.1371/journal.pcbi.1005013.s024) [file journal.pcbi.1005013.s024]

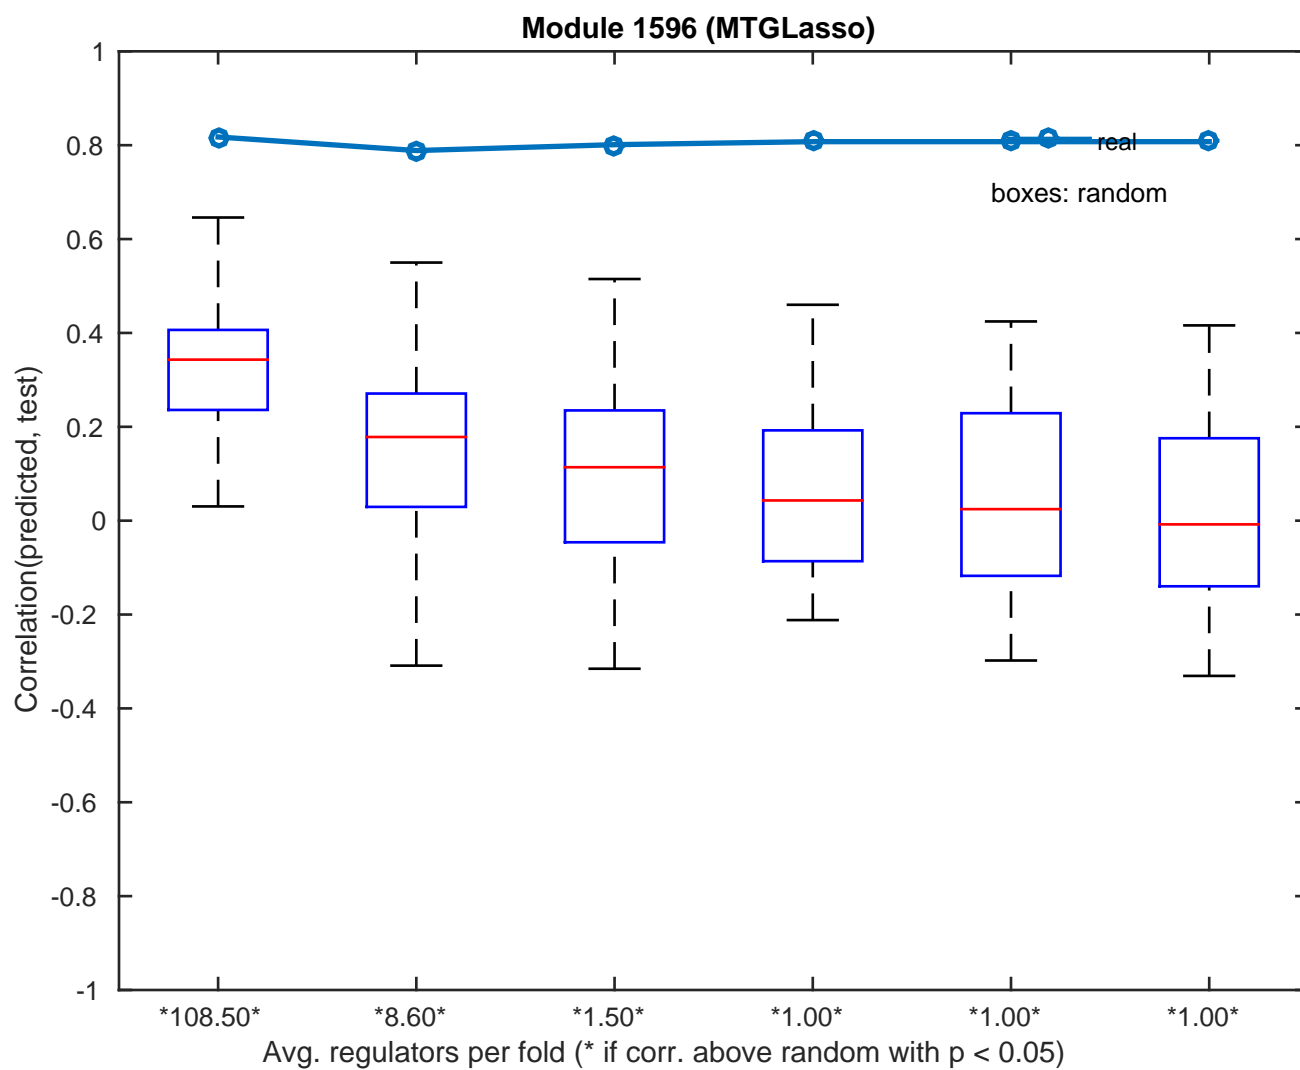

Supplement: S24 (10.1371/journal.pcbi.1005013.s024) [file journal.pcbi.1005013.s024]

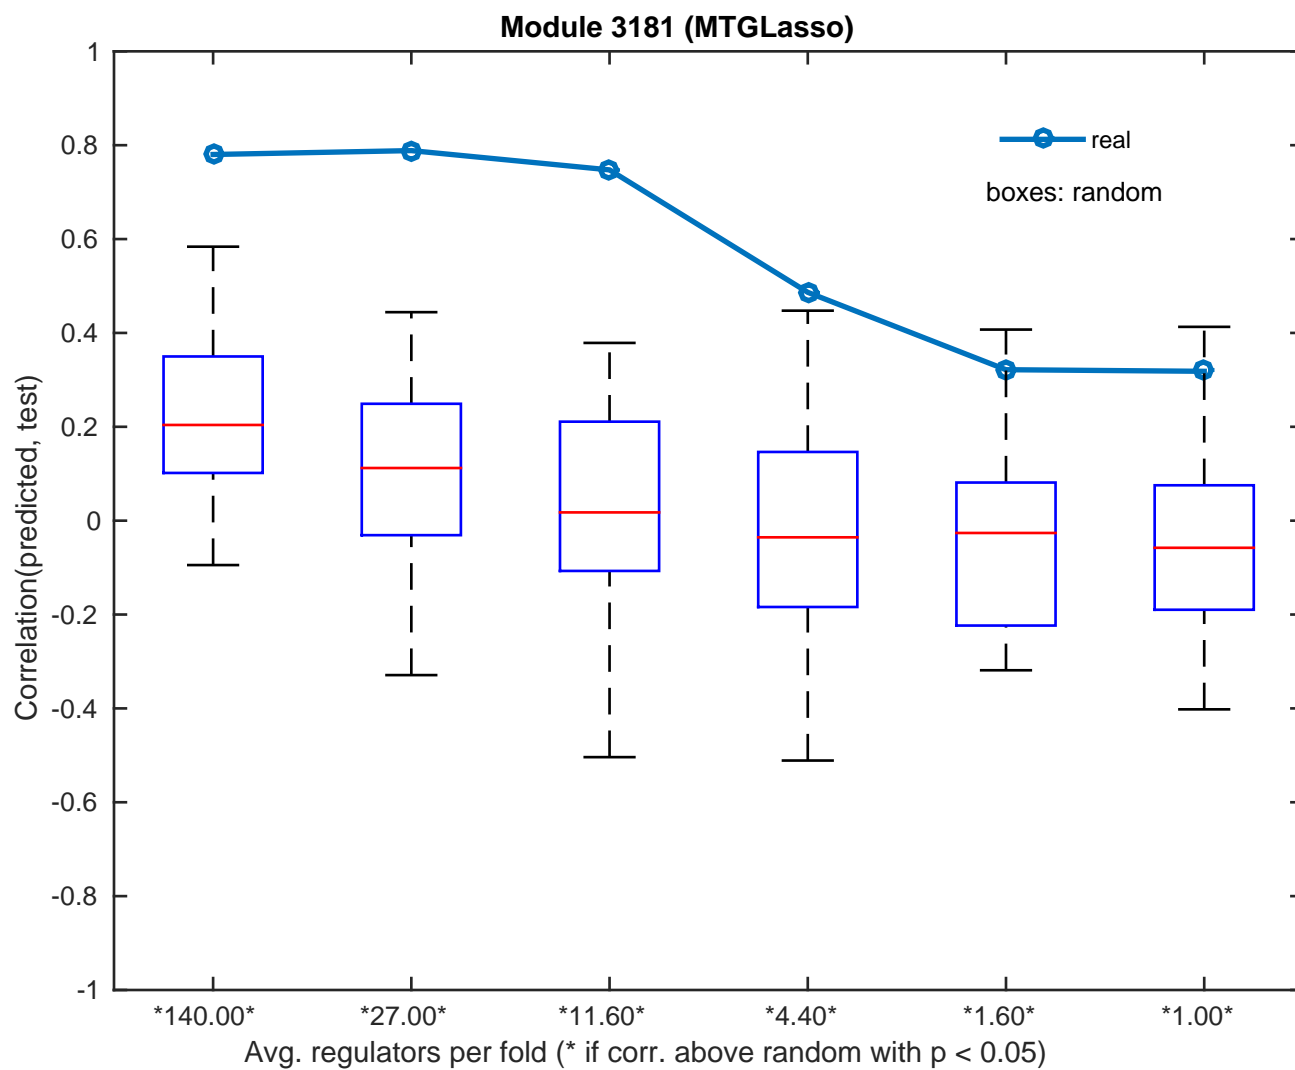

Supplement: S24 (10.1371/journal.pcbi.1005013.s024) [file journal.pcbi.1005013.s024]

Module 3003 (MTGLasso)

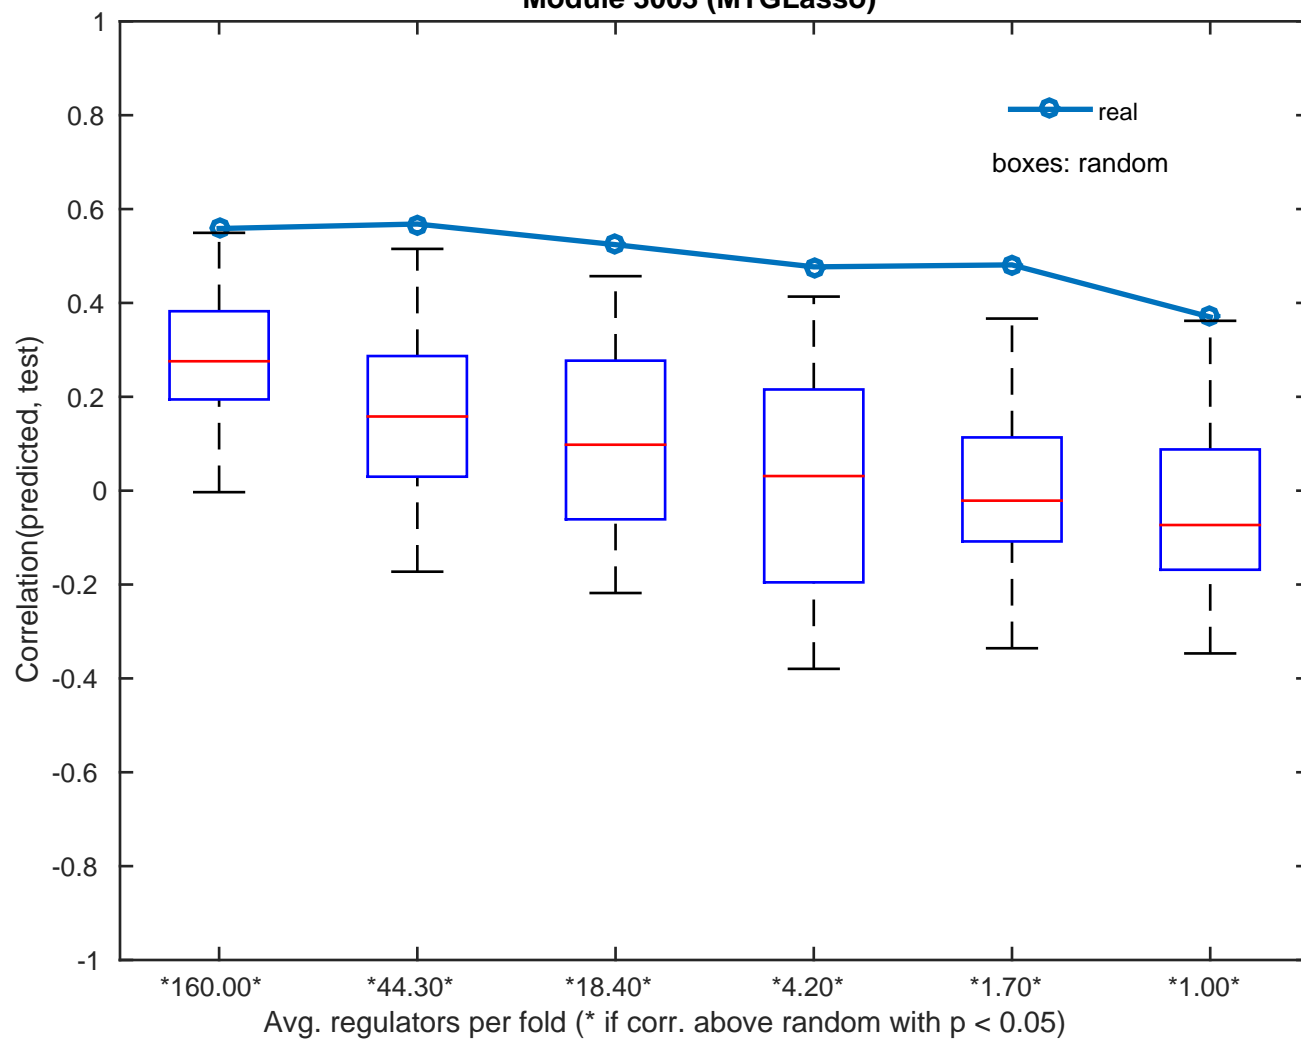

Supplement: S24 (10.1371/journal.pcbi.1005013.s024) [file journal.pcbi.1005013.s024]

Module 3156 (MTGLasso)

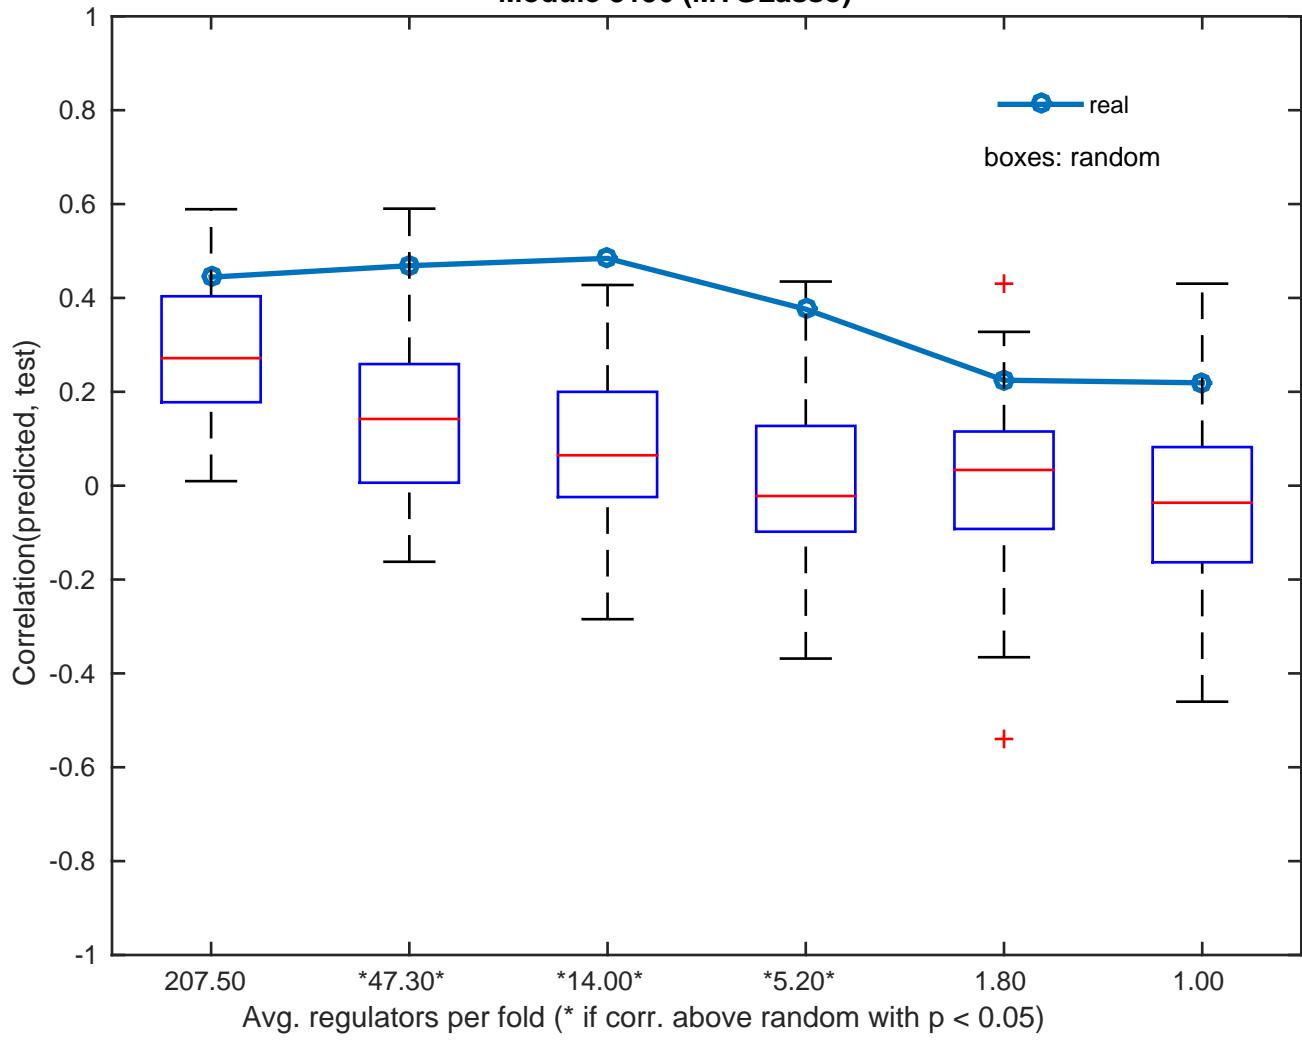

Supplement: S24 (10.1371/journal.pcbi.1005013.s024) [file journal.pcbi.1005013.s024]

Module 1469 (MTGLasso)

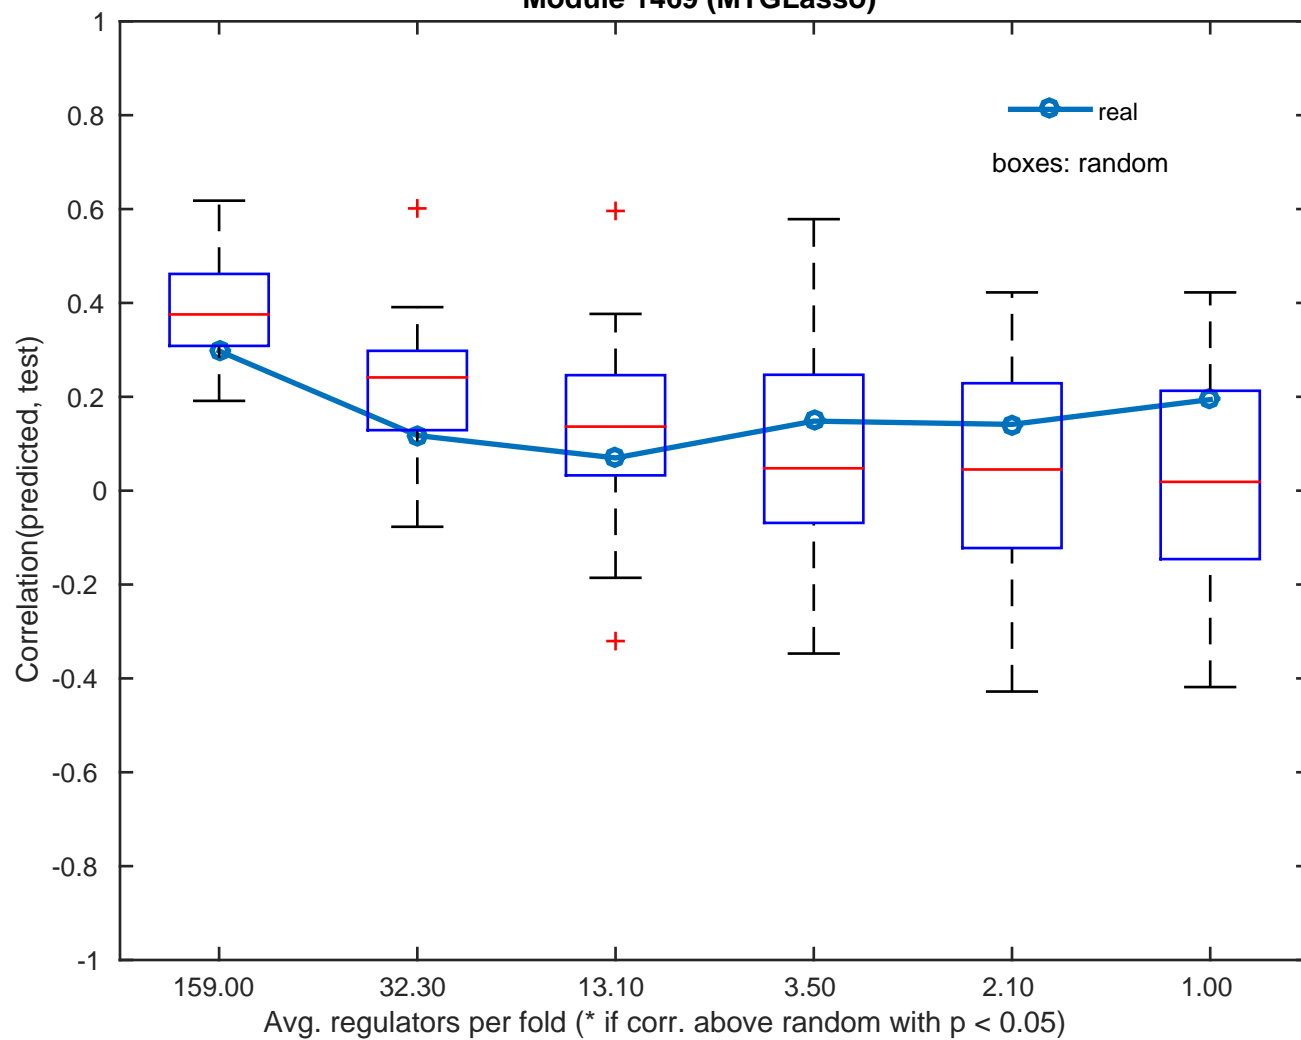

Supplement: S24 (10.1371/journal.pcbi.1005013.s024) [file journal.pcbi.1005013.s024]

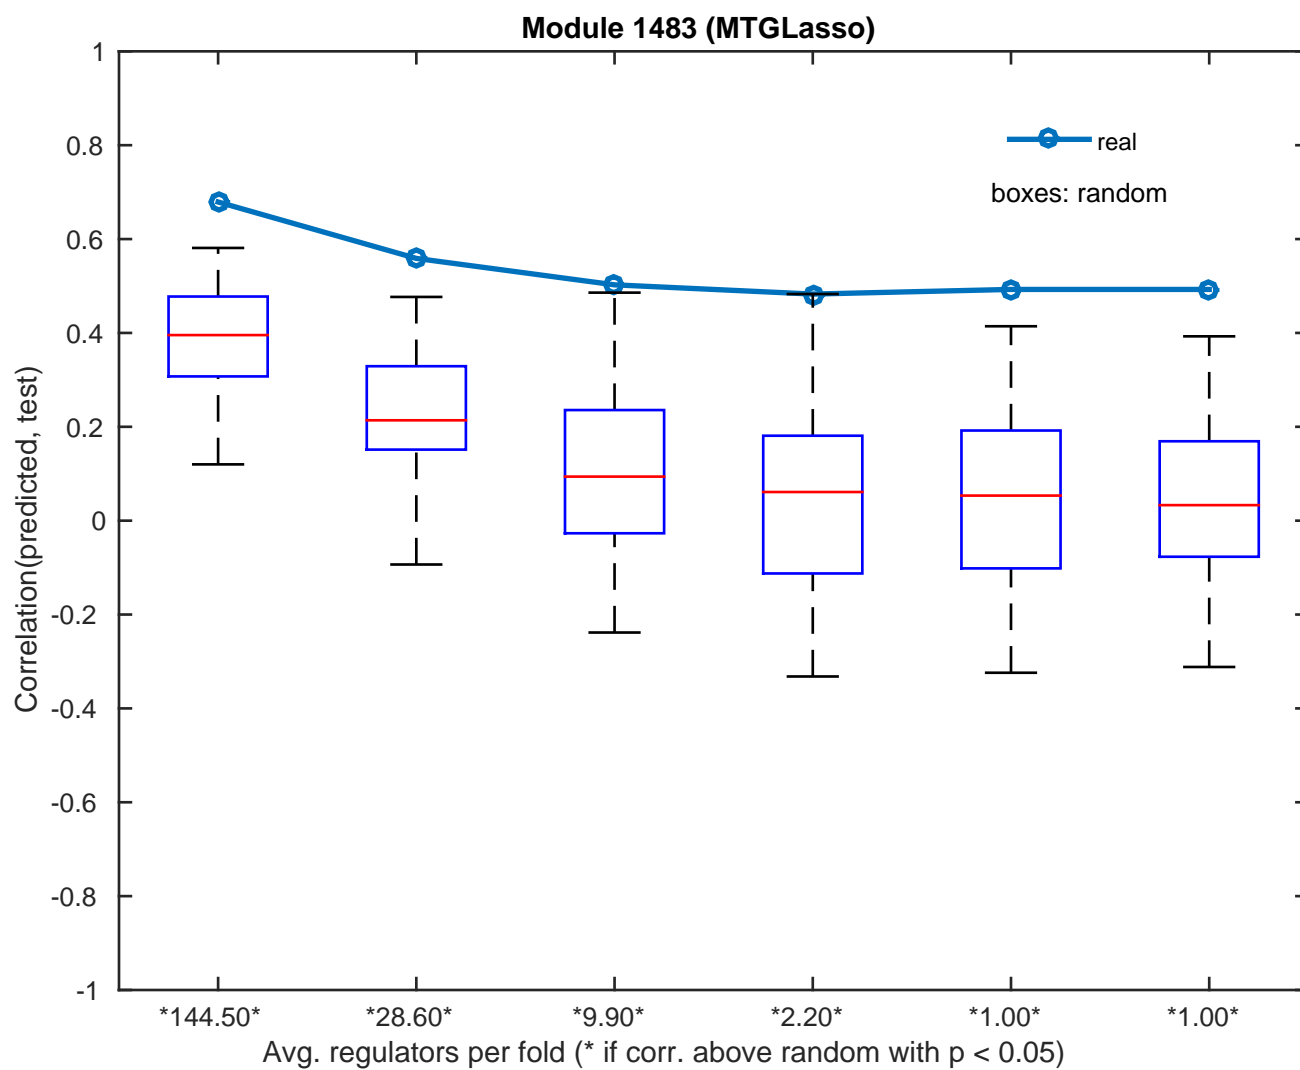

Supplement: S24 (10.1371/journal.pcbi.1005013.s024) [file journal.pcbi.1005013.s024]

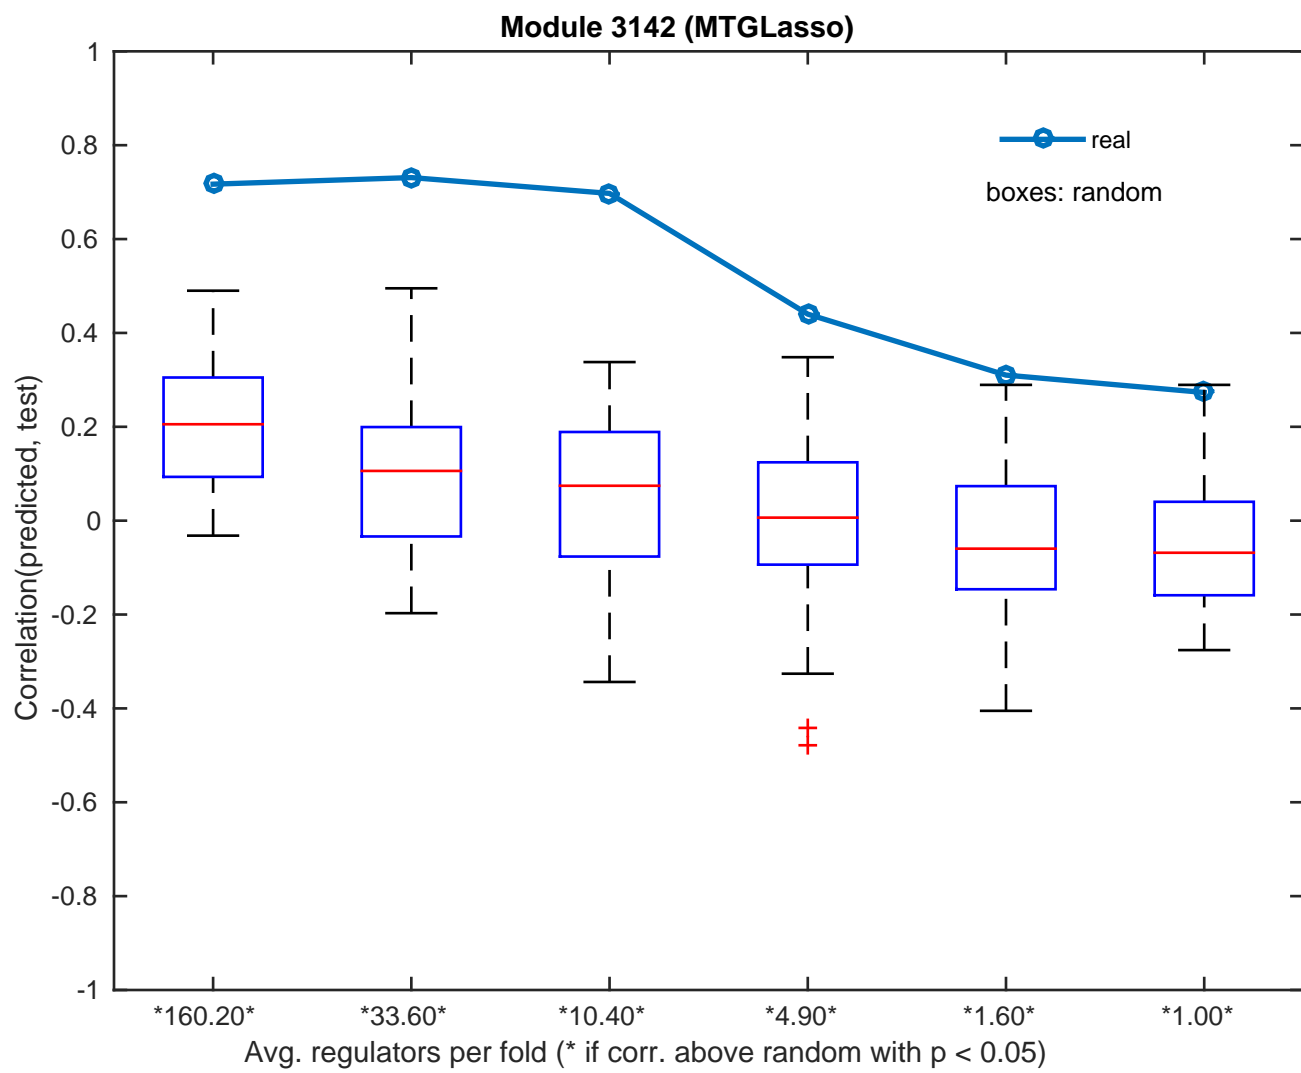

Supplement: S24 (10.1371/journal.pcbi.1005013.s024) [file journal.pcbi.1005013.s024]

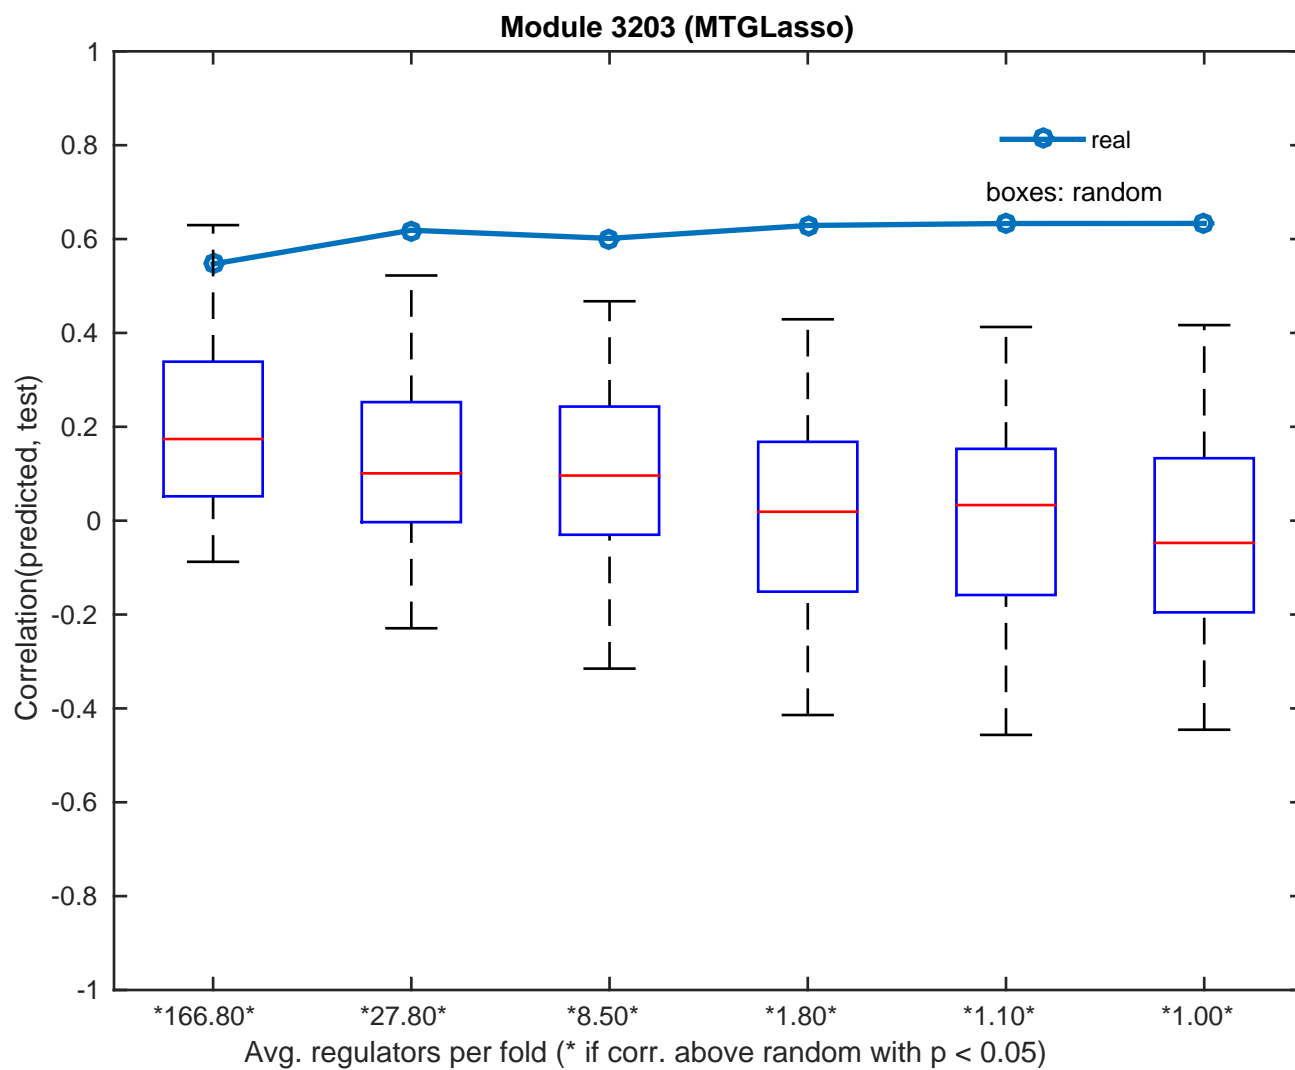

Supplement: S24 (10.1371/journal.pcbi.1005013.s024) [file journal.pcbi.1005013.s024]

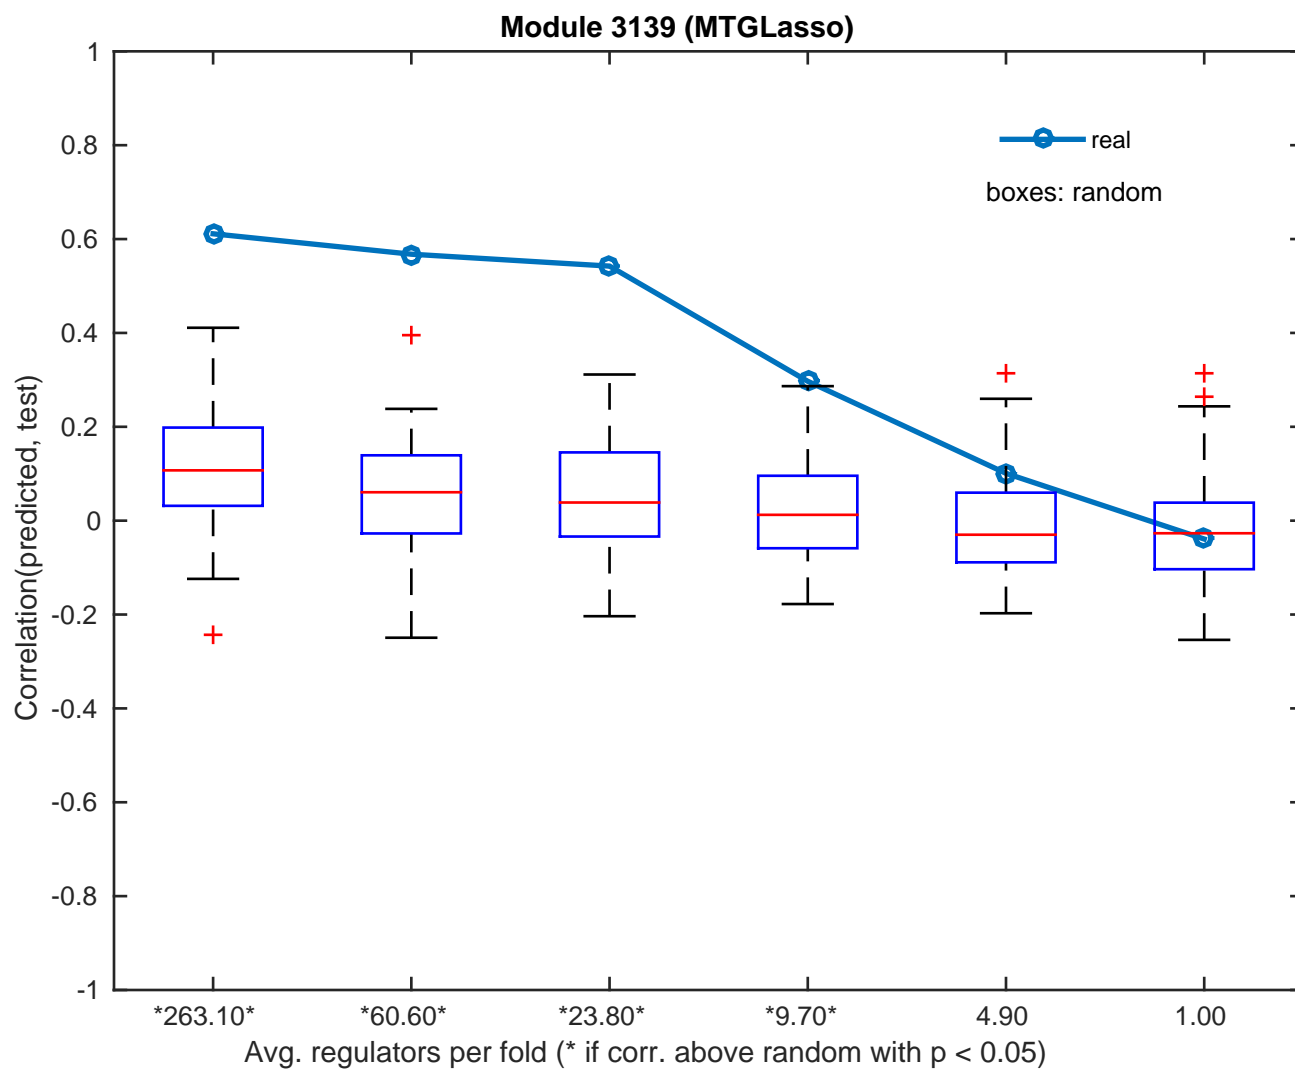

Supplement: S24 (10.1371/journal.pcbi.1005013.s024) [file journal.pcbi.1005013.s024]

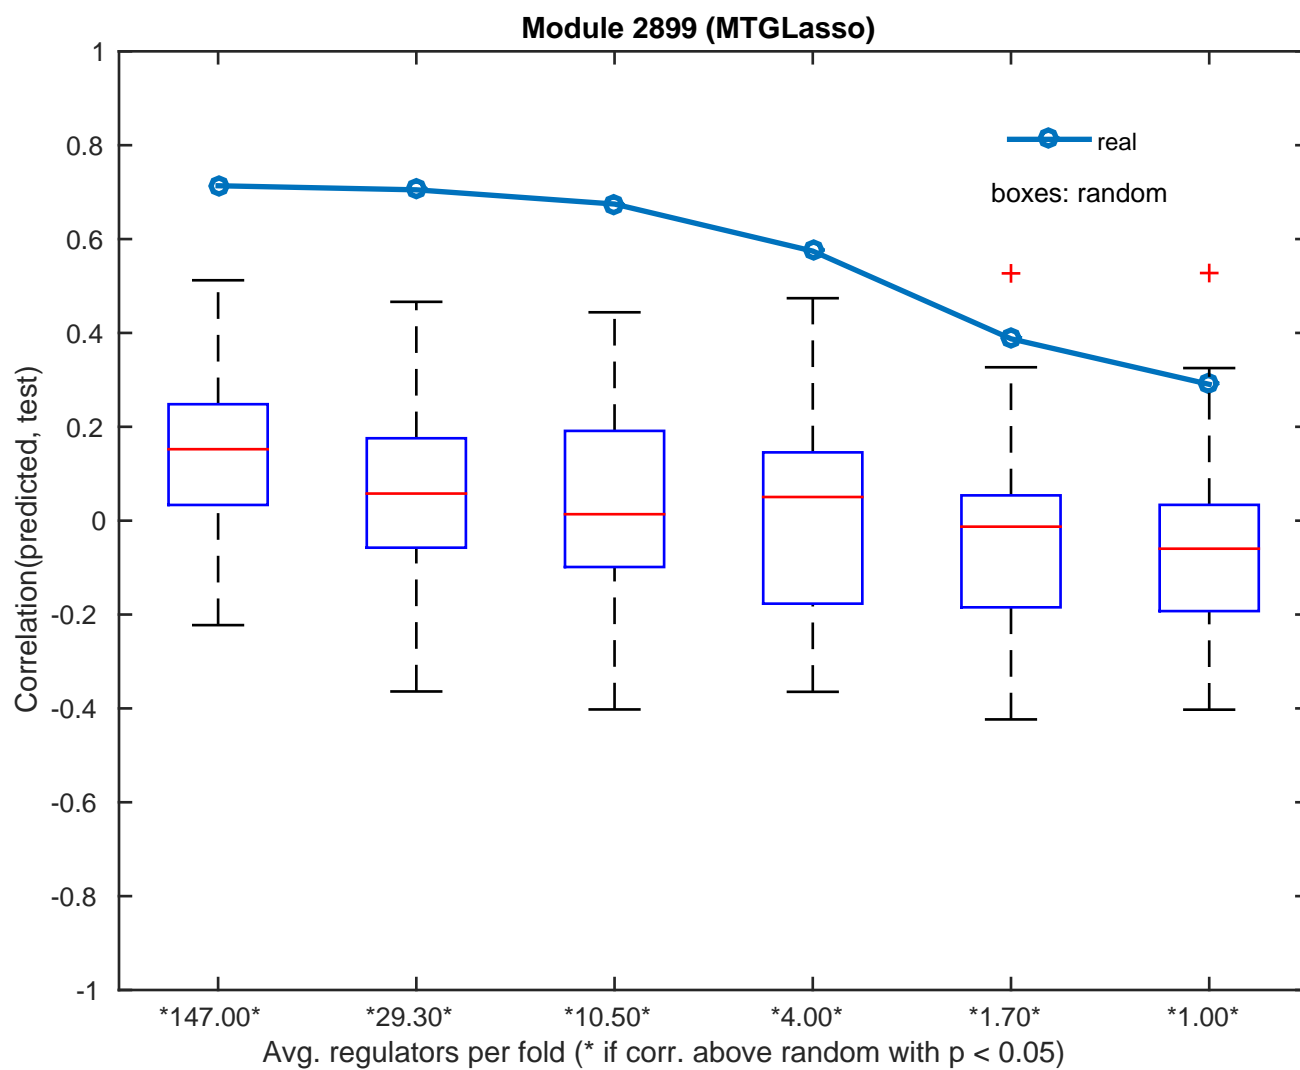

Supplement: S24 (10.1371/journal.pcbi.1005013.s024) [file journal.pcbi.1005013.s024]

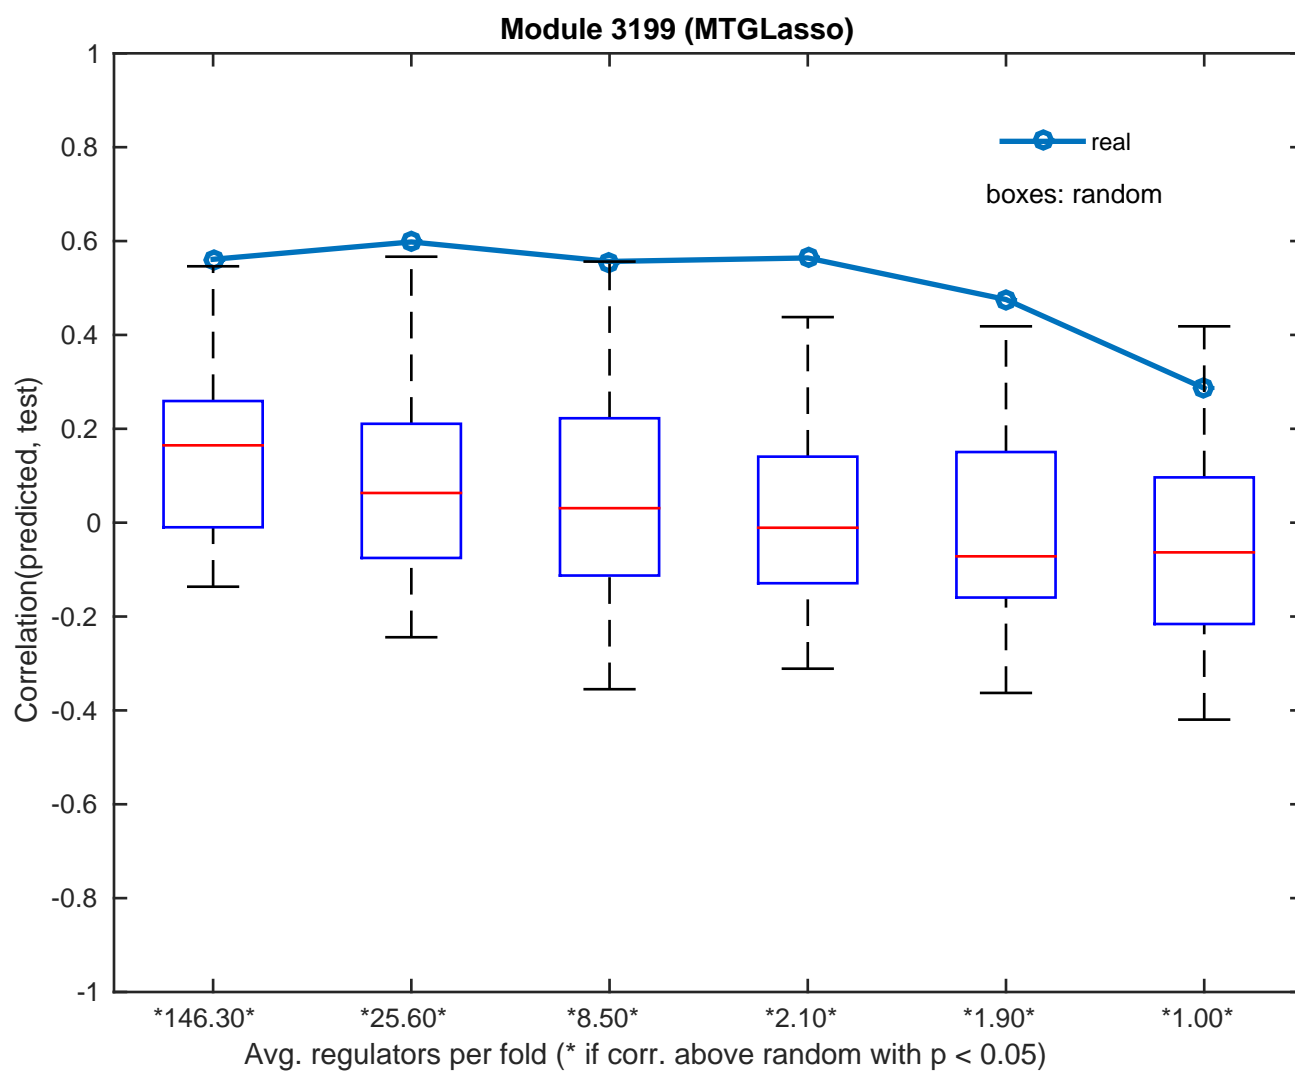

Supplement: S24 (10.1371/journal.pcbi.1005013.s024) [file journal.pcbi.1005013.s024]

Module 1588 (MTGLasso)

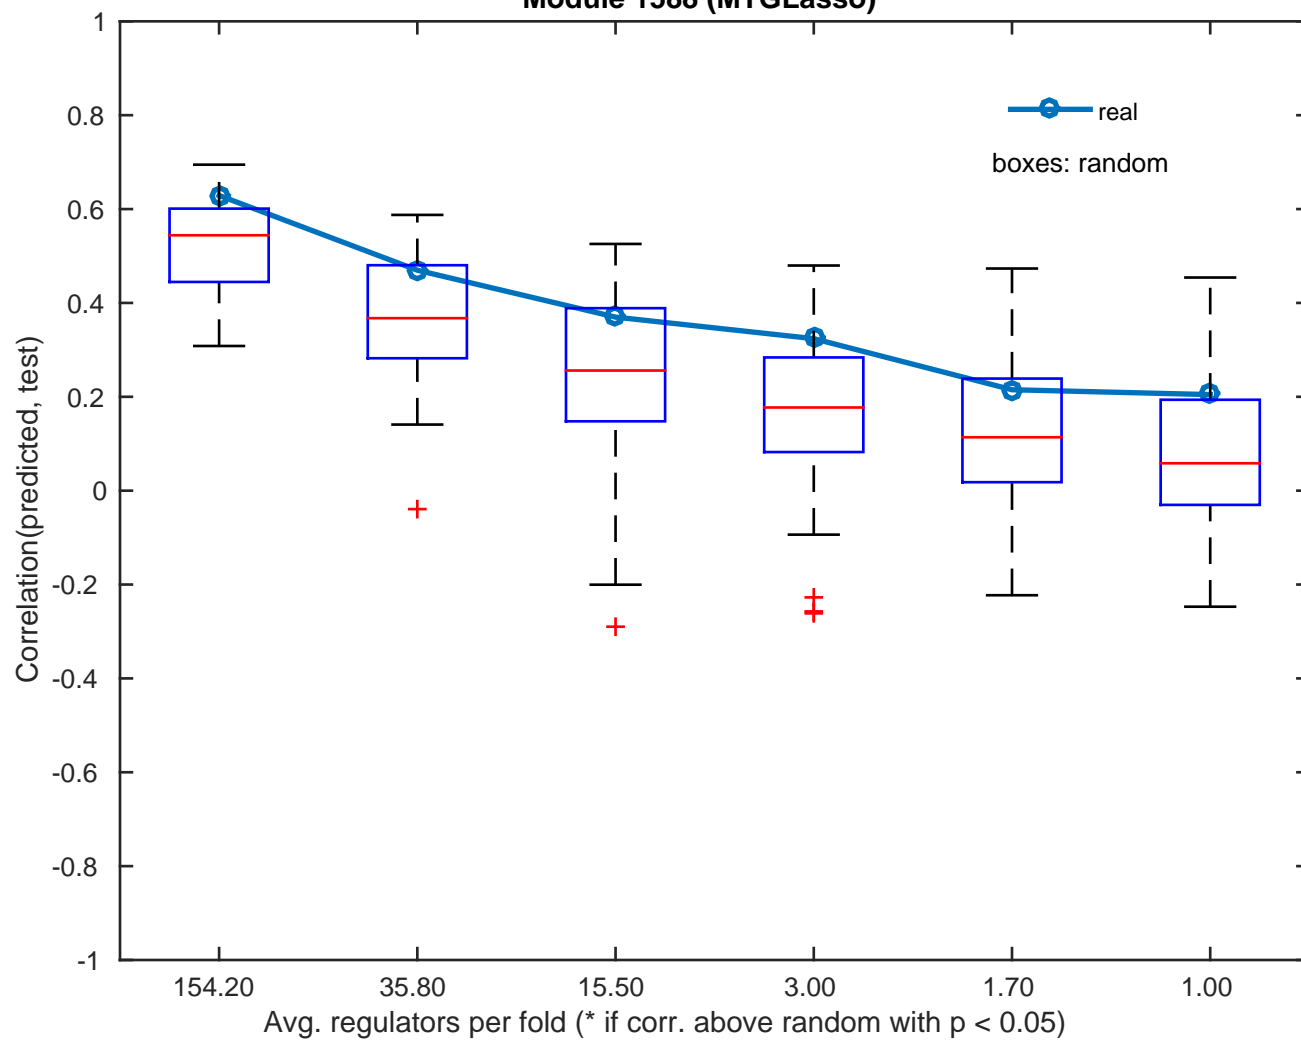

Supplement: S24 (10.1371/journal.pcbi.1005013.s024) [file journal.pcbi.1005013.s024]

Module 1500 (MTGLasso)

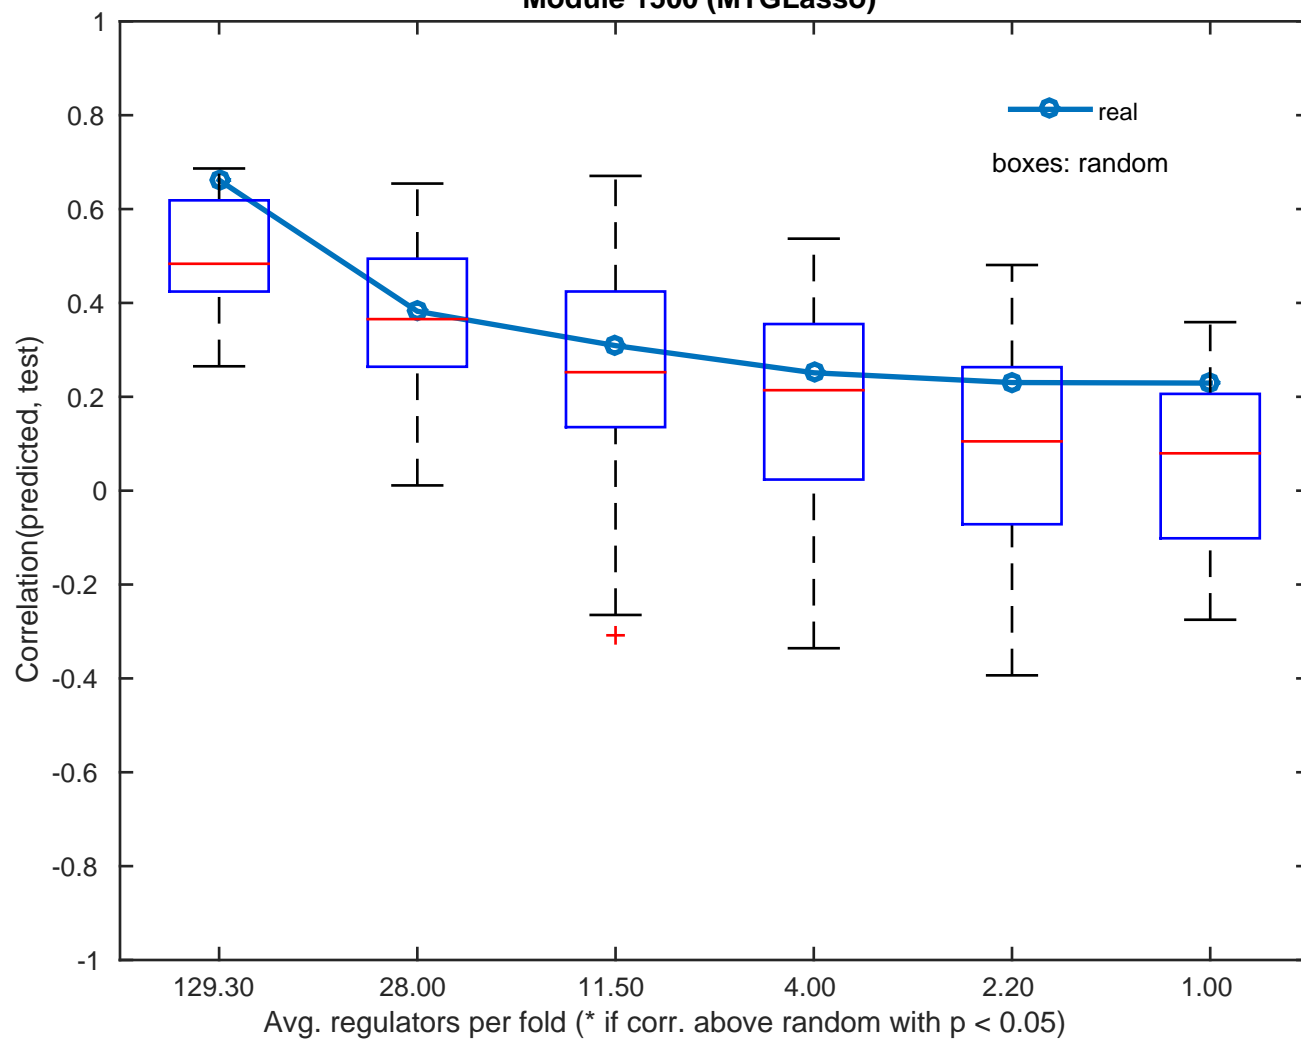

Supplement: S24 (10.1371/journal.pcbi.1005013.s024) [file journal.pcbi.1005013.s024]

### Module 1487 (MTGLasso)

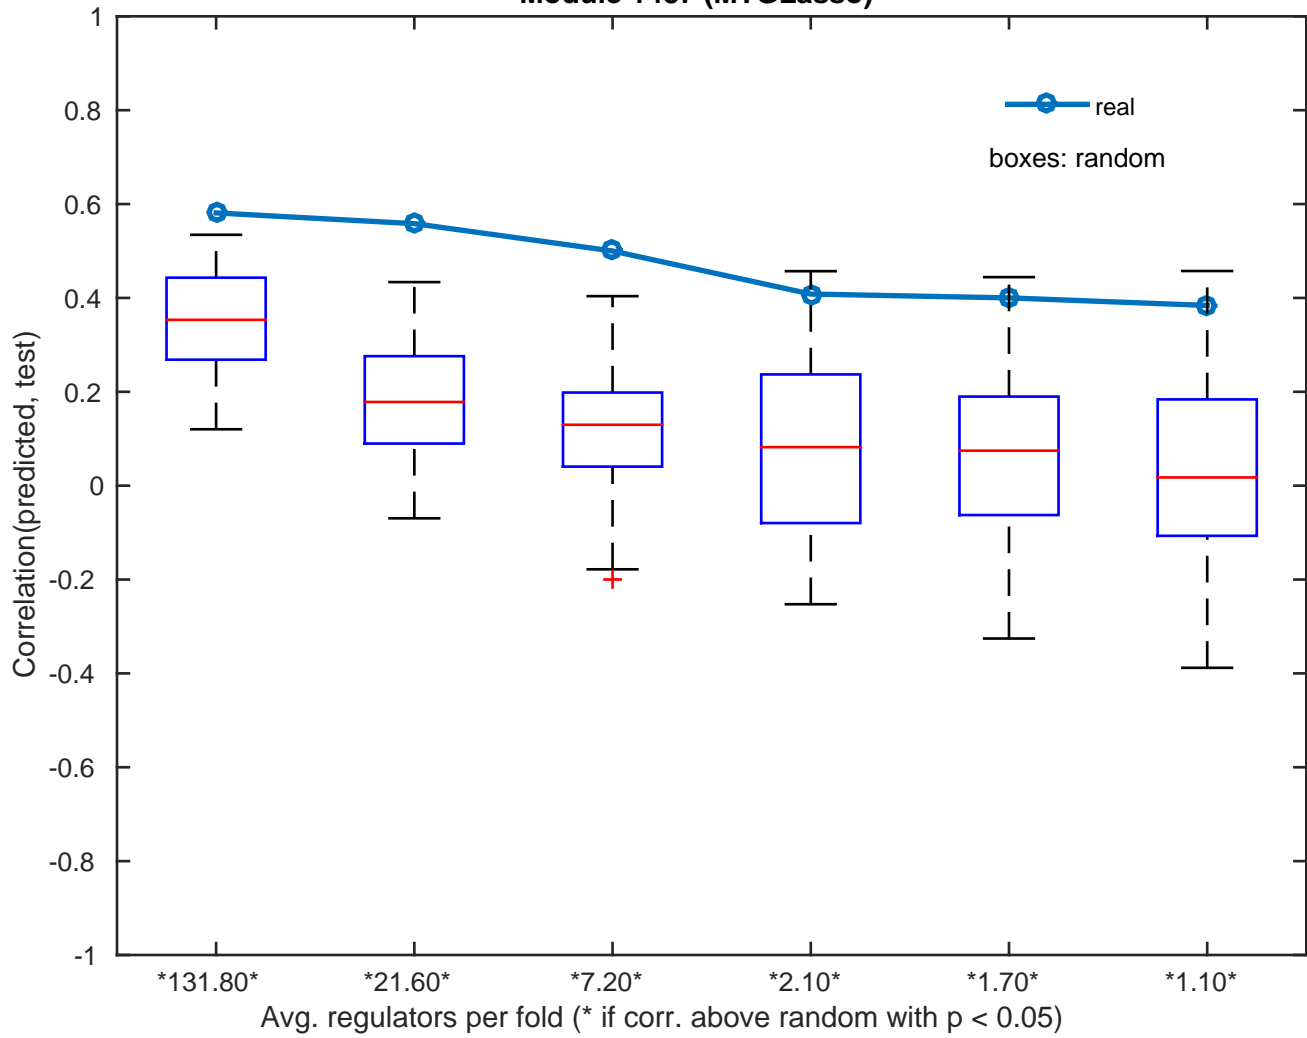

Supplement: S24 (10.1371/journal.pcbi.1005013.s024) [file journal.pcbi.1005013.s024]

Module 1553 (MTGLasso)

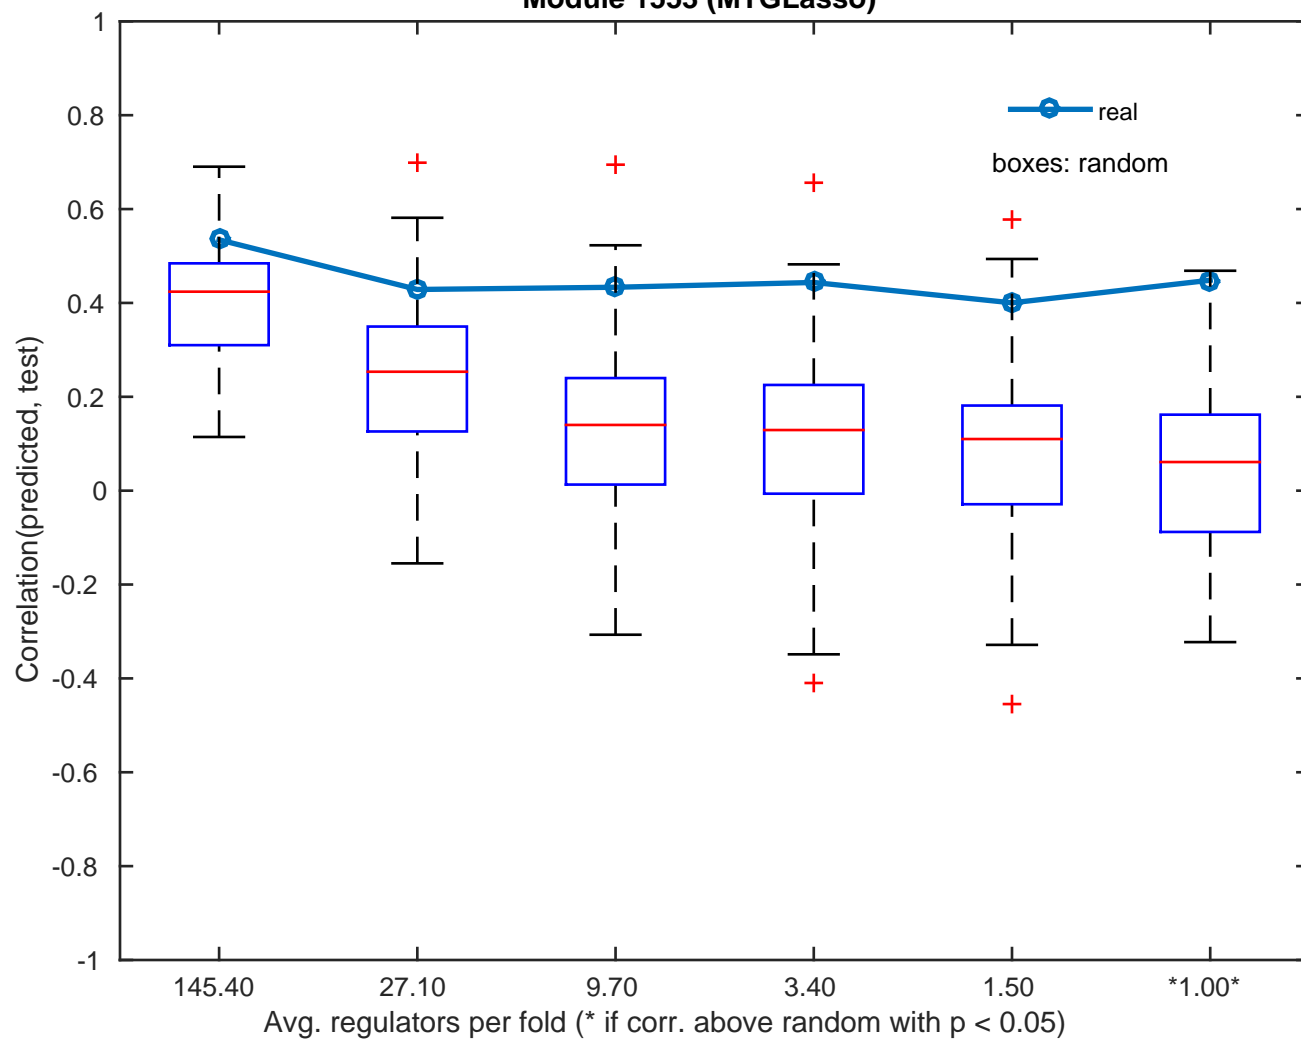

Supplement: S24 (10.1371/journal.pcbi.1005013.s024) [file journal.pcbi.1005013.s024]

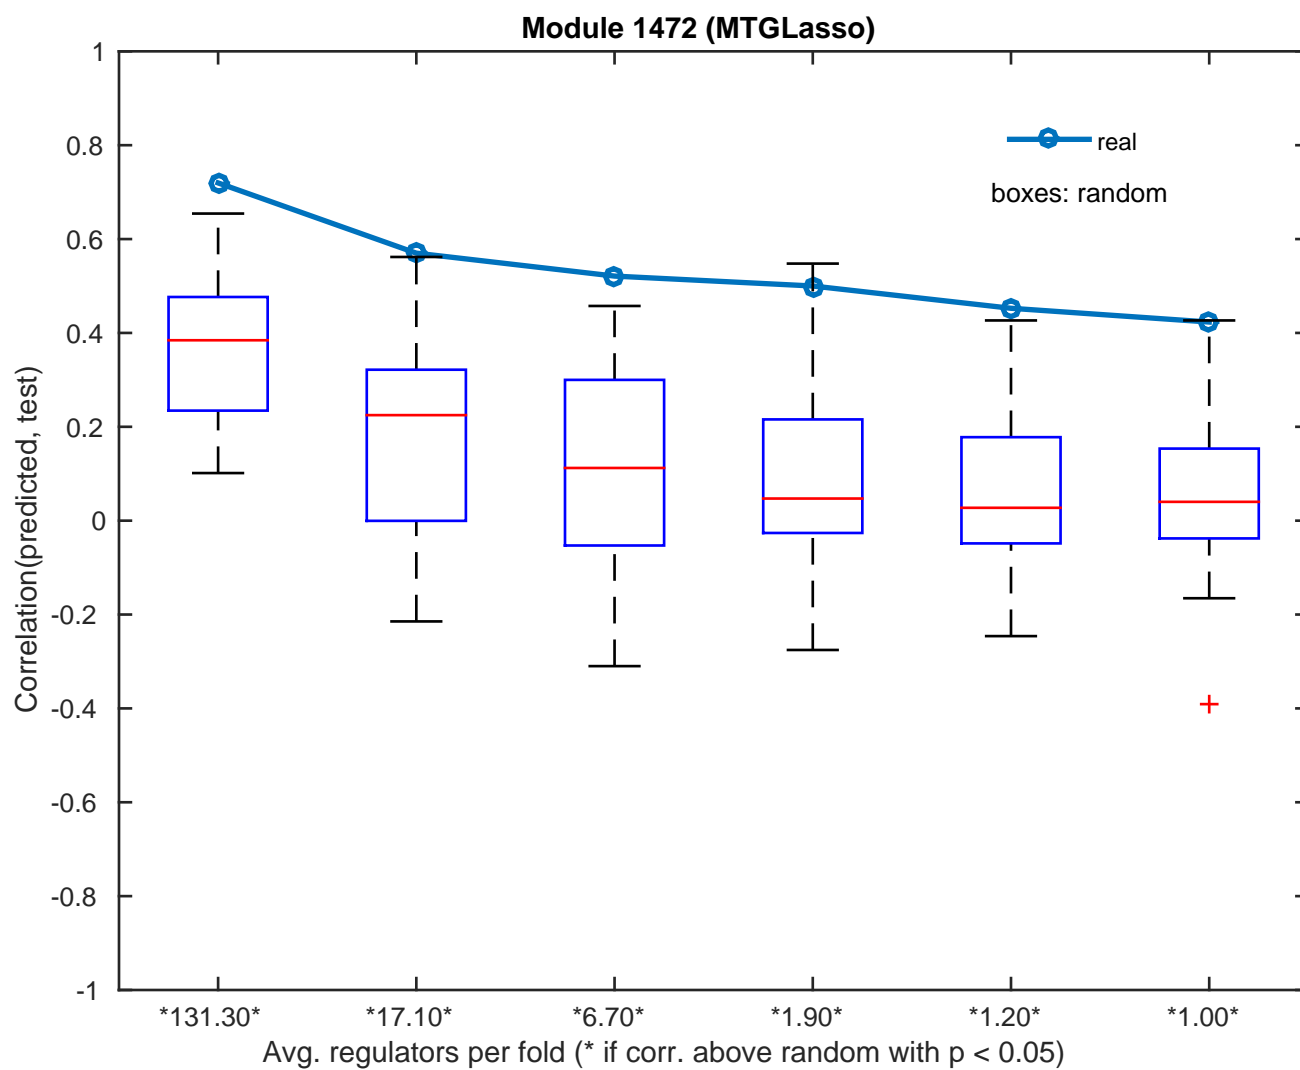

Supplement: S24 (10.1371/journal.pcbi.1005013.s024) [file journal.pcbi.1005013.s024]

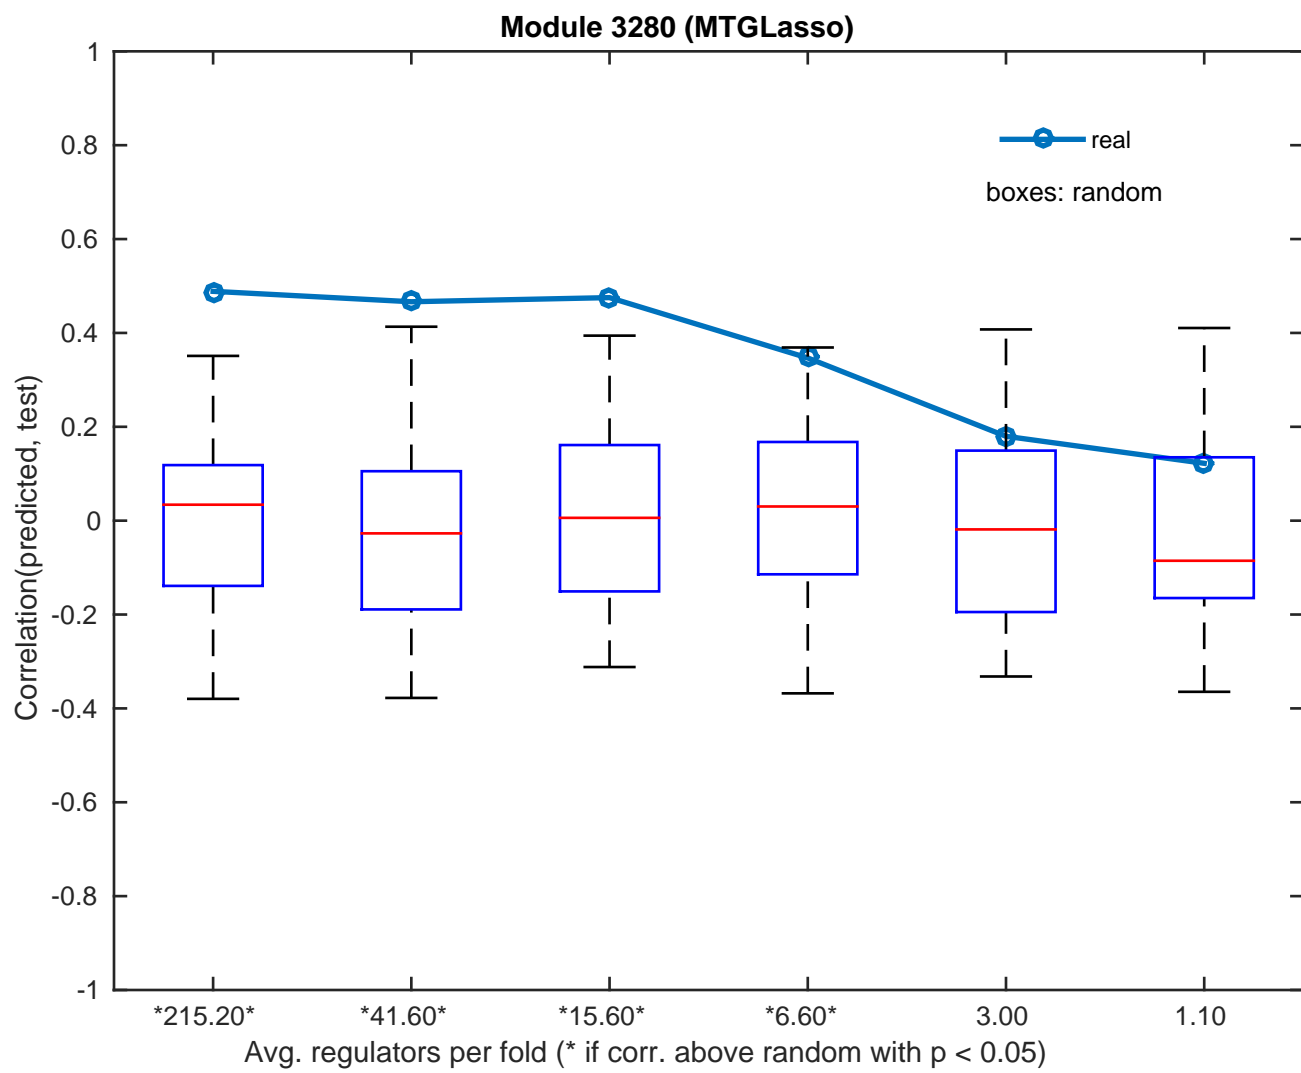

Supplement: S24 (10.1371/journal.pcbi.1005013.s024) [file journal.pcbi.1005013.s024]

Module 1593 (MTGLasso)

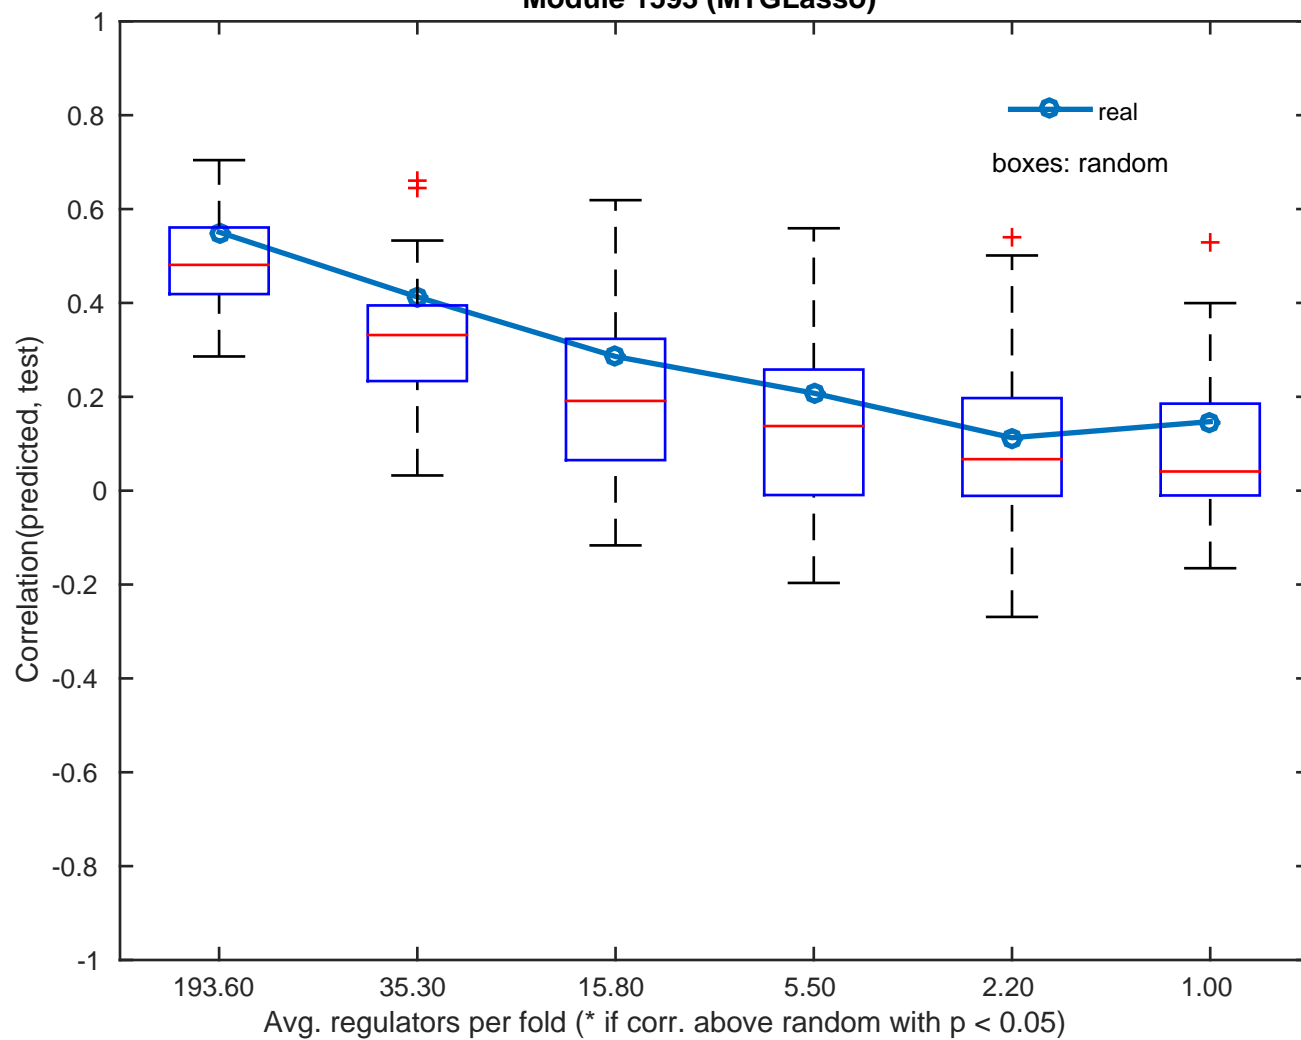

Supplement: S24 (10.1371/journal.pcbi.1005013.s024) [file journal.pcbi.1005013.s024]

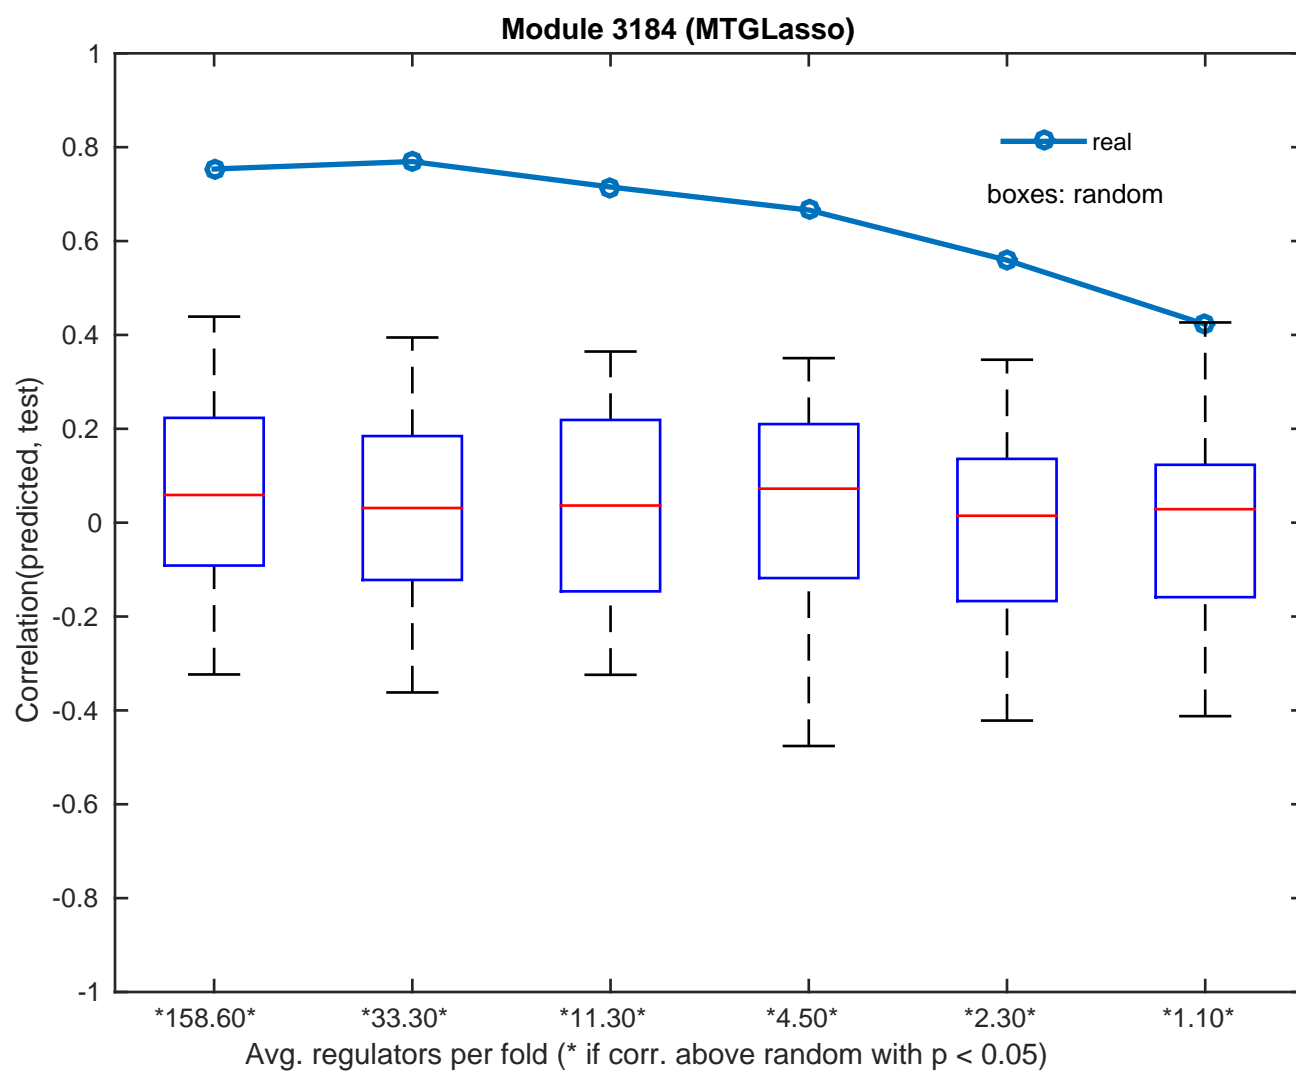

Supplement: S24 (10.1371/journal.pcbi.1005013.s024) [file journal.pcbi.1005013.s024]

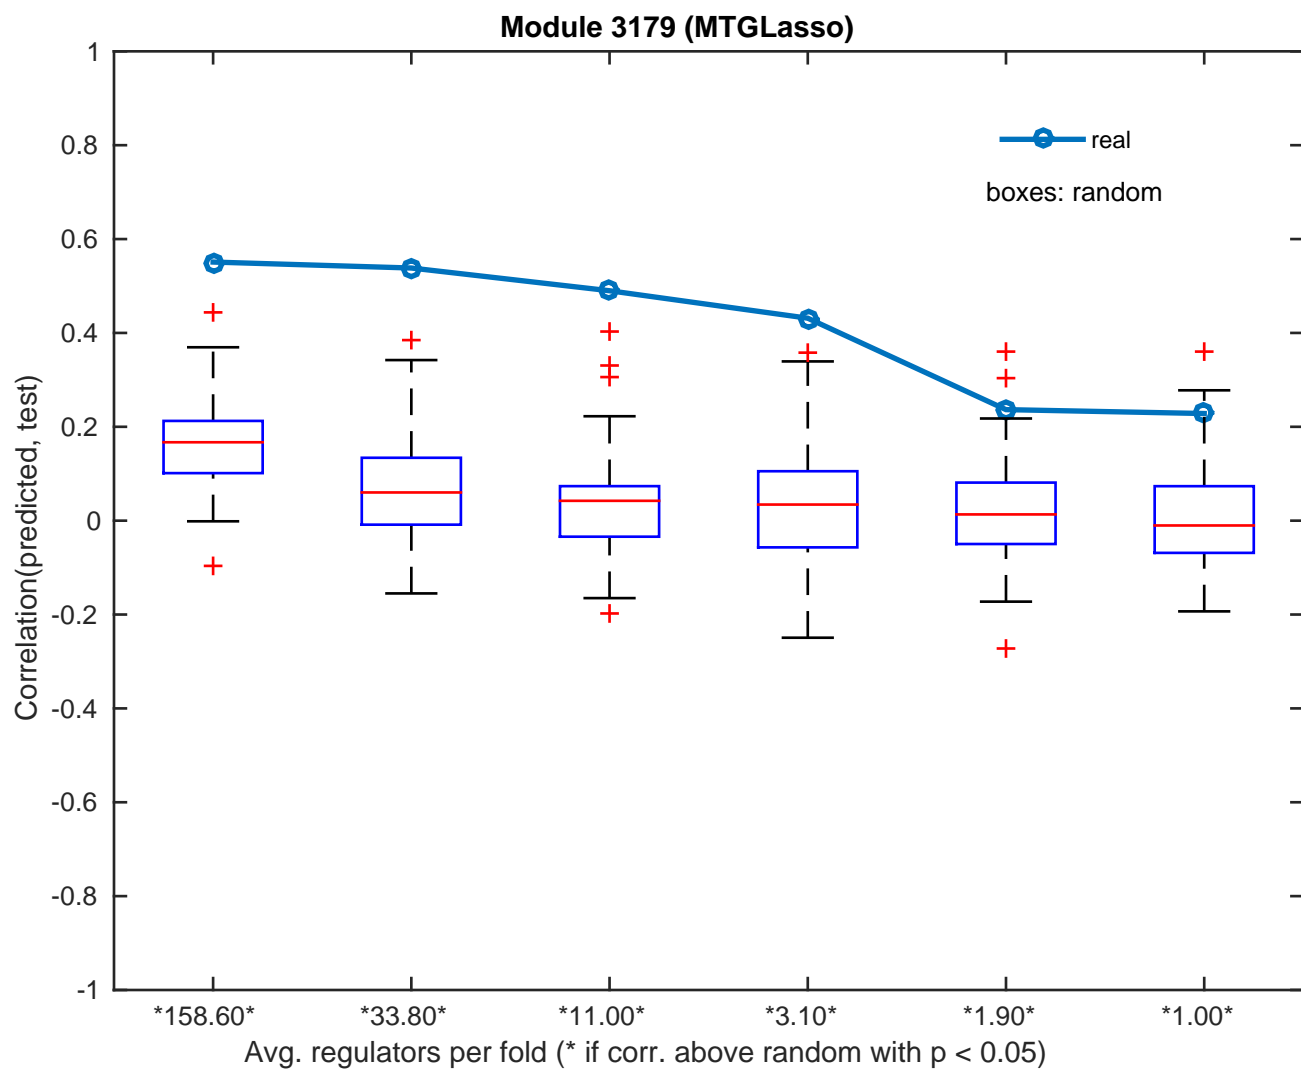

Supplement: S24 (10.1371/journal.pcbi.1005013.s024) [file journal.pcbi.1005013.s024]

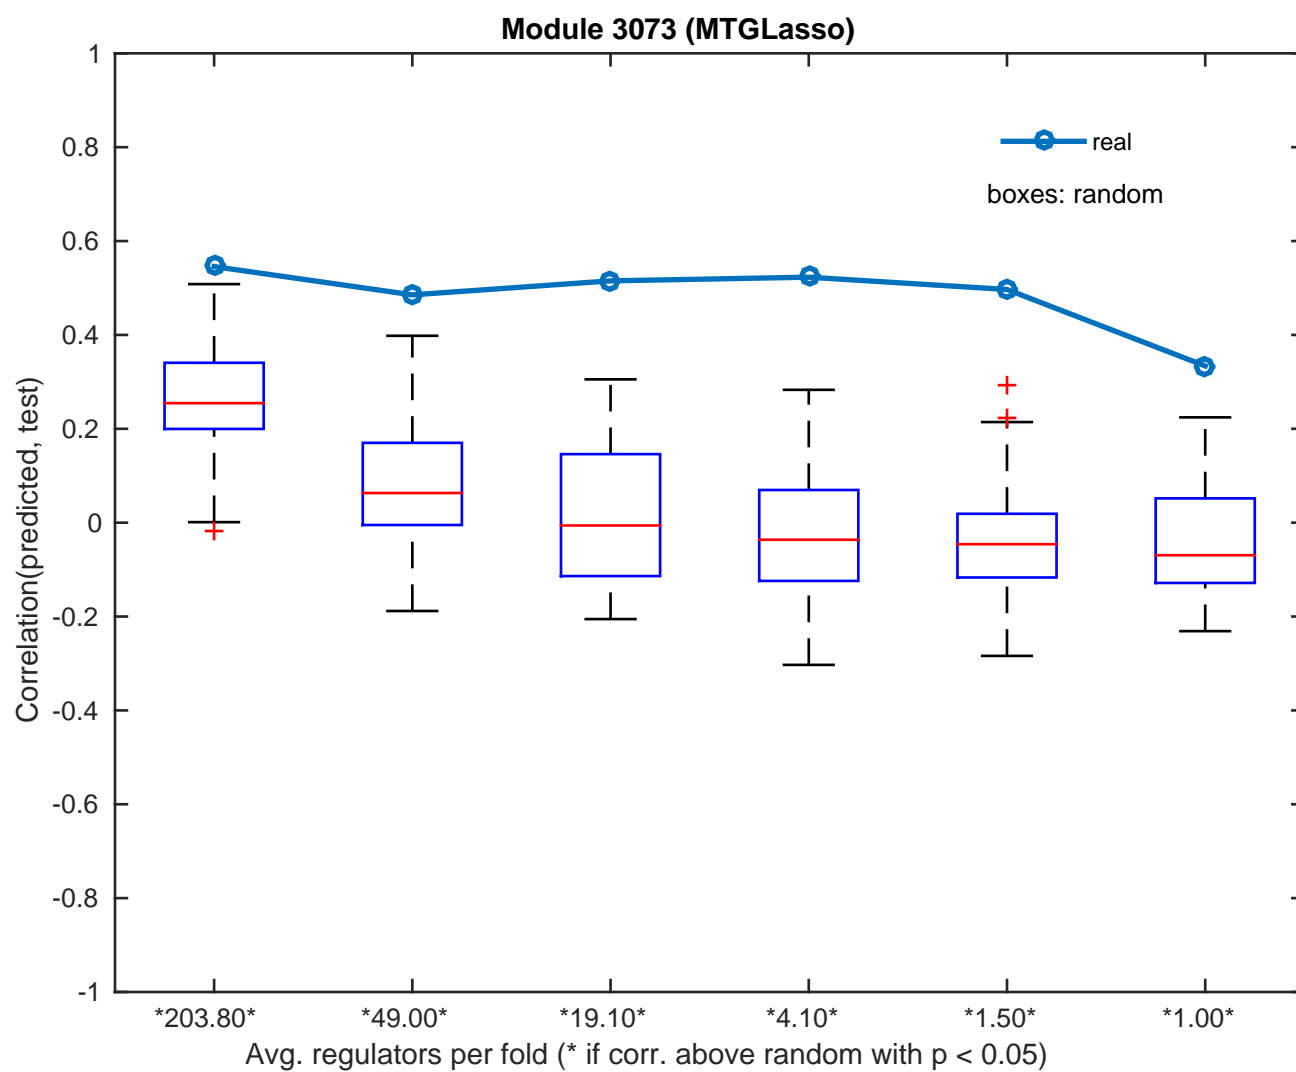

Supplement: S24 (10.1371/journal.pcbi.1005013.s024) [file journal.pcbi.1005013.s024]

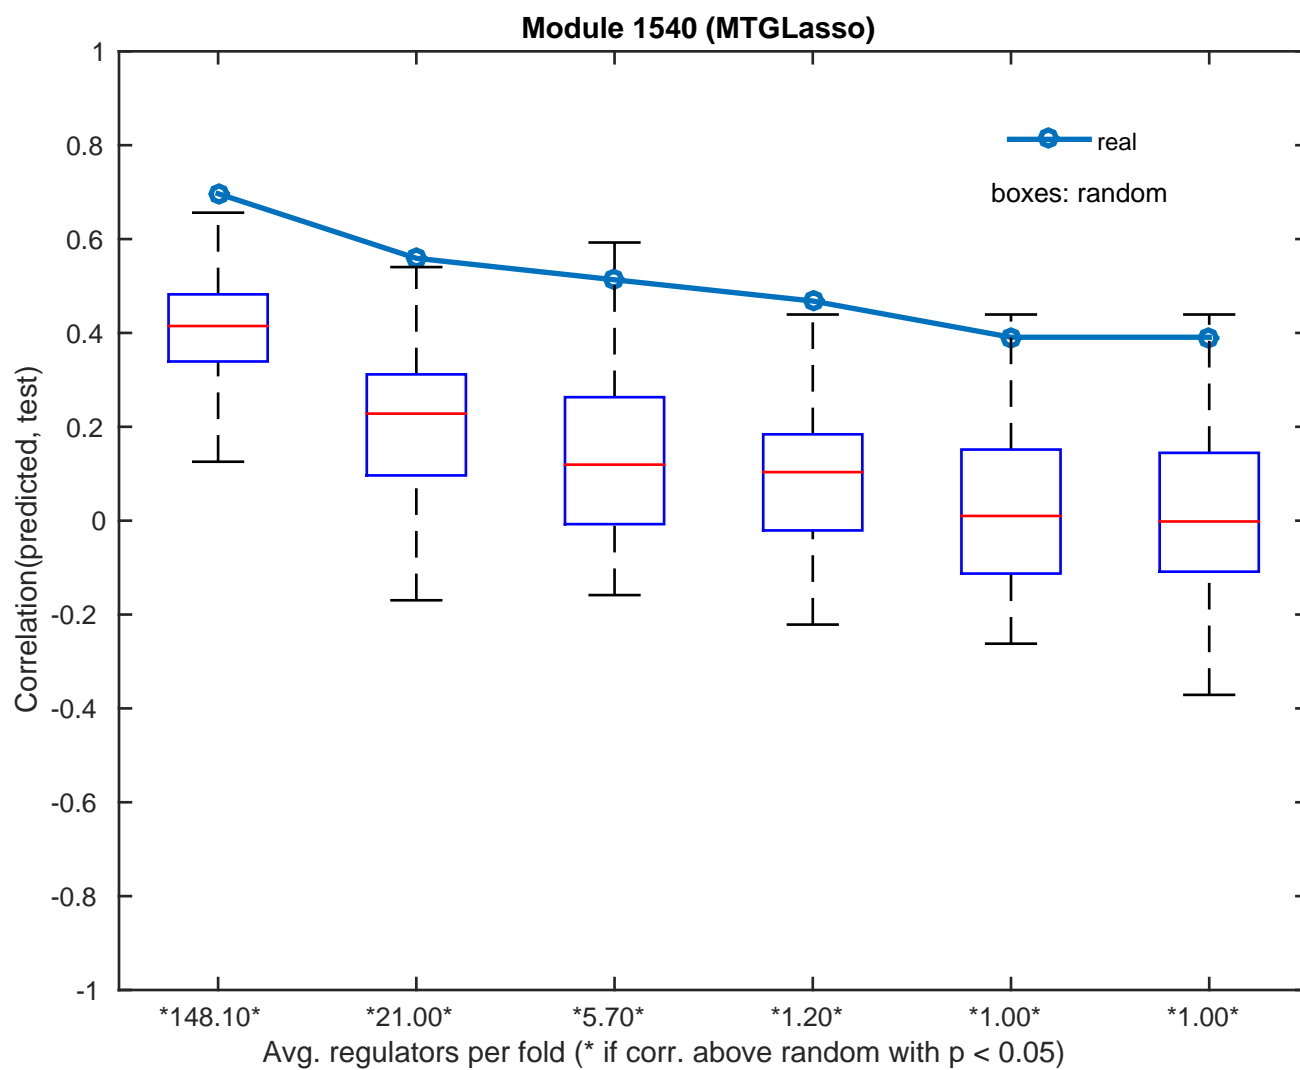

Supplement: S24 (10.1371/journal.pcbi.1005013.s024) [file journal.pcbi.1005013.s024]

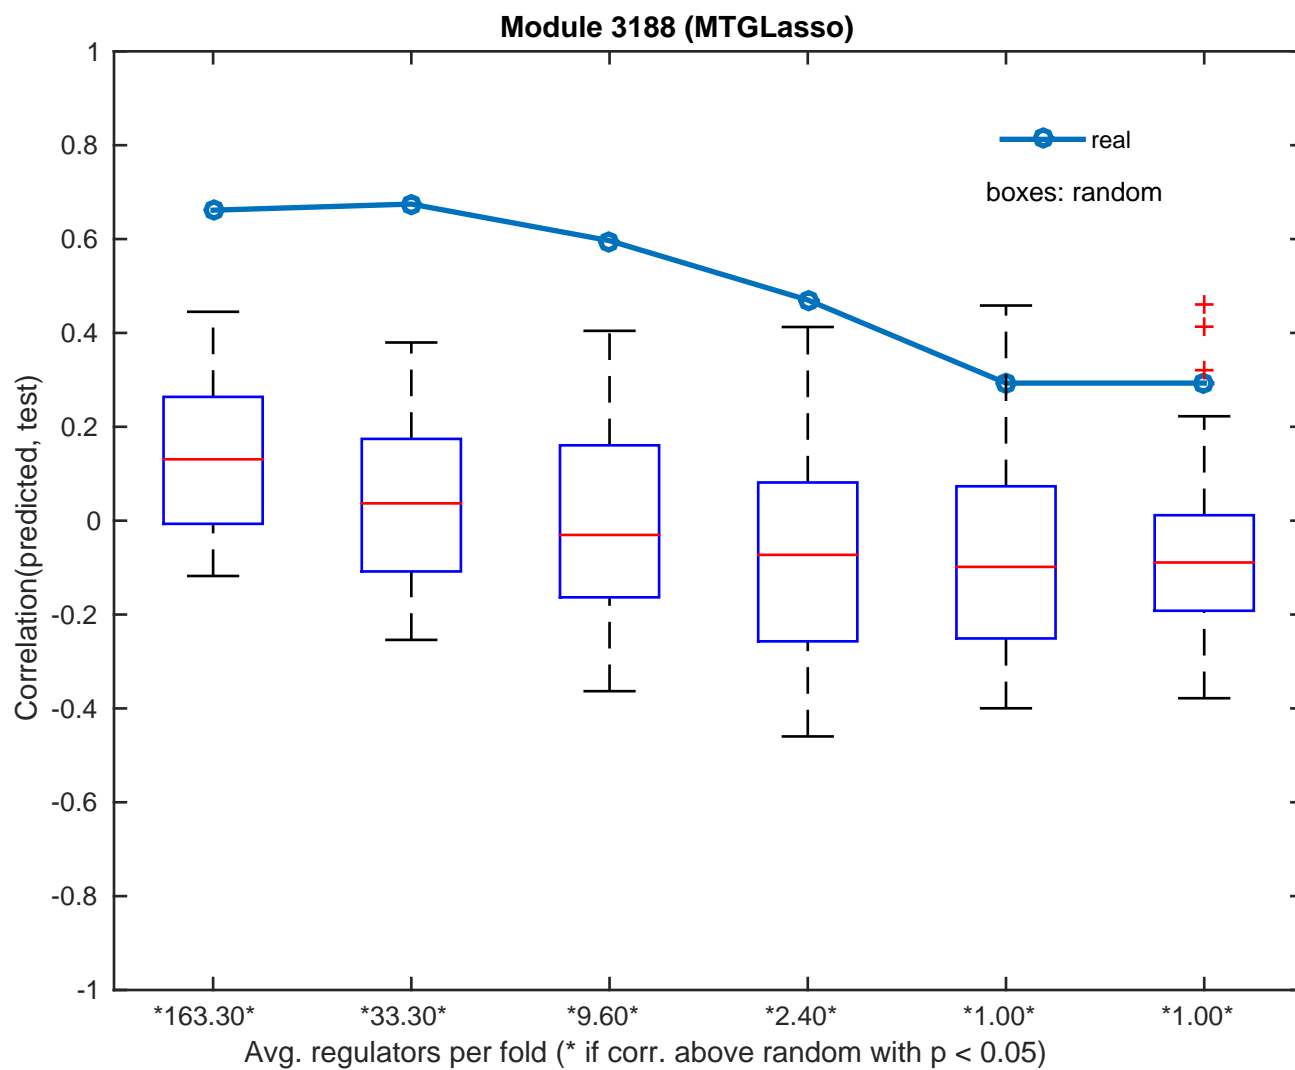

Supplement: S24 (10.1371/journal.pcbi.1005013.s024) [file journal.pcbi.1005013.s024]

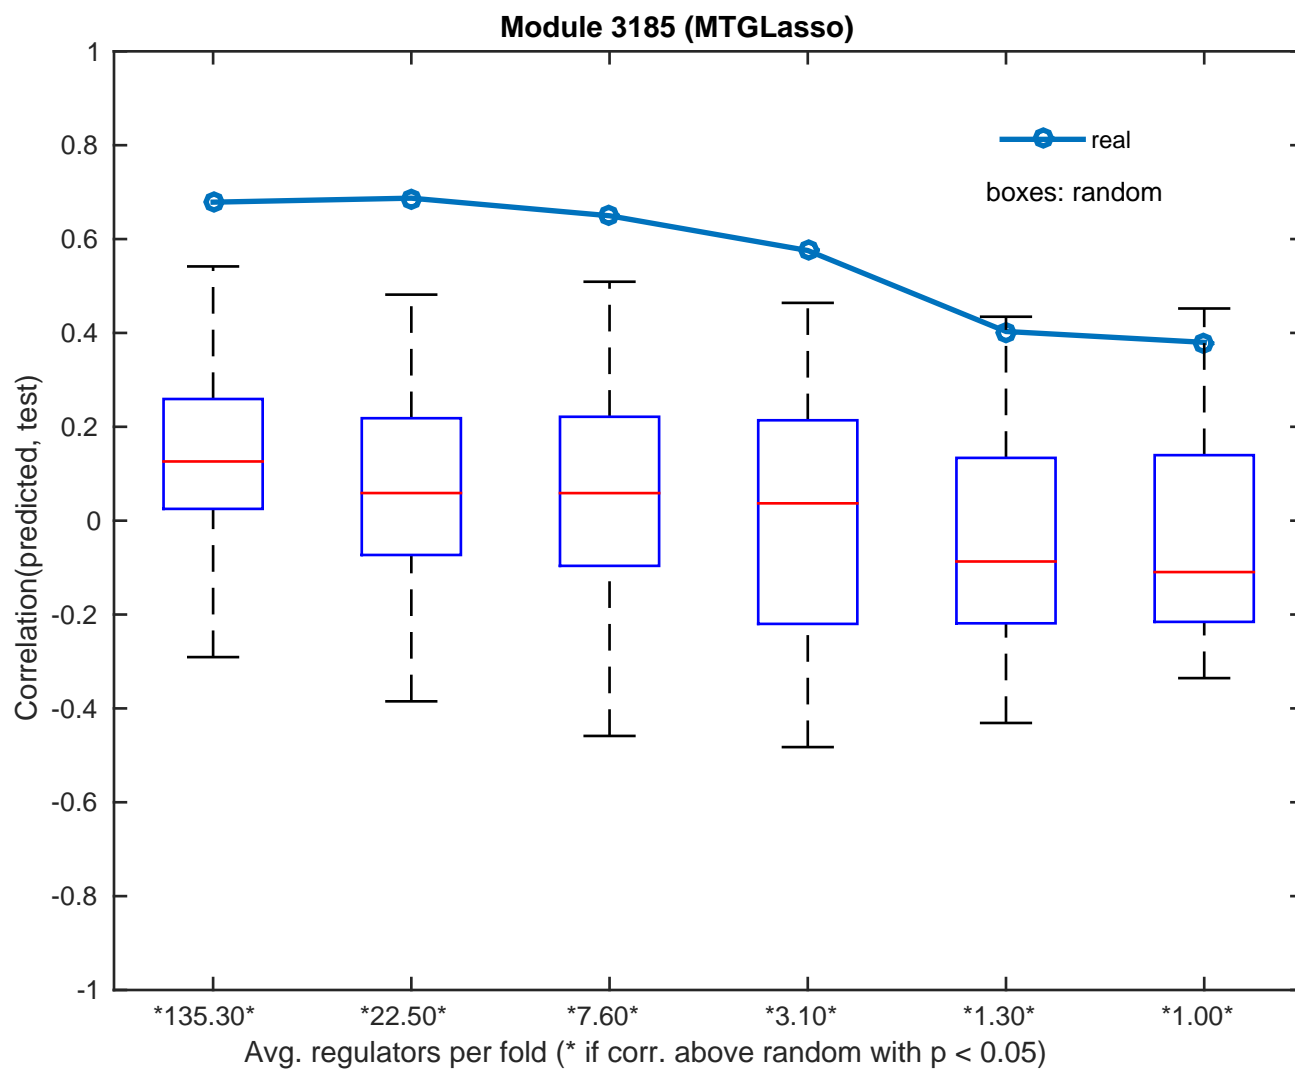

Supplement: S24 (10.1371/journal.pcbi.1005013.s024) [file journal.pcbi.1005013.s024]

Module 1625 (MTGLasso)

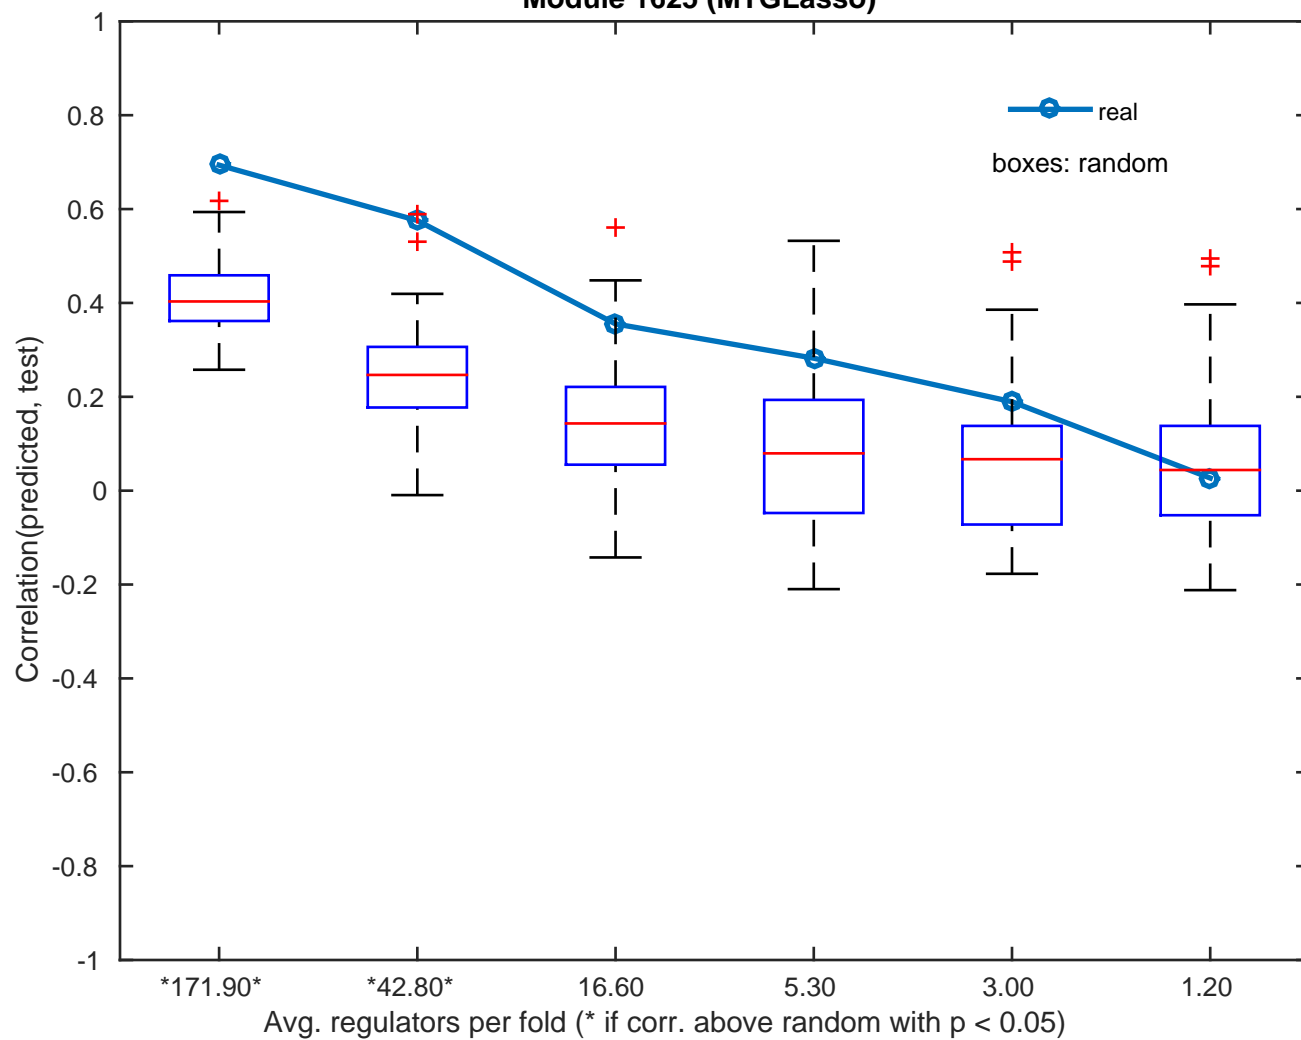

Supplement: S24 (10.1371/journal.pcbi.1005013.s024) [file journal.pcbi.1005013.s024]

Module 1329 (MTGLasso)

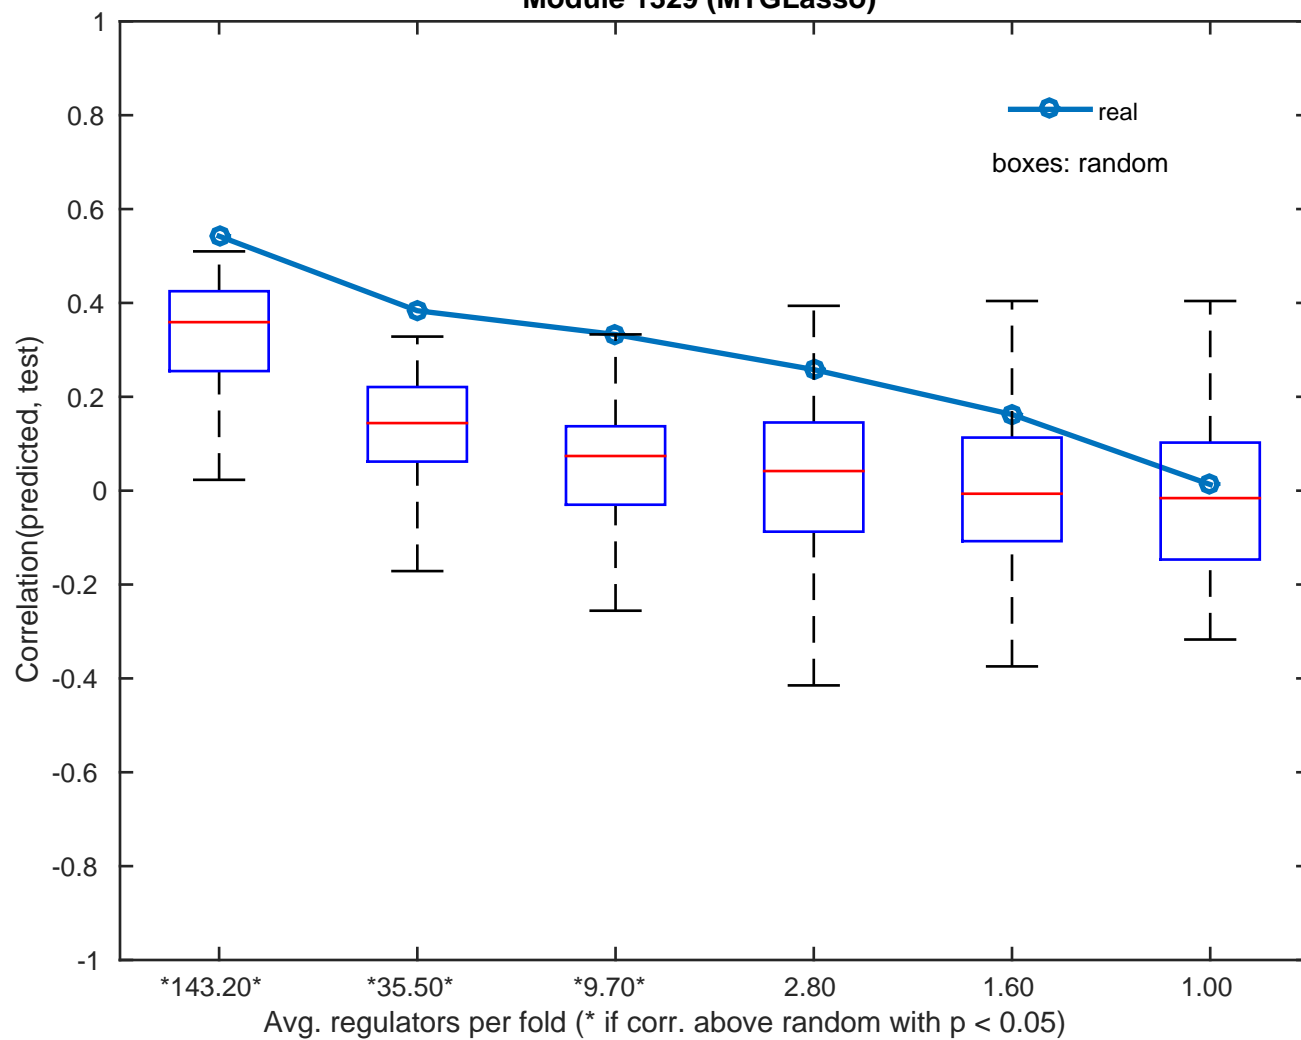

Supplement: S24 (10.1371/journal.pcbi.1005013.s024) [file journal.pcbi.1005013.s024]

Module 2894 (MTGLasso)

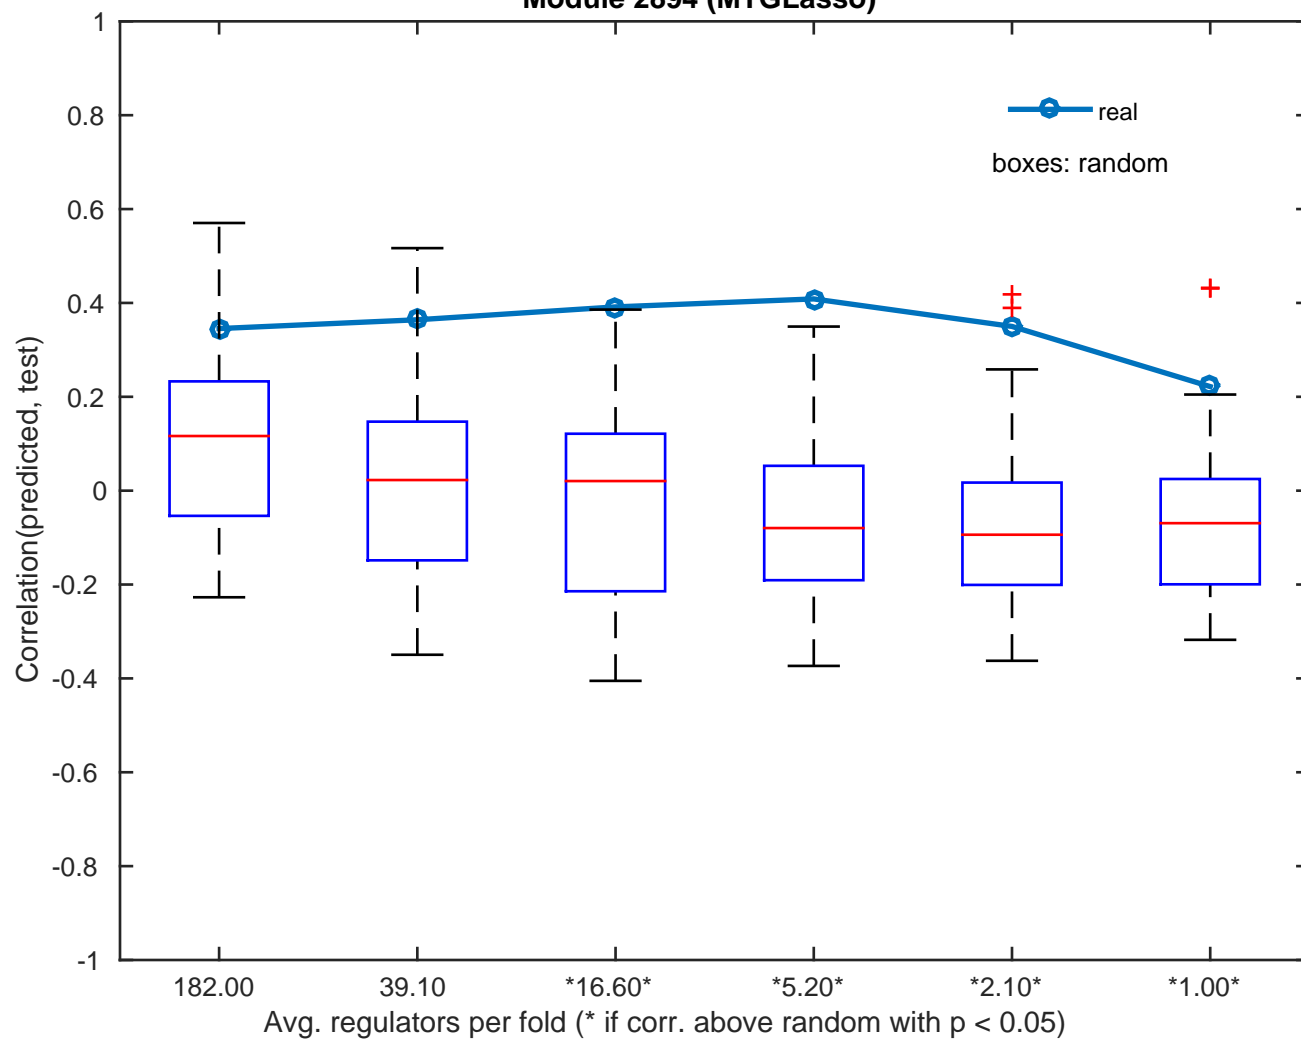

Supplement: S24 (10.1371/journal.pcbi.1005013.s024) [file journal.pcbi.1005013.s024]

Module 1433 (MTGLasso)

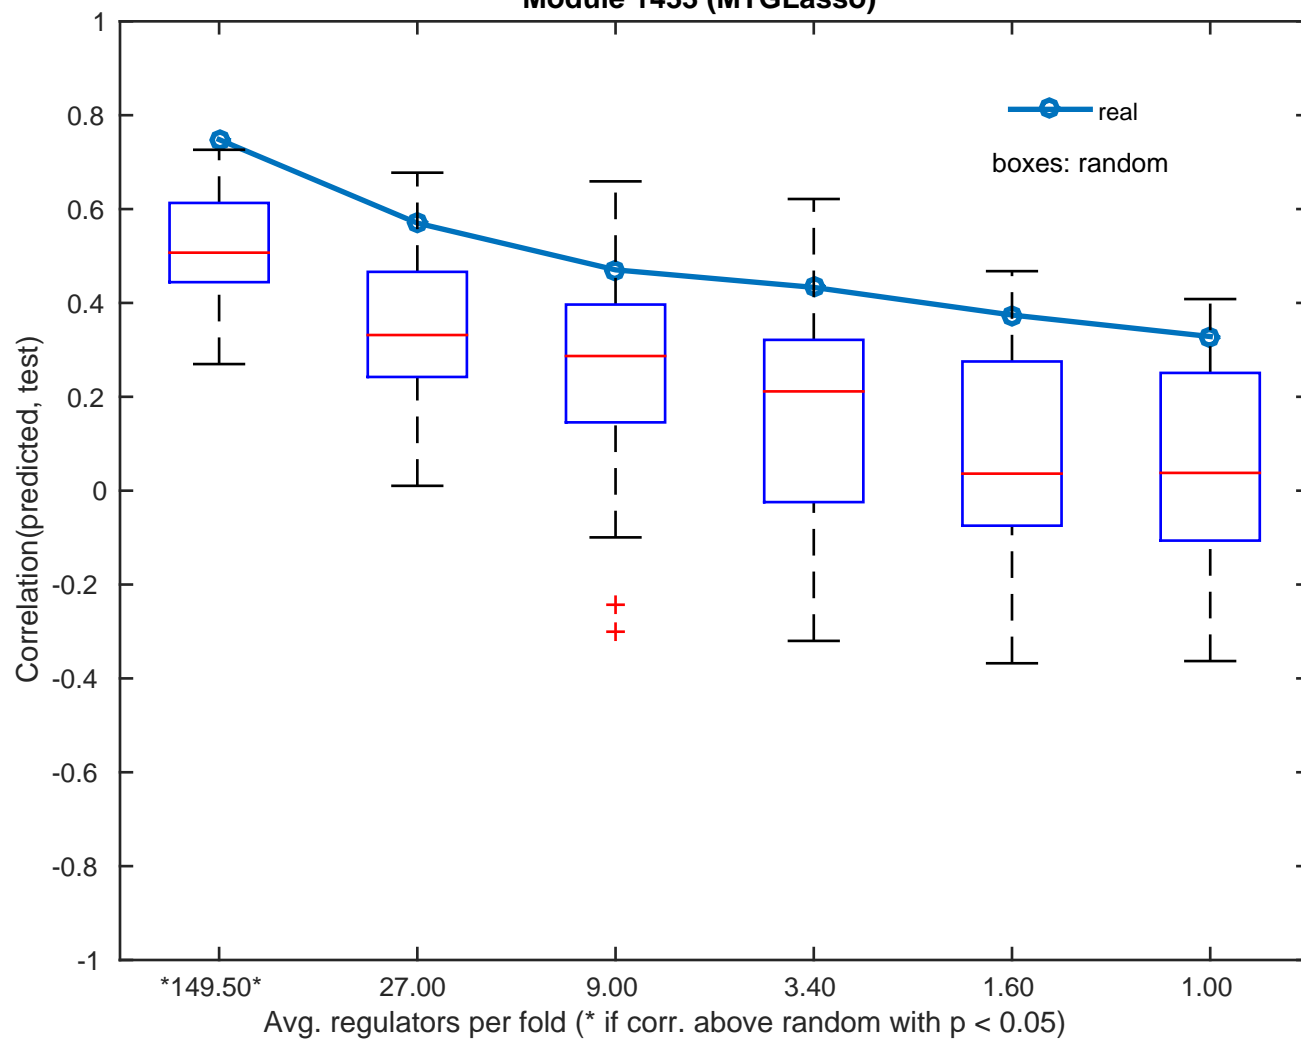

Supplement: S24 (10.1371/journal.pcbi.1005013.s024) [file journal.pcbi.1005013.s024]

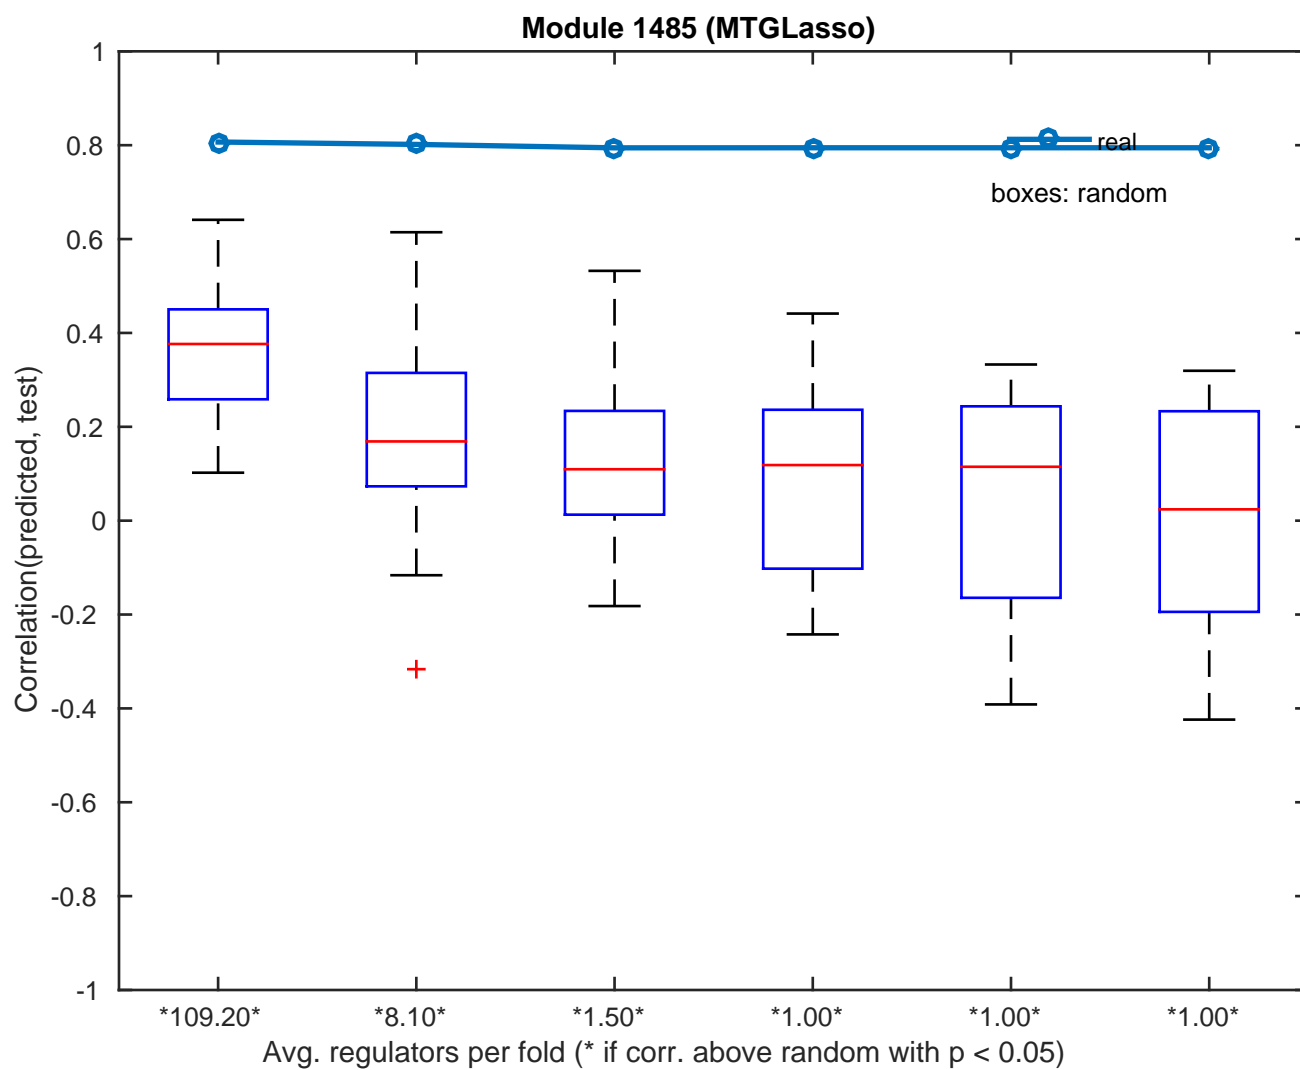

Supplement: S24 (10.1371/journal.pcbi.1005013.s024) [file journal.pcbi.1005013.s024]

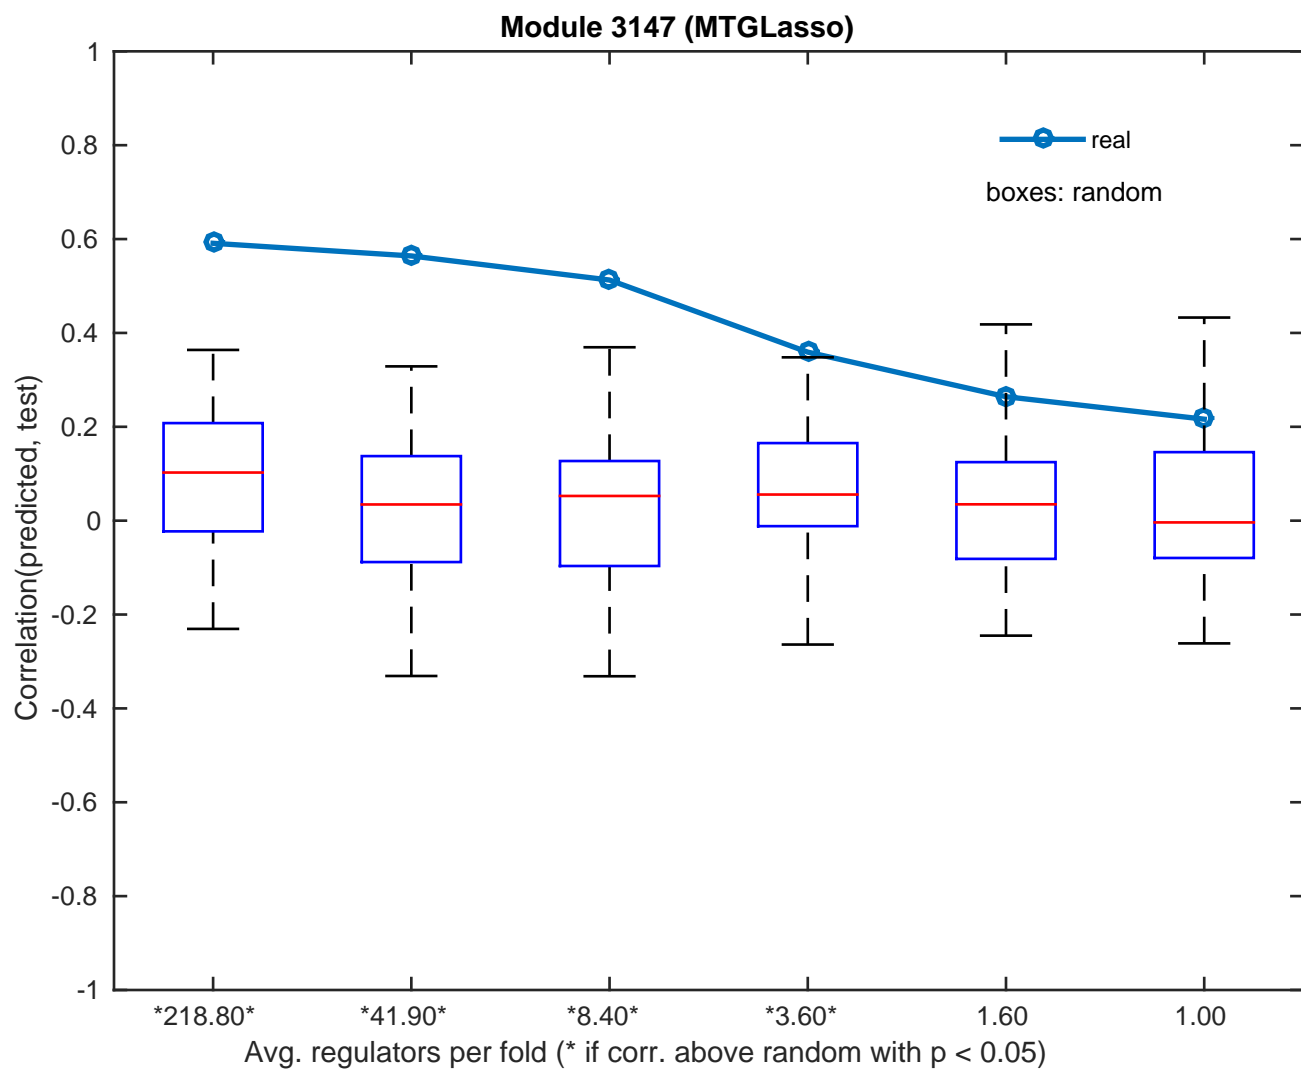

Supplement: S24 (10.1371/journal.pcbi.1005013.s024) [file journal.pcbi.1005013.s024]

Module 1423 (MTGLasso)

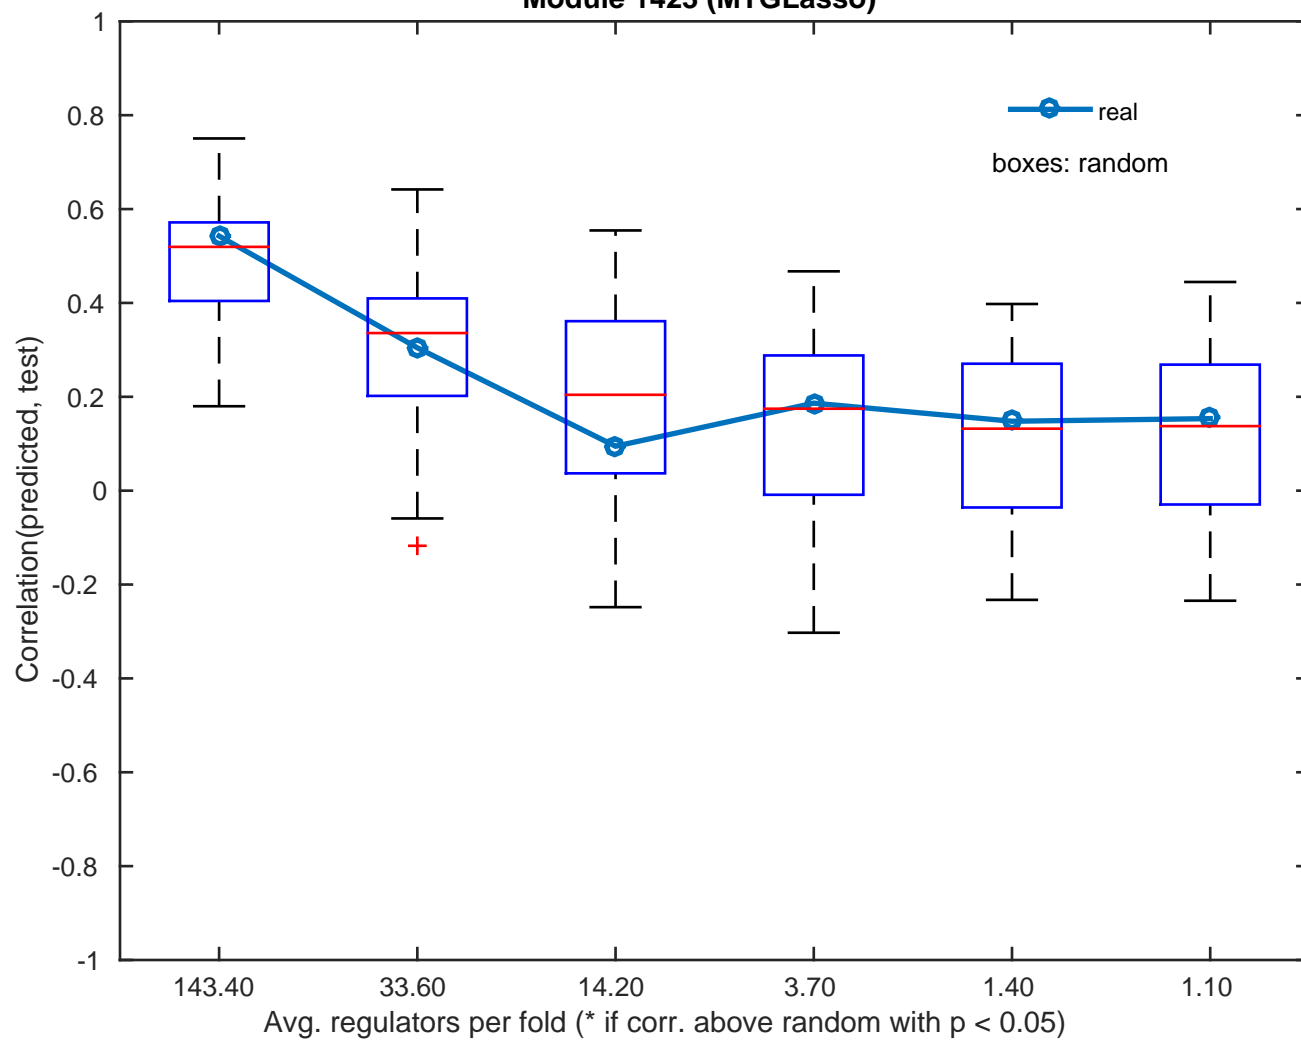

Supplement: S24 (10.1371/journal.pcbi.1005013.s024) [file journal.pcbi.1005013.s024]

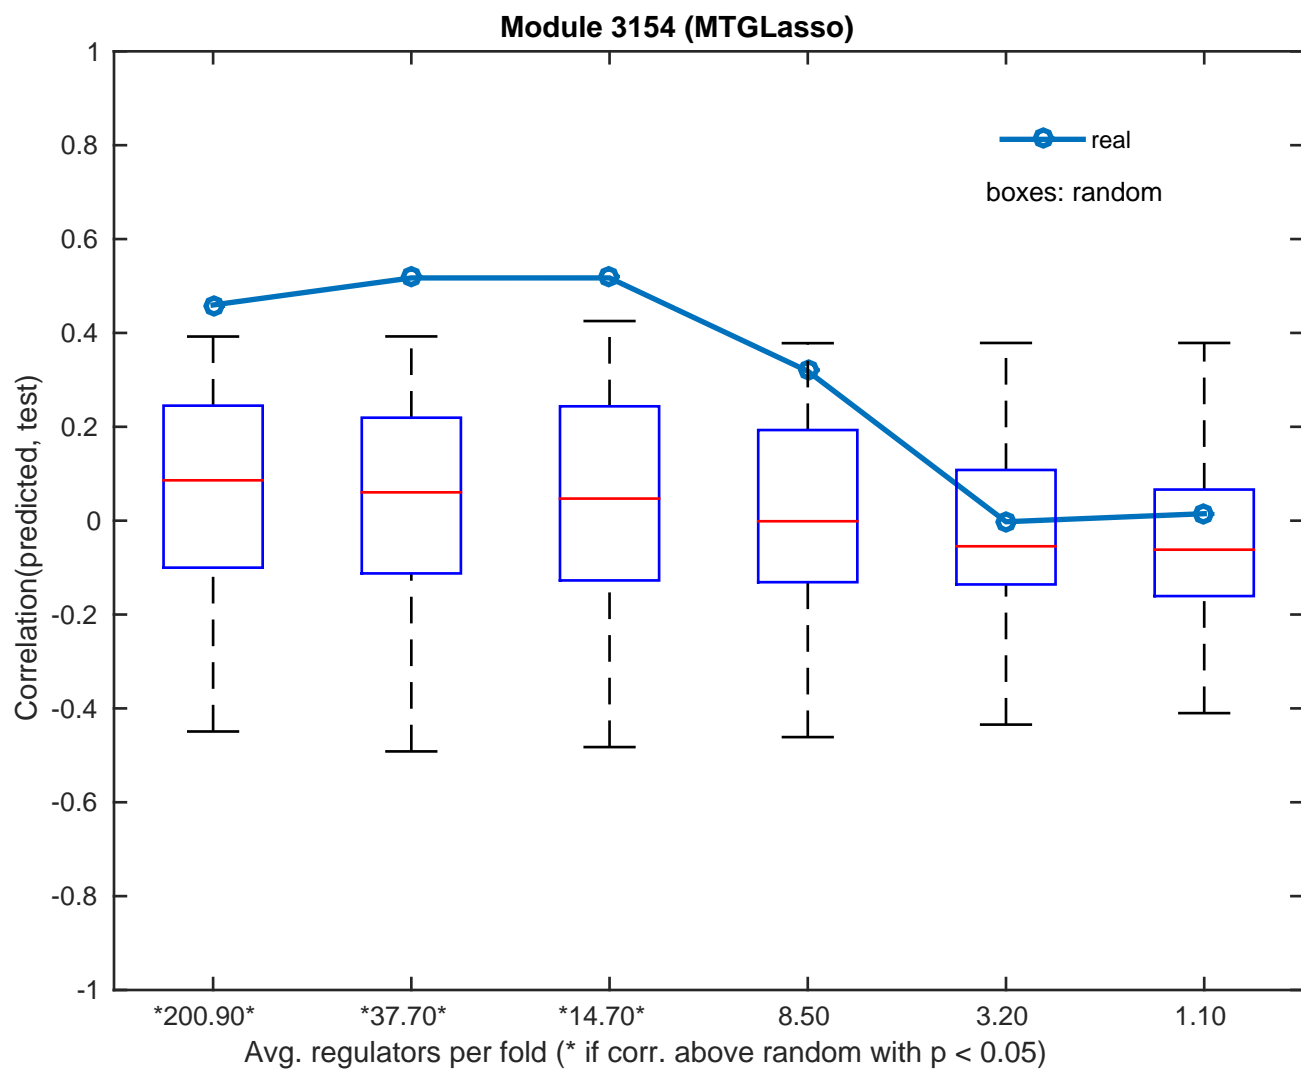

Supplement: S24 (10.1371/journal.pcbi.1005013.s024) [file journal.pcbi.1005013.s024]

Module 1591 (MTGLasso)

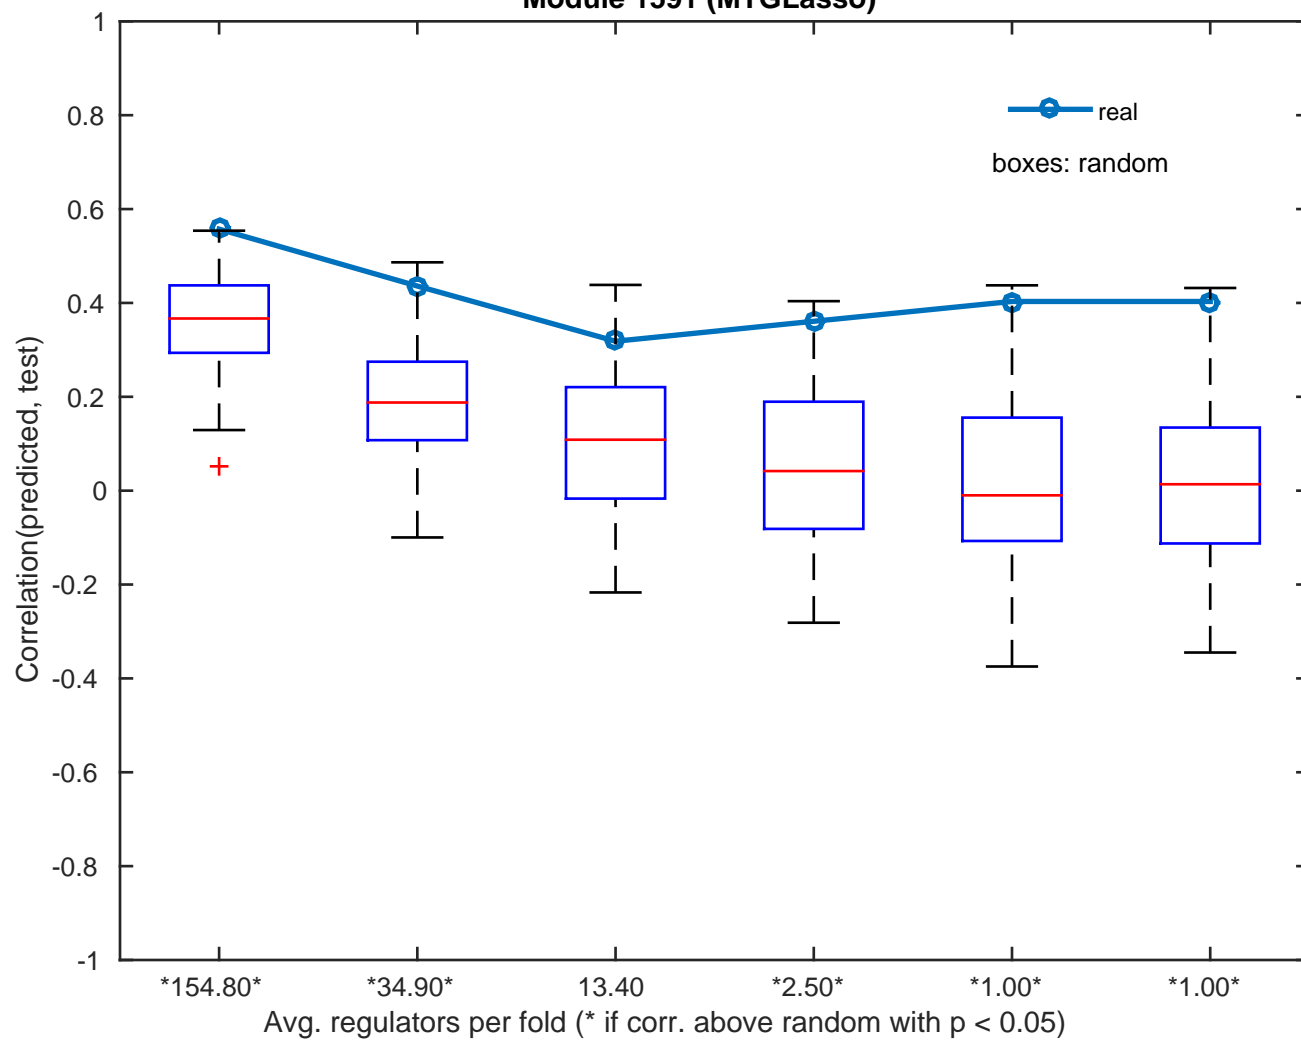

Supplement: S24 (10.1371/journal.pcbi.1005013.s024) [file journal.pcbi.1005013.s024]

Module 1424 (MTGLasso)

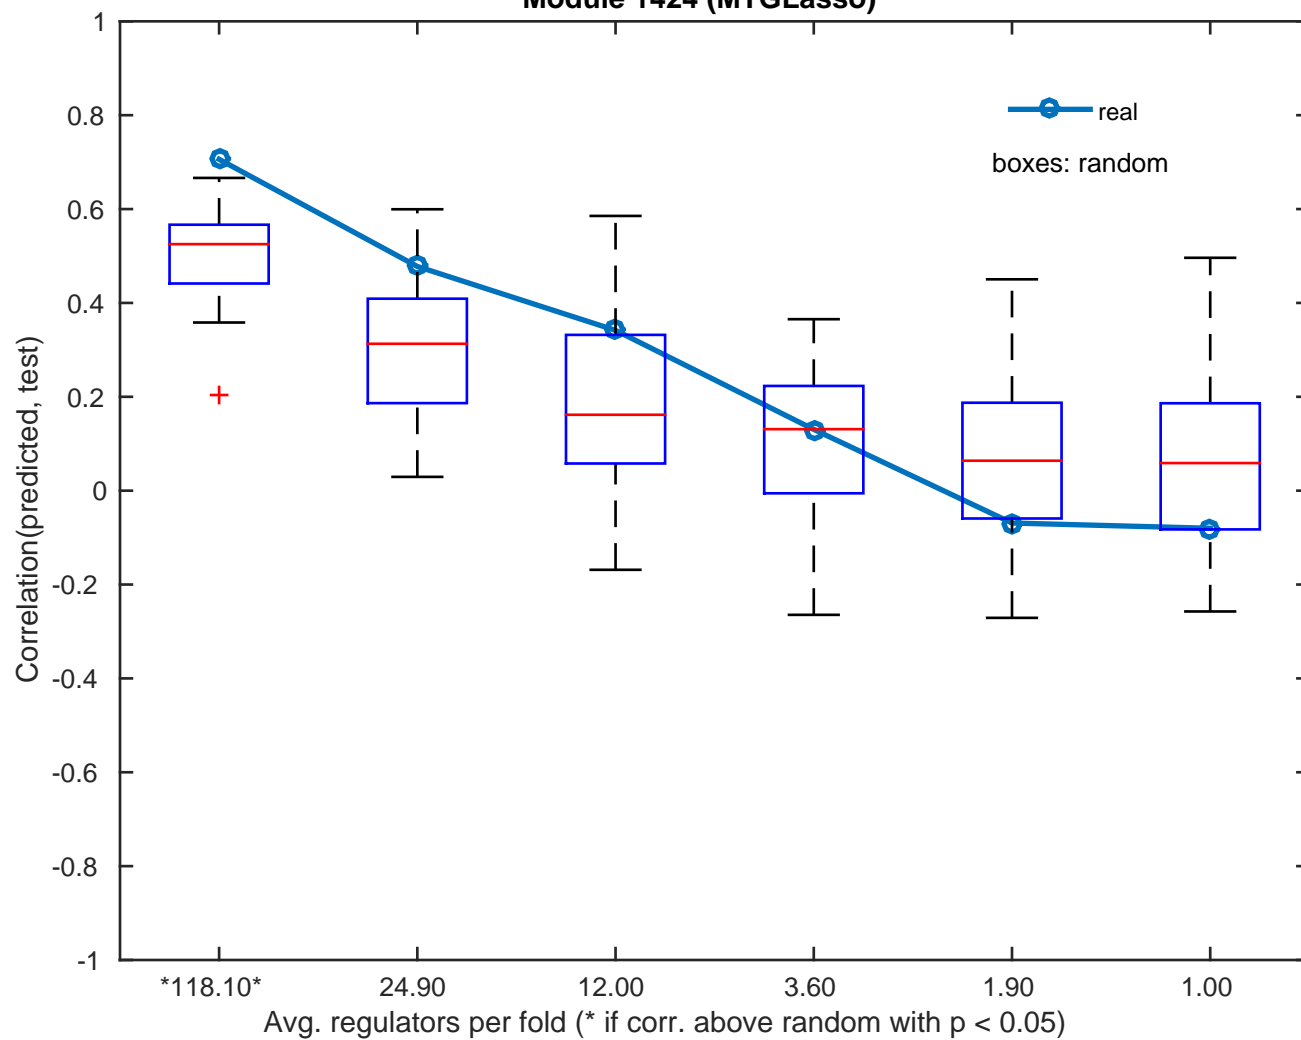

Supplement: S24 (10.1371/journal.pcbi.1005013.s024) [file journal.pcbi.1005013.s024]

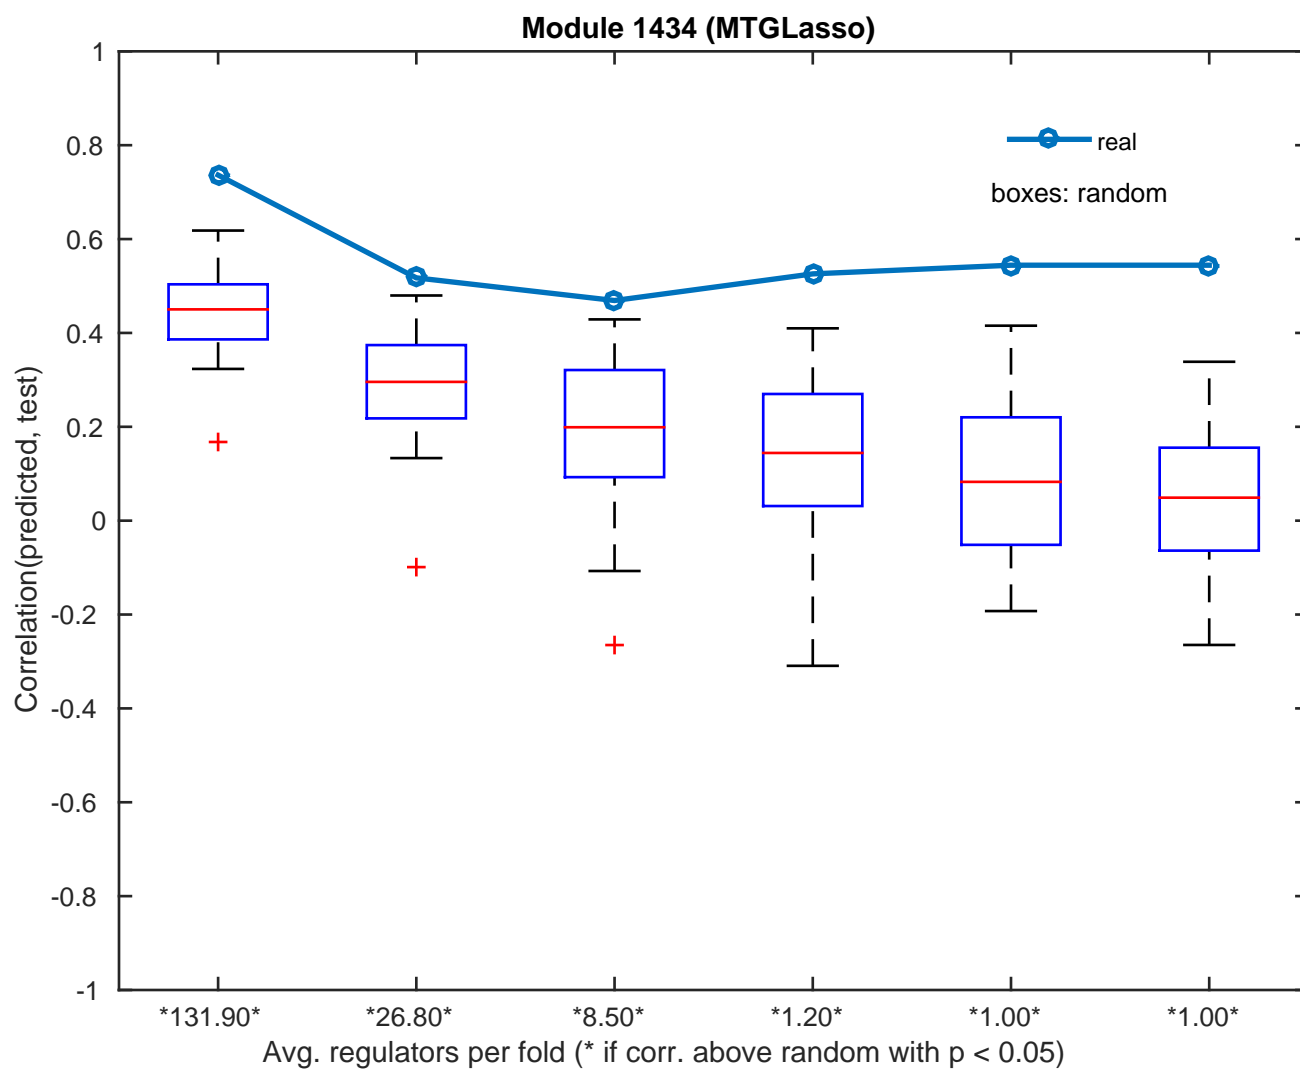

Supplement: S24 (10.1371/journal.pcbi.1005013.s024) [file journal.pcbi.1005013.s024]

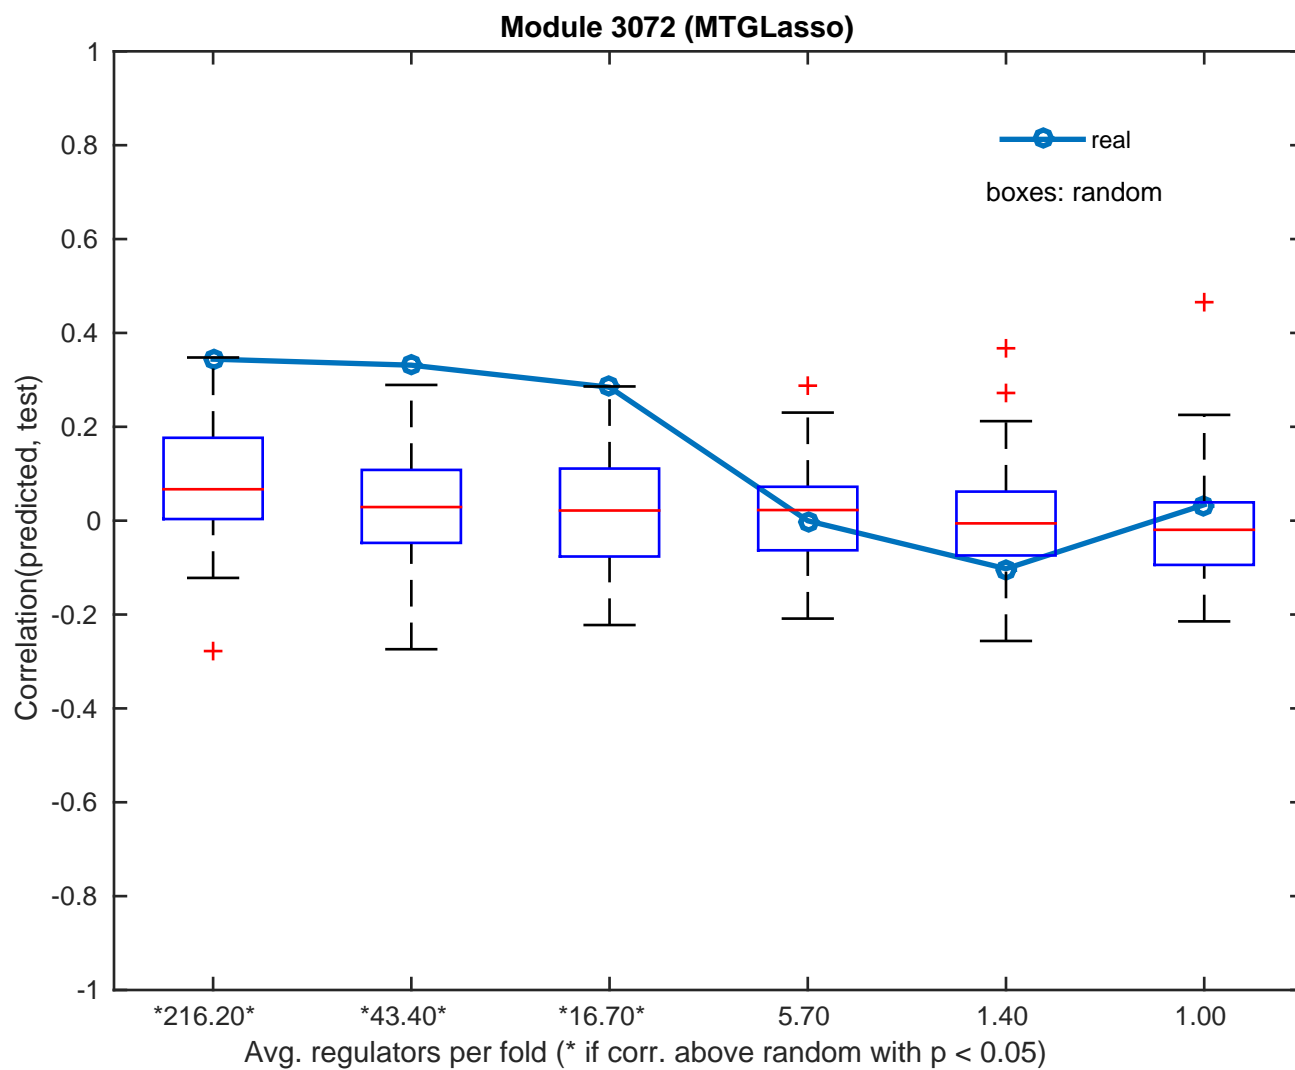

Supplement: S24 (10.1371/journal.pcbi.1005013.s024) [file journal.pcbi.1005013.s024]

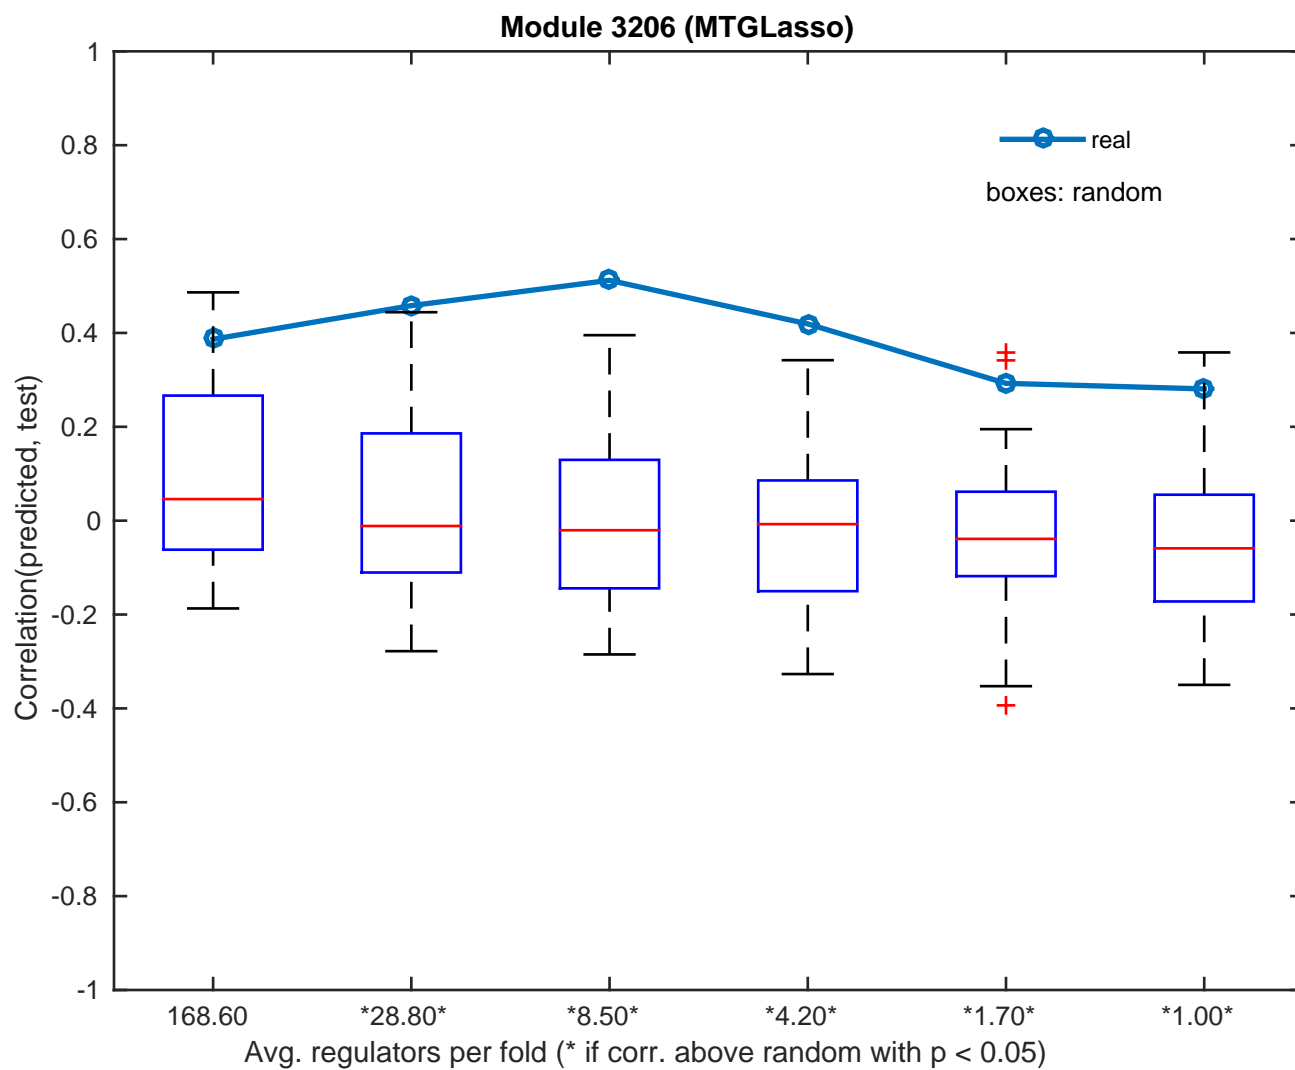

Supplement: S24 (10.1371/journal.pcbi.1005013.s024) [file journal.pcbi.1005013.s024]

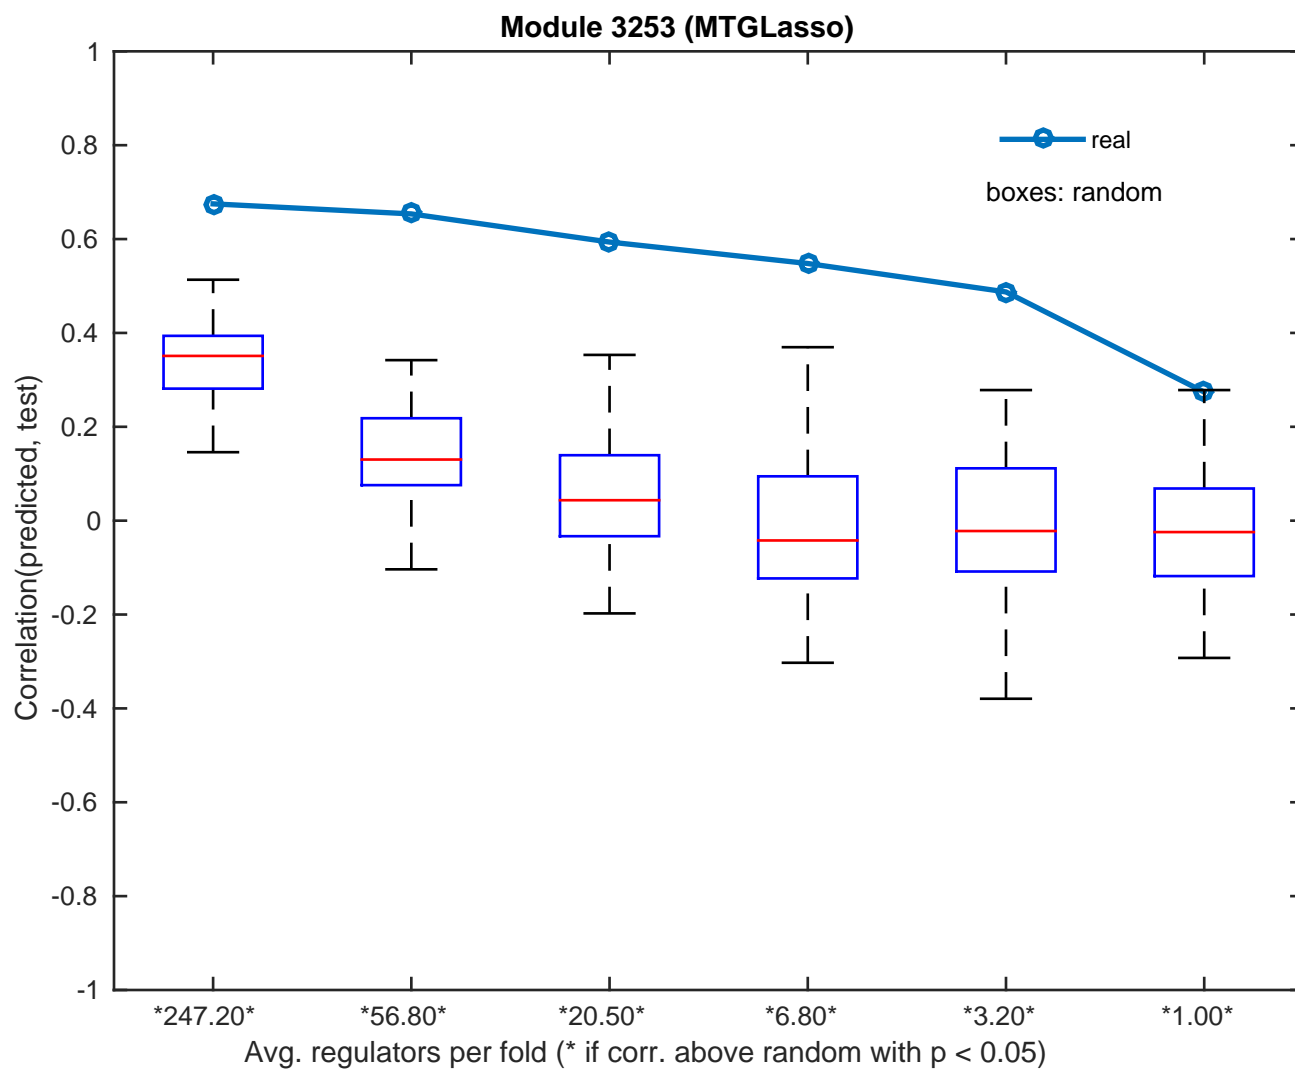

Supplement: S24 (10.1371/journal.pcbi.1005013.s024) [file journal.pcbi.1005013.s024]

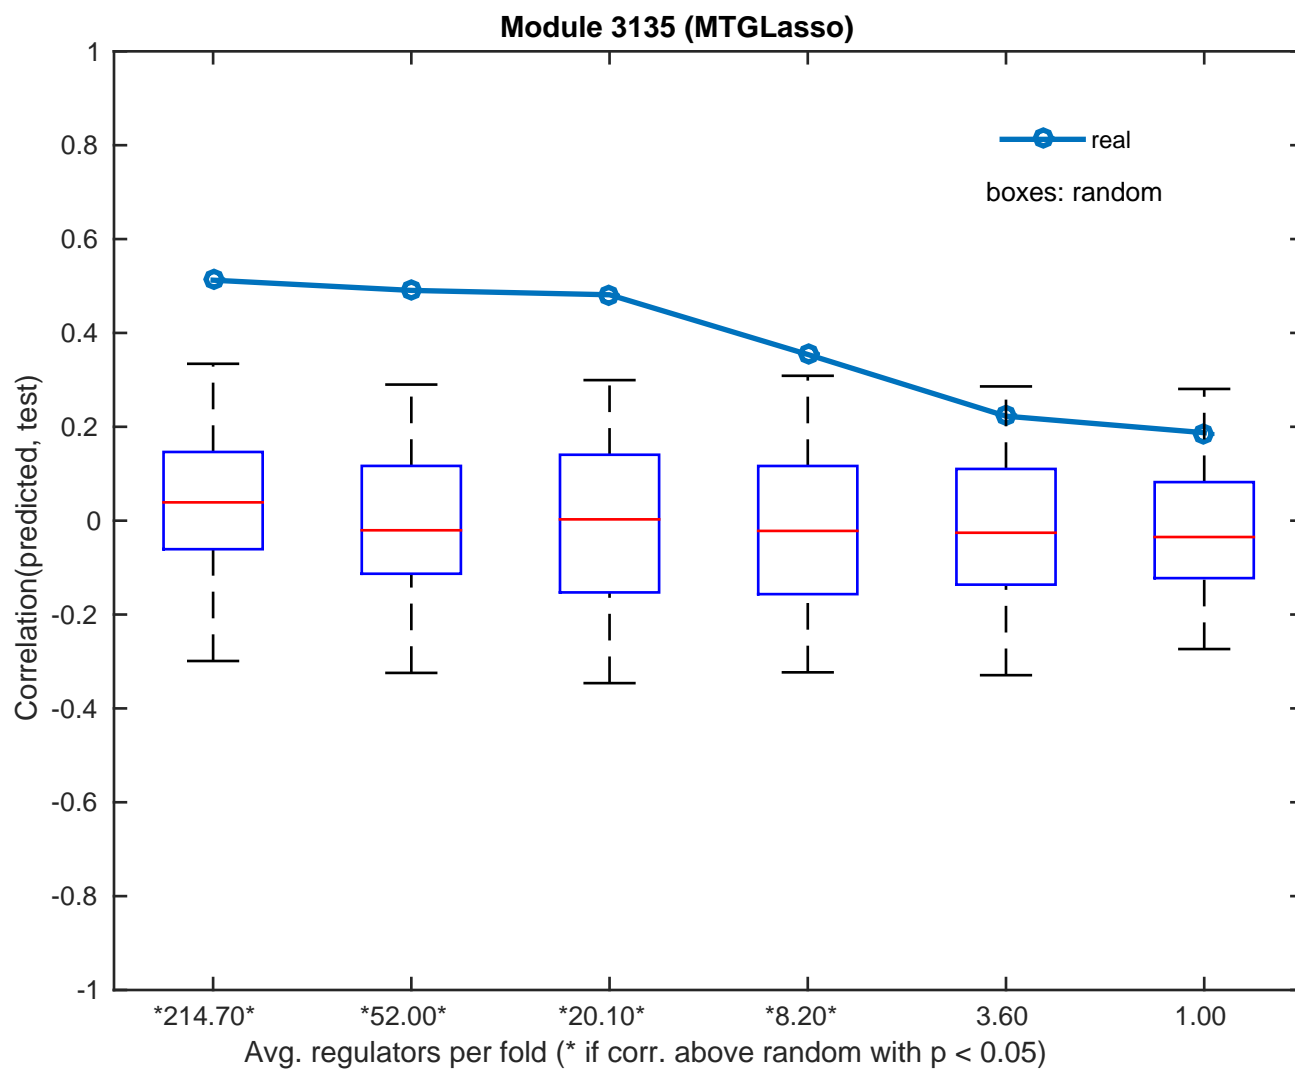

Supplement: S24 (10.1371/journal.pcbi.1005013.s024) [file journal.pcbi.1005013.s024]

Module 1490 (MTGLasso)

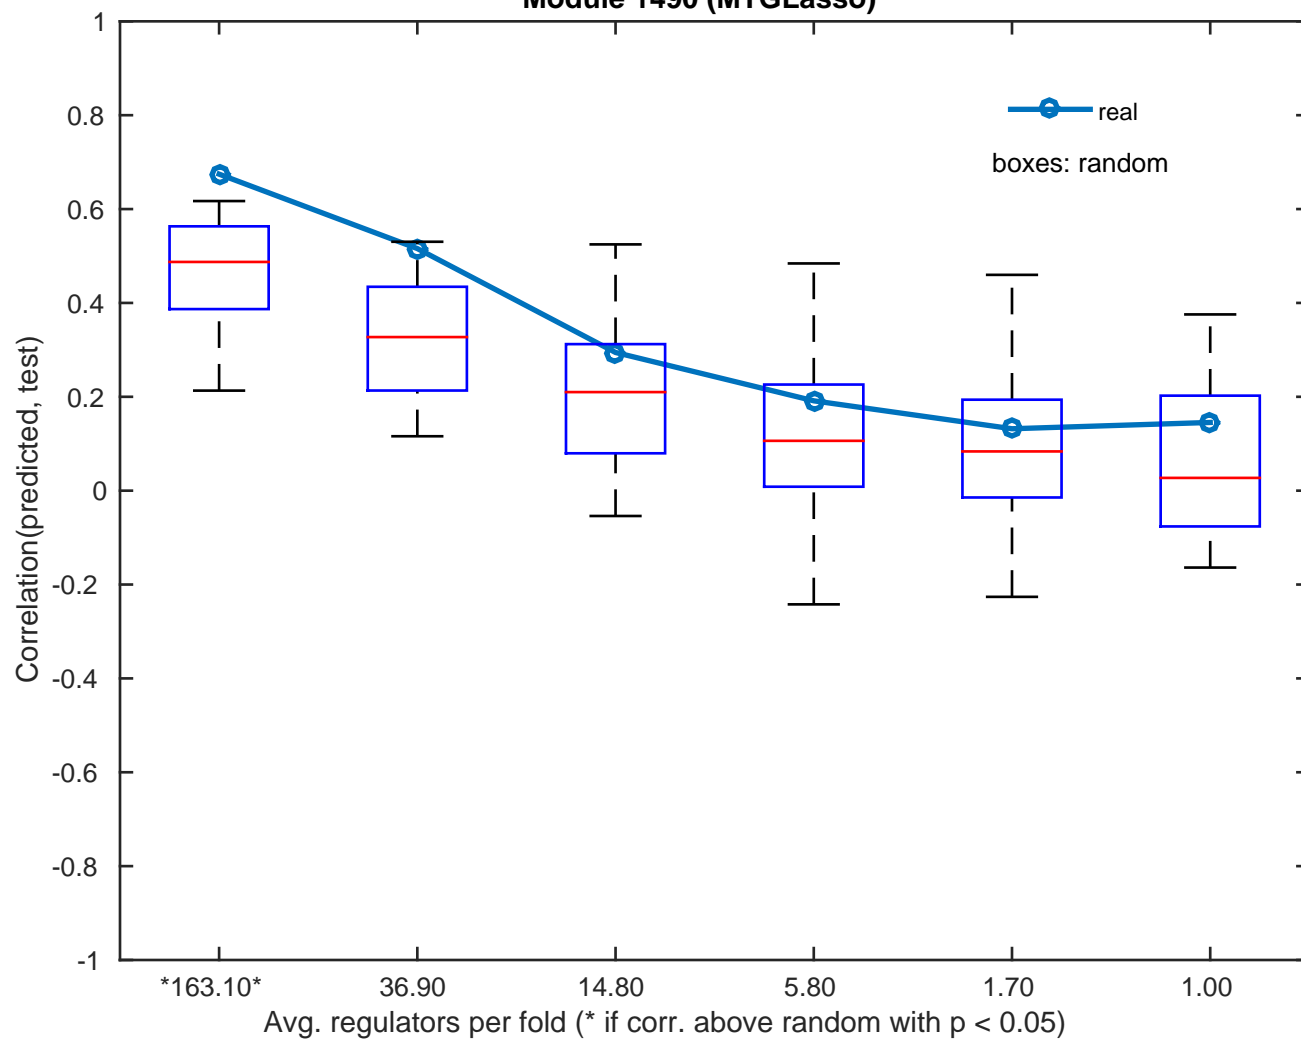

Supplement: S24 (10.1371/journal.pcbi.1005013.s024) [file journal.pcbi.1005013.s024]

Module 3197 (MTGLasso)

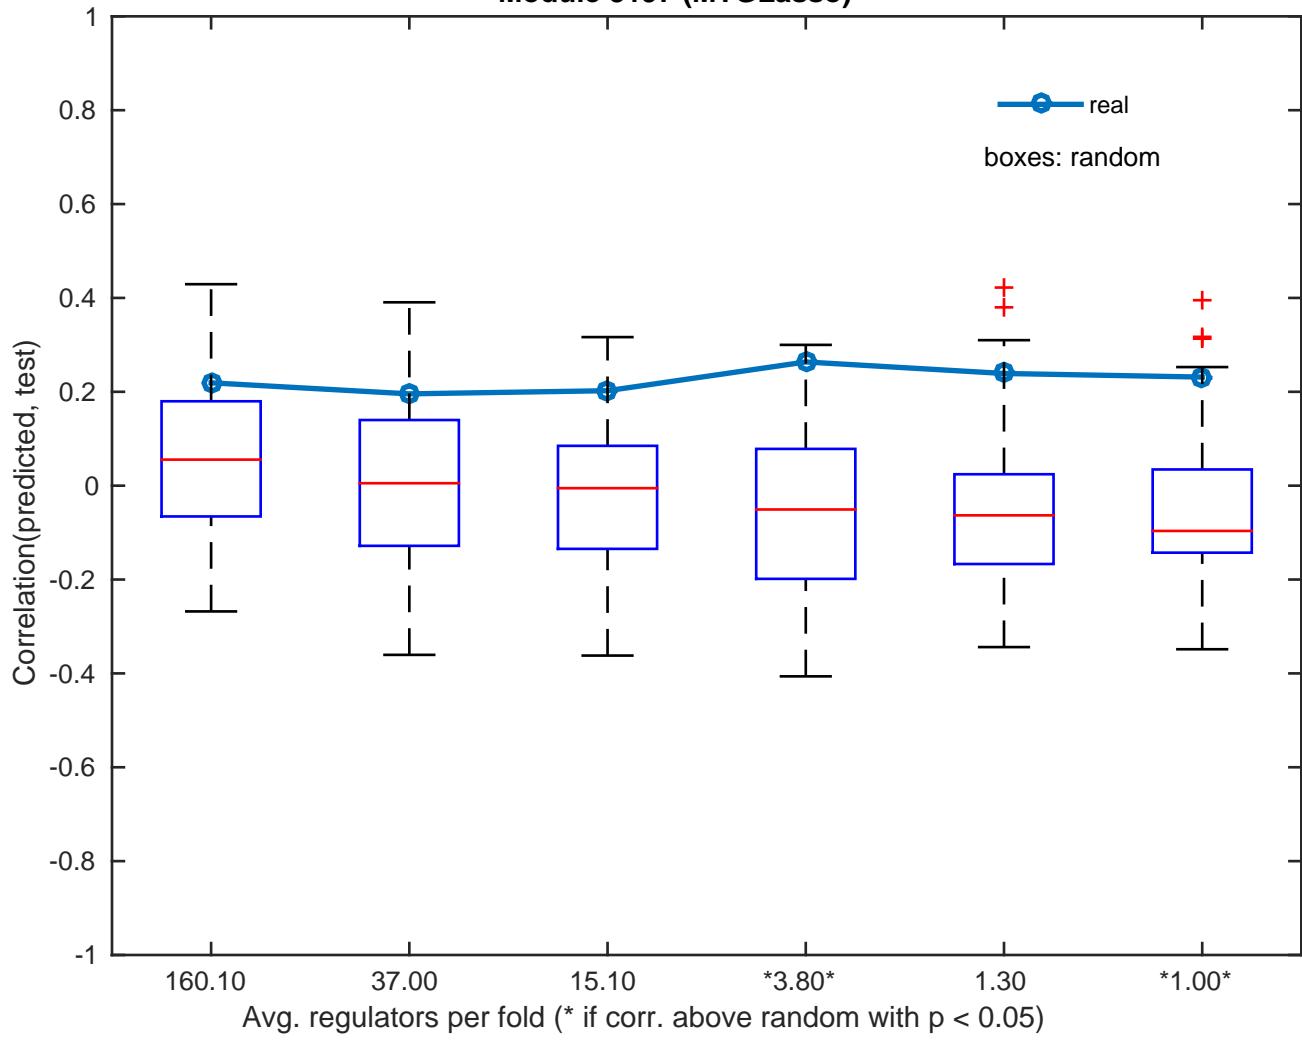

Supplement: S24 (10.1371/journal.pcbi.1005013.s024) [file journal.pcbi.1005013.s024]

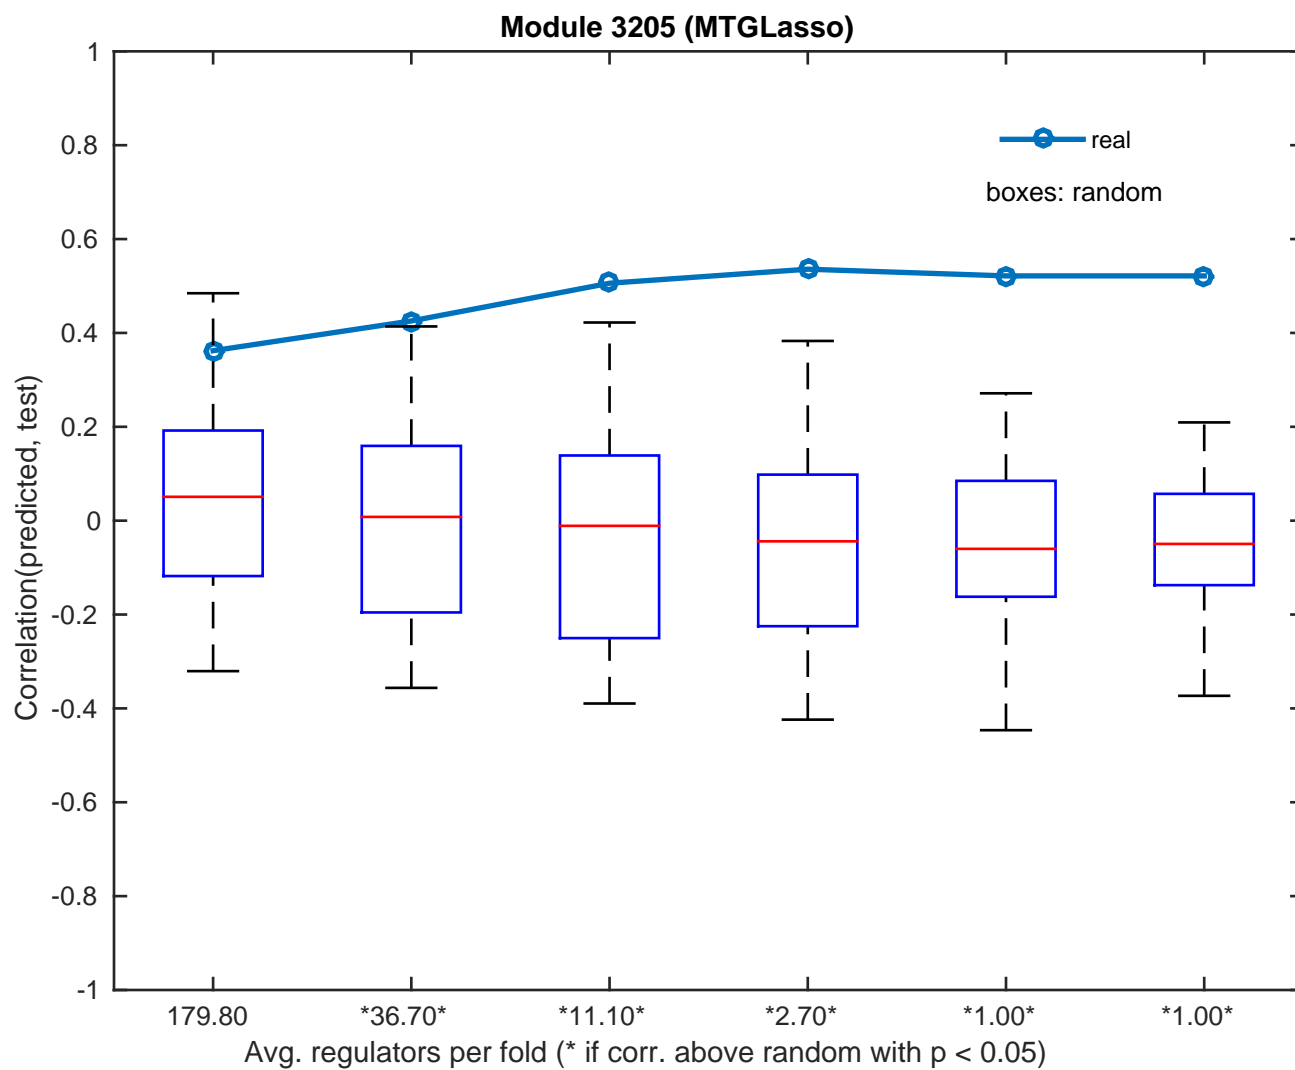

Supplement: S24 (10.1371/journal.pcbi.1005013.s024) [file journal.pcbi.1005013.s024]

Module 2977 (MTGLasso)

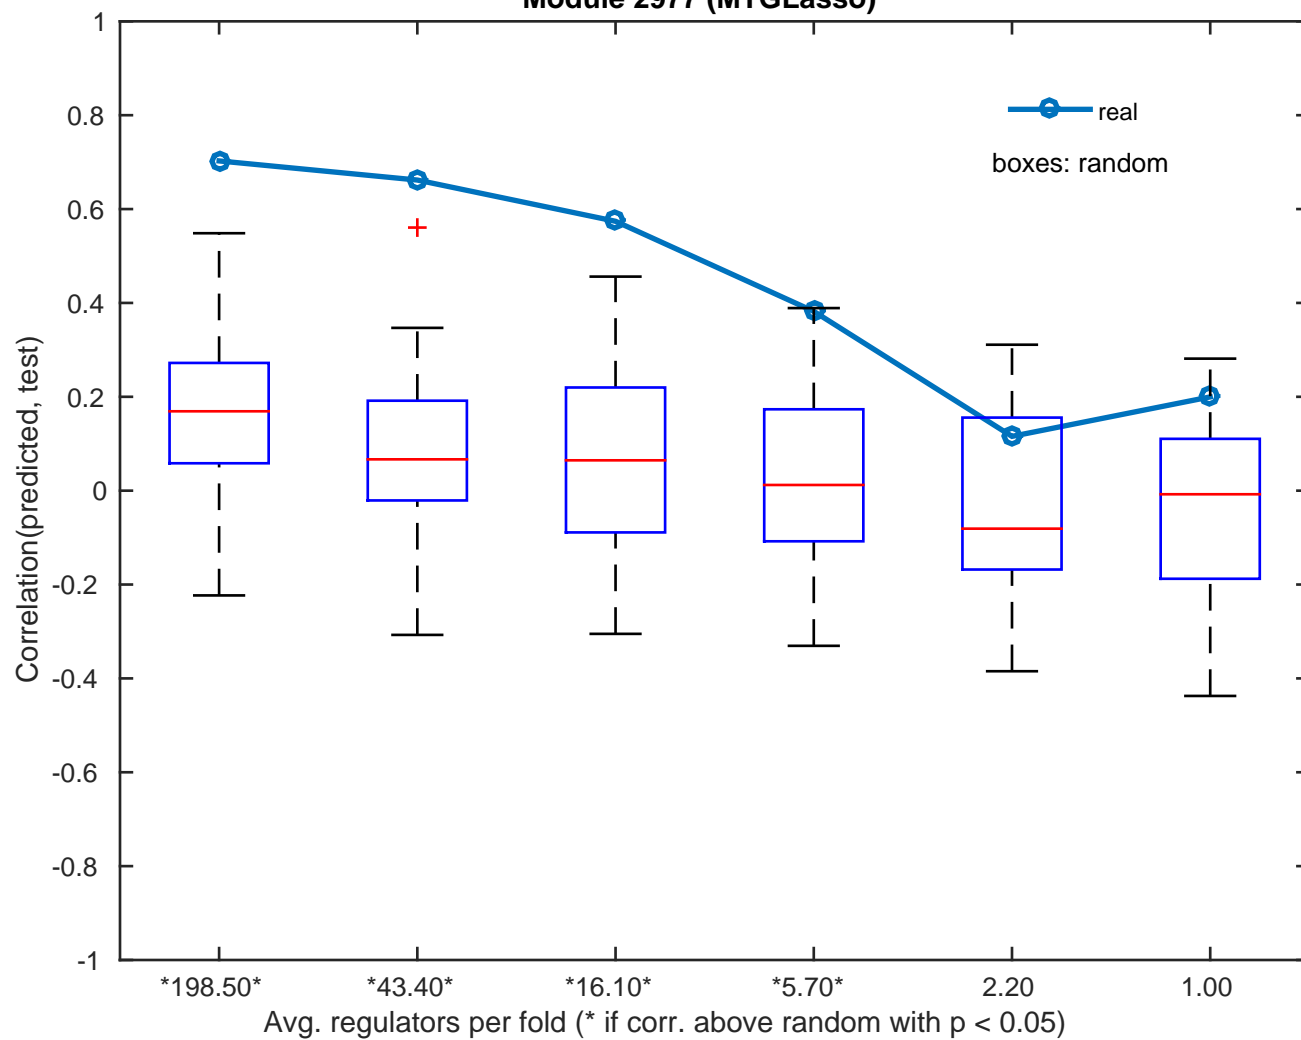

Supplement: S24 (10.1371/journal.pcbi.1005013.s024) [file journal.pcbi.1005013.s024]

Module 1484 (MTGLasso)

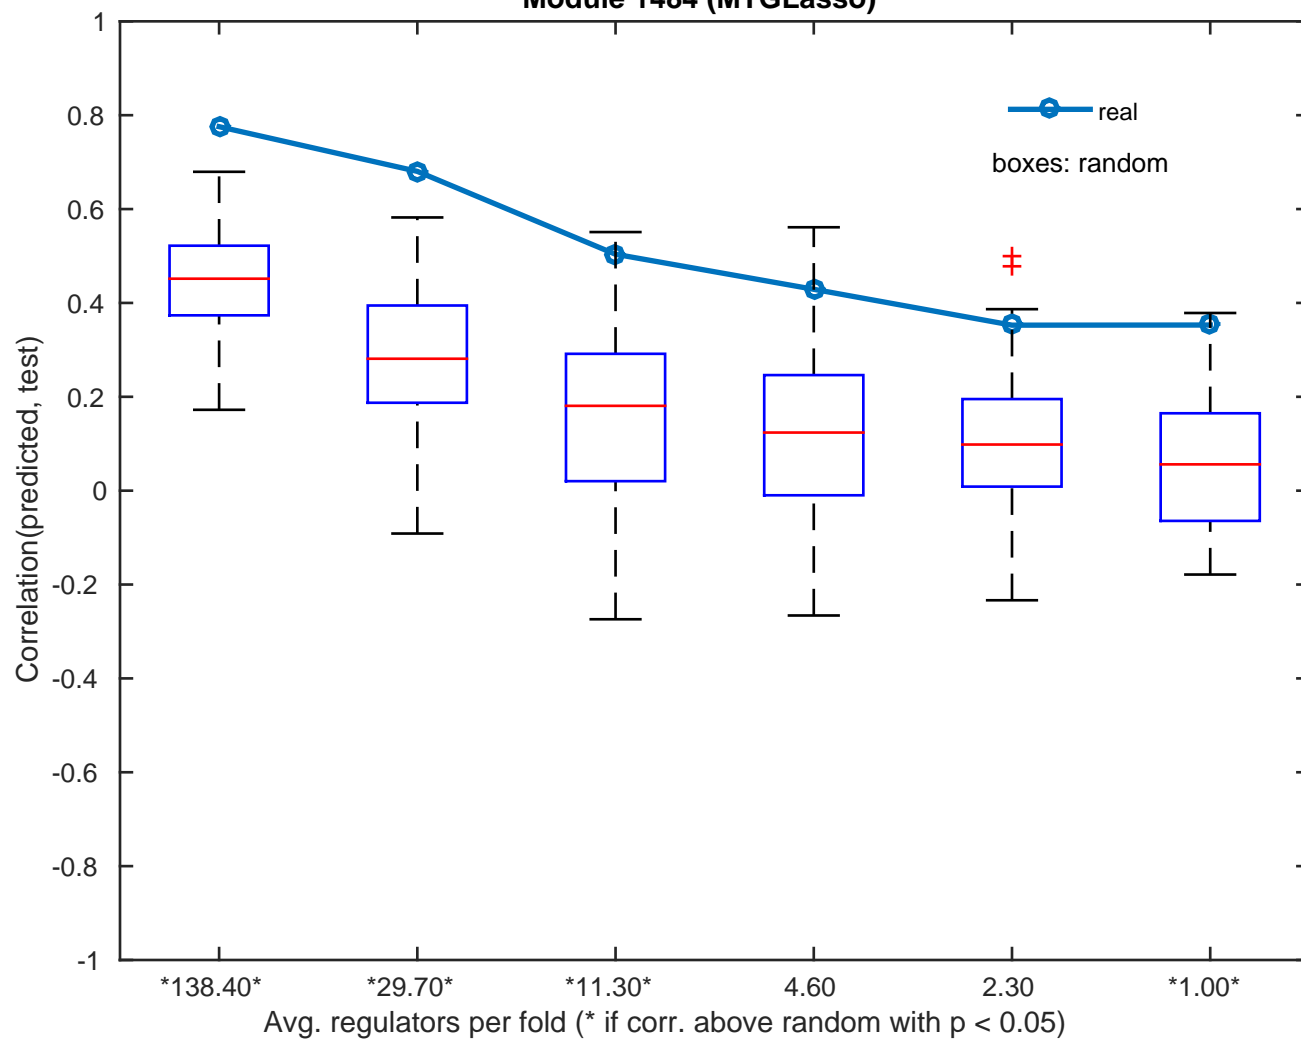

Supplement: S24 (10.1371/journal.pcbi.1005013.s024) [file journal.pcbi.1005013.s024]

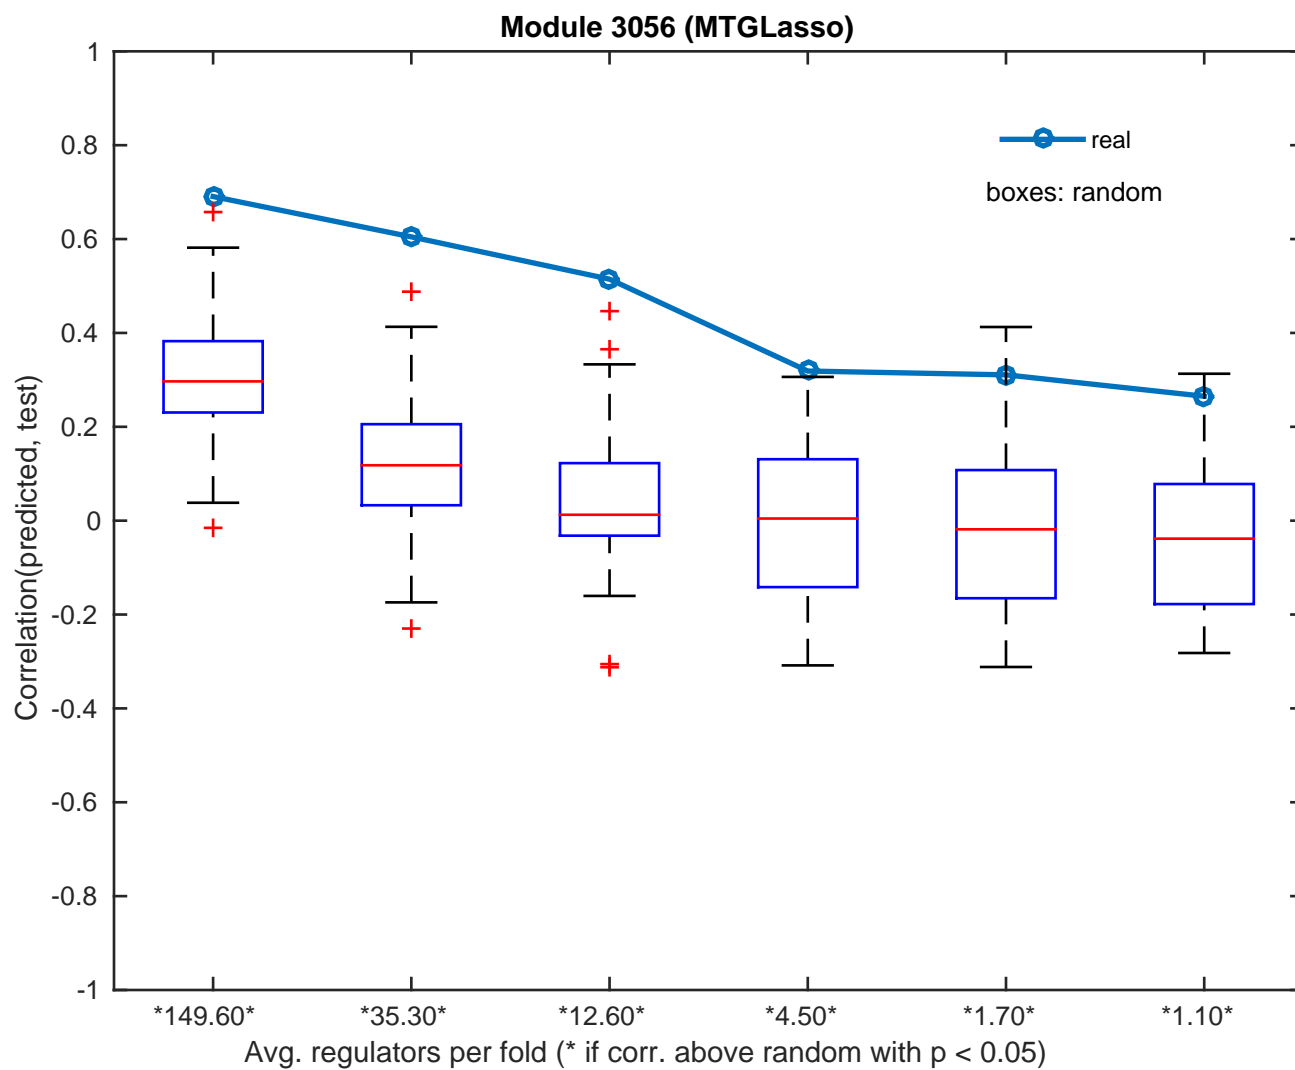

Supplement: S24 (10.1371/journal.pcbi.1005013.s024) [file journal.pcbi.1005013.s024]

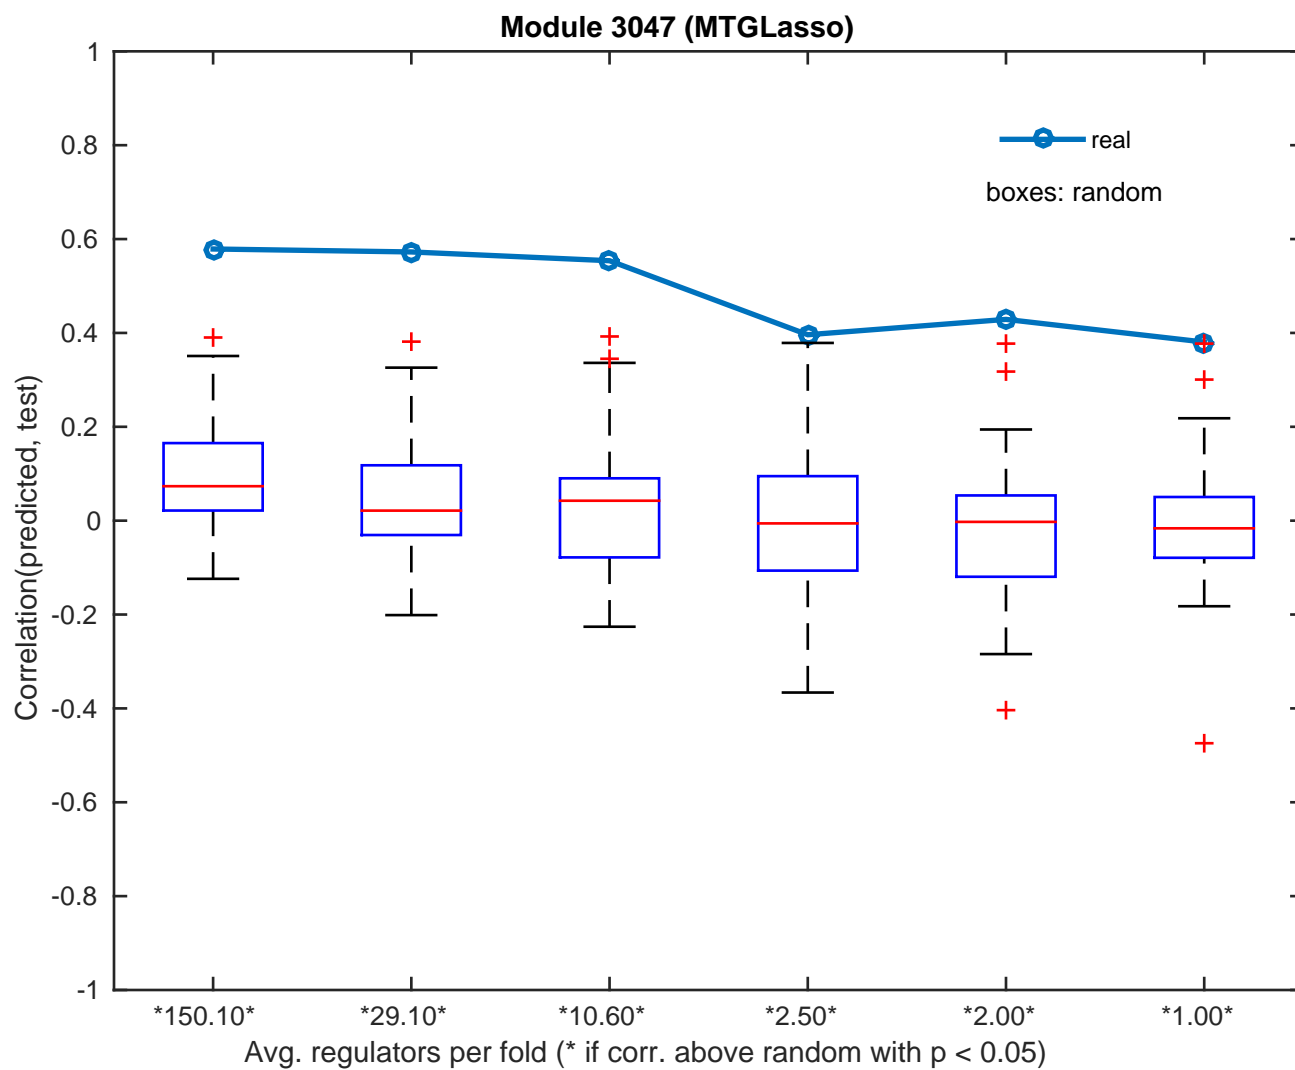

Supplement: S24 (10.1371/journal.pcbi.1005013.s024) [file journal.pcbi.1005013.s024]

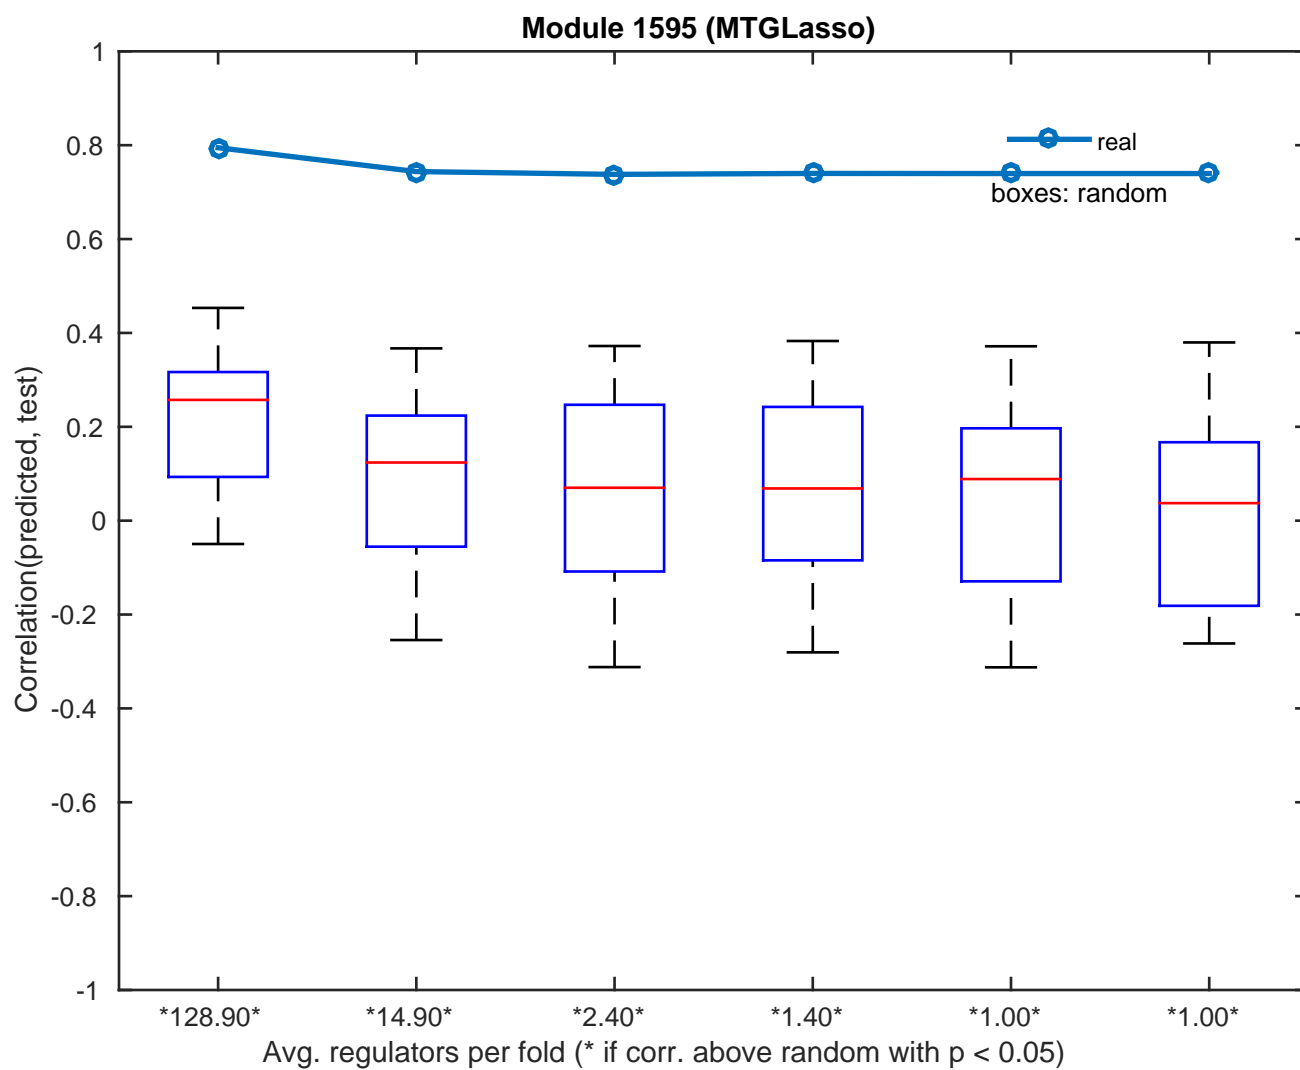

Supplement: S24 (10.1371/journal.pcbi.1005013.s024) [file journal.pcbi.1005013.s024]
